# Supplementary material for: Difluorocarbene as a C–F source for the construction of fluorinated benzothiazoles
Source: Royal Society of Chemistry journal article supplement (doi:10.1039/d3qo01422c), 2023-11-13
Supplement: d3qo01422c1.pdf [file d3qo01422c1.pdf]

## Supporting information

# Difluorocarbene as a C-F source for the Construction of Fluorinated Thiazoles

Wen-Jie Pan,<sup>ab</sup> Jiao Yu,<sup>b</sup> Weiguo Cao,<sup>a\*</sup> Ji-Chang Xiao,<sup>b\*</sup> Jin-Hong Lin<sup>ab\*</sup>

<sup>a</sup>Department of Chemistry, Innovative Drug Research Center, Shanghai University, 200444 Shanghai, China. Email: E-mail: [wgcao@staff.shu.edu.cn](mailto:wgcao@staff.shu.edu.cn) (W. Cao); [jlin@sioc.ac.cn](mailto:jlin@sioc.ac.cn), [jlin@shu.edu.cn](mailto:jlin@shu.edu.cn) (J.-H. Lin)

<sup>b</sup>Key Laboratory of Organofluorine Chemistry, Shanghai Institute of Organic Chemistry, University of Chinese Academy of Sciences, Chinese Academy of Sciences, 345 Lingling Road, 200032 Shanghai, China. [jchxiao@sioc.ac.cn](mailto:jchxiao@sioc.ac.cn) (J.-C. Xiao)

### Table of Contents

|                                                                                                        |            |
|--------------------------------------------------------------------------------------------------------|------------|
| <b>1. General Information.....</b>                                                                     | <b>S2</b>  |
| <b>2. General procedure for the synthesis of the substrates.....</b>                                   | <b>S2</b>  |
| <b>3. Screening reaction conditions by using BrCF<sub>2</sub>CO<sub>2</sub>K instead of PDFFA.....</b> | <b>S7</b>  |
| <b>4. General procedure for the synthesis of Fluorinated Thiazoles.....</b>                            | <b>S8</b>  |
| <b>5. Mechanistic Investigations.....</b>                                                              | <b>S14</b> |
| <b>6. References.....</b>                                                                              | <b>S15</b> |
| <b>7. Copies of NMR Spectra.....</b>                                                                   | <b>S16</b> |

## 1. General Information

All reagents were commercially available and used without further purification unless indicated otherwise.  $^1\text{H}$ ,  $^{13}\text{C}$  and  $^{19}\text{F}$  NMR spectra were recorded on a Bruker 500 MHz spectrometer. NMR spectra were recorded on a Bruker Advance 600 ( $^1\text{H}$ : 600 MHz,  $^{19}\text{F}$  NMR: 565 MHz,  $^{13}\text{C}$ : 150 MHz), Bruker Advance 500 ( $^1\text{H}$ : 500 MHz,  $^{13}\text{C}$ : 125 MHz,  $^{19}\text{F}$ : 470 MHz) and JEOL ECZ 400MHz at ambient temperature.  $\text{CDCl}_3$  was used as the NMR solvent. The chemical shifts for  $^1\text{H}$  are given in ppm relative to tetramethylsilane (0.00) as a standard. The chemical shifts for  $^{13}\text{C}$  are given in ppm relative to  $\text{CDCl}_3$  (77.0 ppm) as a standard. The chemical shifts for  $^{19}\text{F}$  NMR are given in ppm relative to trichlorofluoromethane (0.00) as a standard.  $^1\text{H}$ ,  $^{13}\text{C}$  and  $^{19}\text{F}$  multiplicities are reported as follows: singlet (s), doublet (d), triplet (t), quartet (q), doublet of doublets (dd), triplet of doublets (td), triplet of triplet (tt), multiplet (m), quint (quintet), septet (sept), sextet (sext) and broad resonance (br). High resolution mass spectrometry (HRMS) was performed on a Waters Premier GC-TOF MS instrument with electron impact ionization mode (EI), time-of-flight mass spectrometer field ionization mode (FI), or on a Thermo Scientific Q Exactive HF Orbitrap-FTMS instrument with electrospray ionization mode (ESI). Unless noted, all reagents were bought from commercial suppliers and used without further purification. Compounds **4** for the synthesis of substrate **1** were bought from commercial suppliers or synthesized according to reported literature.<sup>1</sup>

## 2. General procedure for the synthesis of the substrates<sup>2</sup>

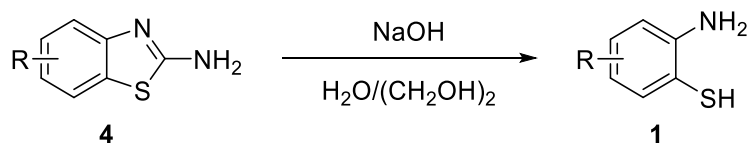

A solution of compound **4** (10 mmol) in a mixture of aqueous 50% NaOH and ethylene glycol (v/v = 1/1, 20 mL) was refluxed under a  $\text{N}_2$  atmosphere until the starting material disappeared, as monitored by TLC (about 15 h). The mixture was then poured into ice water, acidified to pH = 3 with 3 M aqueous HCl, and extracted with  $\text{CH}_2\text{Cl}_2$ . The combined organic layers were washed with brine, dried over  $\text{Na}_2\text{SO}_4$ , and concentrated to remove the solvent. The residue was subjected to flash chromatography on silica using hexane/EtOAc (v/v = 2/1 to 1/1) as an eluent to give substrate **1**.

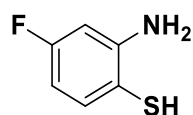

**2-amino-4-fluorobenzenethiol (1b)**<sup>2</sup>: yellow solid; 325.6 mg, 44% yield (5 mmol of **4b** was used).

$^1\text{H}$  NMR (500 MHz, Chloroform-*d*)  $\delta$  7.04 (dd,  $J$  = 8.6, 6.5 Hz, 1H), 6.41 (dd,  $J$  = 10.6, 2.6 Hz, 1H), 6.29 (td,  $J$  = 8.5, 2.7 Hz, 1H), 4.49 (br, 2H).  $^{19}\text{F}$  NMR (470 MHz, Chloroform-*d*)  $\delta$  -108.42 – -108.50 (m, 1F).  $^{13}\text{C}$  NMR (125 MHz, Chloroform-*d*)  $\delta$  165.39 (d,  $J$  = 248.4 Hz), 150.41 (d,  $J$  = 12.2 Hz), 138.86 (d,  $J$  = 10.6 Hz), 113.72 (d,  $J$  = 2.6 Hz), 105.45 (d,  $J$  = 22.2 Hz), 101.64 (d,  $J$  = 25.3 Hz). GC-MS (EI)  $m/z$ :  $[\text{M}]^+$  Calcd for  $\text{C}_6\text{H}_6\text{FNS}$  143.0; Found 143.0.

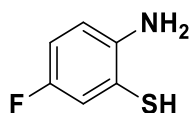

**2-amino-5-fluorobenzenethiol (1c)**<sup>3</sup>: yellow solid; yield: 515 mg (36%).

<sup>1</sup>H NMR (500 MHz, Chloroform-*d*) δ 6.95 – 6.88 (m, 2H), 6.66 (dd, *J* = 8.6, 4.8 Hz, 1H), 4.18 (br, 2H). <sup>19</sup>F NMR (470 MHz, Chloroform-*d*) δ -126.26 (td, *J* = 8.3, 4.7 Hz, 1F). <sup>13</sup>C NMR (125 MHz, Chloroform-*d*) δ 154.93 (d, *J* = 239.2 Hz), 144.92 (d, *J* = 2.0 Hz), 121.78 (d, *J* = 22.3 Hz), 118.96 (d, *J* = 7.3 Hz), 118.81 (d, *J* = 22.5 Hz), 116.08 (d, *J* = 7.4 Hz). GC-MS (EI) *m/z*: [M]<sup>+</sup> Calcd for C<sub>6</sub>H<sub>6</sub>FNS 143.0; Found 143.0.

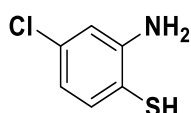

**2-amino-4-chlorobenzenethiol (1d)**<sup>2</sup>: yellow solid; yield: 206.7 mg (13%).

<sup>1</sup>H NMR (500 MHz, Chloroform-*d*) δ 7.02 (d, *J* = 8.3 Hz, 1H), 6.71 (d, *J* = 2.2 Hz, 1H), 6.56 (dd, *J* = 8.2, 2.2 Hz, 1H), 4.42 (br, 2H). <sup>13</sup>C NMR (125 MHz, Chloroform-*d*) δ 149.47, 137.88, 137.66, 118.35, 116.64, 114.78. GC-MS (EI) *m/z*: [M]<sup>+</sup> Calcd for C<sub>6</sub>H<sub>6</sub>ClNS 159.0; Found 159.0.

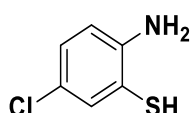

**2-amino-5-chlorobenzenethiol (1e)**<sup>4</sup>: yellow solid; yield: 397.5 mg (25%)

<sup>1</sup>H NMR (500 MHz, Chloroform-*d*) δ 7.14 – 7.11 (m, 2H), 6.64 (dd, *J* = 8.1, 0.8 Hz, 1H), 4.31 (br, 2H). <sup>13</sup>C NMR (125 MHz, Chloroform-*d*) δ 147.19, 135.66, 131.71, 122.21, 119.39, 116.25. GC-MS (EI) *m/z*: [M]<sup>+</sup> Calcd for C<sub>6</sub>H<sub>6</sub>ClNS 159.0; Found 159.0.

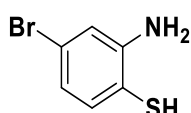

**2-amino-4-bromobenzenethiol (1h)**<sup>3</sup>: yellow solid; yield: 615.1 mg (30%)

<sup>1</sup>H NMR (500 MHz, Chloroform-*d*) δ 6.96 (d, *J* = 8.2 Hz, 1H), 6.88 (d, *J* = 2.0 Hz, 1H), 6.71 (dd, *J* = 8.2, 2.1 Hz, 1H), 4.41 (br, 2H). <sup>13</sup>C NMR (125 MHz, Chloroform-*d*) δ 149.59, 137.96, 126.01, 121.25, 117.72, 117.21. GC-MS (EI) *m/z*: [M]<sup>+</sup> Calcd for C<sub>6</sub>H<sub>6</sub>BrNS 204.9; Found 204.9.

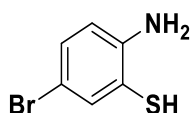

**2-amino-5-bromobenzenethiol (1i)**<sup>4</sup>: yellow solid; yield: 491.7 mg (24%).

<sup>1</sup>H NMR (500 MHz, Chloroform-*d*) δ 7.28-7.25 (m, 2H), 6.62 (d, *J* = 9.1 Hz, 1H), 4.35 (br, 2H). <sup>13</sup>C NMR (125 MHz, Chloroform-*d*) δ 147.61, 138.57, 134.52, 119.88, 116.65, 108.95. GC-MS (EI) *m/z*: [M]<sup>+</sup> Calcd for C<sub>6</sub>H<sub>6</sub>BrNS 204.9; Found 204.9.

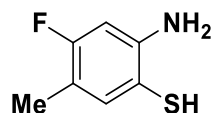

**2-amino-4-fluoro-5-methylbenzenethiol (1j)**: yellow solid (m.p. 110-111 °C); yield: 596.6 mg (38%)

$^1\text{H NMR}$  (500 MHz, Chloroform-*d*)  $\delta$  6.88 (d,  $J = 8.5$  Hz, 1H), 6.40 (d,  $J = 11.2$  Hz, 1H), 4.31 (br, 2H), 2.04 (d,  $J = 1.8$  Hz, 3H).  $^{19}\text{F NMR}$  (470 MHz, Chloroform-*d*)  $\delta$  -112.25 – -112.38 (m).  $^{13}\text{C NMR}$  (125 MHz, Chloroform-*d*)  $\delta$  163.60 (d,  $J = 247.9$  Hz), 148.28 (d,  $J = 11.8$  Hz), 139.79 (d,  $J = 7.7$  Hz), 114.50 (d,  $J = 18.6$  Hz), 113.77 (d,  $J = 2.8$  Hz), 101.74 (d,  $J = 26.2$  Hz), 13.35 (d,  $J = 3.1$  Hz). **HRMS** (FI) calcd. for  $\text{C}_7\text{H}_8\text{FNS}^+$   $[\text{M}]^+$ : 157.0361, found: 157.0356.

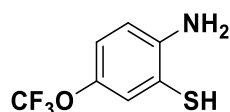

**2-amino-5-(trifluoromethoxy)benzenethiol (1k)**<sup>5</sup>: yellow solid; yield: 480.7 mg (23%)

$^1\text{H NMR}$  (600 MHz, Chloroform-*d*)  $\delta$  7.51 (d,  $J = 8.7$  Hz, 1H), 7.47 (s, 1H), 7.18 (d,  $J = 8.5$  Hz, 1H), 5.42 (br, 2H), 1.78 (br, 1H).  $^{19}\text{F NMR}$  (565 MHz, Chloroform-*d*)  $\delta$  -58.20 (s, 3F).  $^{13}\text{C NMR}$  (125 MHz, Chloroform-*d*)  $\delta$  147.44, 140.06 (q,  $J = 2.1$  Hz), 128.97, 125.26, 120.97 (q,  $J = 255.9$  Hz), 118.18, 115.57. **GC-MS** (EI)  $m/z$ :  $[\text{M}]^+$  Calcd for  $\text{C}_7\text{H}_6\text{F}_3\text{NOS}$  209.0; Found 209.0.

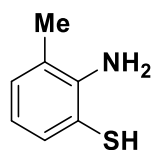

**2-amino-3-methylbenzenethiol (1l)**<sup>2</sup>: yellow solid; yield: 861.8 mg (62%)

$^1\text{H NMR}$  (500 MHz, Chloroform-*d*)  $\delta$  7.45 – 7.42 (m, 1H), 7.14 – 7.12 (m, 1H), 7.04 (t,  $J = 7.6$  Hz, 1H), 5.31 (br, 2H), 2.56 (s, 3H).  $^{13}\text{C NMR}$  (125 MHz, Chloroform-*d*)  $\delta$  146.98, 134.67, 132.61, 122.49, 118.52, 117.58, 18.08. **GC-MS** (EI)  $m/z$ :  $[\text{M}]^+$  Calcd for  $\text{C}_7\text{H}_9\text{NS}$  139.0; Found 139.0.

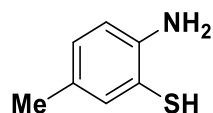

**2-amino-5-methylbenzenethiol (1m)**<sup>6</sup>: yellow solid; yield: 834 mg, 40% yield (15 mmol of **4m** was used)

$^1\text{H NMR}$  (500 MHz, Chloroform-*d*)  $\delta$  6.99-6.94 (m, 2H), 6.64 (d,  $J = 8.0$  Hz, 1H), 4.18 (br, 2H), 2.13 (s, 3H), 1.56 (br, 1H).  $^{13}\text{C NMR}$  (125 MHz, Chloroform-*d*)  $\delta$  146.23, 137.06, 132.34, 127.51, 118.94, 115.35, 20.08. **GC-MS** (EI)  $m/z$ :  $[\text{M}]^+$  Calcd for  $\text{C}_7\text{H}_9\text{NS}$  139.0; Found 139.0.

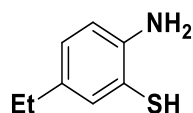

**2-amino-5-ethylbenzenethiol (1n)**<sup>7</sup>: yellow solid; yield: 627.3 mg (41%)

<sup>1</sup>H NMR (500 MHz, Chloroform-*d*) δ 7.00 (dd, *J* = 8.1, 2.2 Hz, 1H), 6.94 (d, *J* = 2.1 Hz, 1H), 6.66 (d, *J* = 8.1 Hz), 4.21 (br, 2H), 2.42 (q, *J* = 7.5 Hz, 2H), 1.09 (t, *J* = 7.6 Hz, 3H). <sup>13</sup>C NMR (125 MHz, Chloroform-*d*) δ 146.40, 135.86, 134.16, 131.23, 118.73, 115.40, 27.62, 15.71. **GC-MS** (EI) *m/z*: [M]<sup>+</sup> Calcd for C<sub>8</sub>H<sub>11</sub>NS 153.1; Found 153.0.

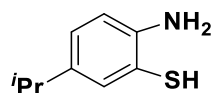

**2-amino-5-isopropylbenzenethiol (1o)**<sup>7</sup>: yellow solid; yield: 417.5 mg (25%)

<sup>1</sup>H NMR (500 MHz, Chloroform-*d*) δ 7.03 (dd, *J* = 8.1, 2.2 Hz, 1H), 7.01 (d, *J* = 2.2 Hz, 1H), 6.67 (d, *J* = 8.1 Hz, 1H), 4.21 (br, 2H), 2.69 (sept, *J* = 6.9 Hz, 1H), 1.11 (d, *J* = 6.9 Hz, 6H). <sup>13</sup>C NMR (125 MHz, Chloroform-*d*) δ 146.45, 138.90, 134.39, 129.76, 118.52, 115.39, 32.91, 24.02. **GC-MS** (EI) *m/z*: [M]<sup>+</sup> Calcd for C<sub>9</sub>H<sub>13</sub>NS 167.1; Found 167.0.

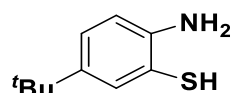

**2-amino-5-(tert-butyl)benzenethiol (1p)**<sup>8</sup>: yellow solid; yield: 326.1 mg (18%)

<sup>1</sup>H NMR (500 MHz, Chloroform-*d*) δ 7.19 – 7.16 (m, 2H), 6.66 (d, *J* = 6.7 Hz, 1H), 4.19 (br, 2H), 1.17 (s, 9H). <sup>13</sup>C NMR (125 MHz, Chloroform-*d*) δ 146.14, 141.33, 133.27, 128.75, 118.08, 115.17, 33.87, 31.36. **GC-MS** (EI) *m/z*: [M]<sup>+</sup> Calcd for C<sub>10</sub>H<sub>15</sub>NS 181.1; Found 181.1.

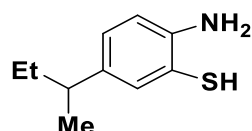

**2-amino-5-(sec-butyl)benzenethiol (1q)**: yellow liquid; yield: 398.4 mg (22%)

<sup>1</sup>H NMR (500 MHz, Chloroform-*d*) δ 7.03 (s, 1H), 6.97 (dd, *J* = 8.2, 2.2 Hz, 1H), 6.64 (d, *J* = 8.2 Hz, 1H), 4.18 (br, 2H), 2.38 (sext, *J* = 7.0 Hz, 1H), 1.51 – 1.40 (m, 2H), 1.11 (d, *J* = 6.9 Hz, 3H), 0.76 (t, *J* = 7.4 Hz, 3H). <sup>13</sup>C NMR (125 MHz, Chloroform-*d*) δ 146.48, 137.81, 134.91, 130.24, 118.68, 115.37, 40.47, 31.17, 21.75, 12.21. **HRMS (FI)** calcd. for C<sub>10</sub>H<sub>15</sub>NS<sup>+</sup> [(M)]<sup>+</sup>: 181.0925, found: 181.0920.

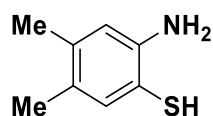

**2-amino-4,5-dimethylbenzenethiol (1r)**<sup>9</sup>: yellow solid; yield: 489.6 mg (32%)

<sup>1</sup>H NMR (500 MHz, Chloroform-*d*) δ 6.93 (s, 1H), 6.54 (s, 1H), 3.97 (br, 2H), 2.17 (s, 3H), 2.05 (s, 3H). <sup>13</sup>C NMR (125 MHz, Chloroform-*d*) δ 146.57, 140.63, 137.50, 126.51,

116.72, 116.50, 19.86, 18.35. **GC-MS** (EI)  $m/z$ :  $[M]^+$  Calcd for  $C_8H_{11}NS$  153.1; Found 153.0.

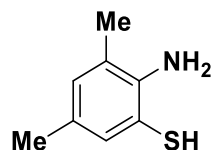

**2-amino-3,5-dimethylbenzenethiol (1s)**<sup>9</sup>: yellow solid; yield: 428.4 mg (28%)

**<sup>1</sup>H NMR** (500 MHz, Chloroform-*d*)  $\delta$  6.90 (s, 1H), 6.86 (s, 1H), 4.17 (br, 2H), 2.15 (s, 3H), 2.13 (s, 3H). **<sup>13</sup>C NMR** (125 MHz, Chloroform-*d*)  $\delta$  144.51, 134.84, 133.54, 126.74, 122.55, 118.78, 20.04, 18.06. **GC-MS** (EI)  $m/z$ :  $[M]^+$  Calcd for  $C_8H_{11}NS$  153.1; Found 153.0.

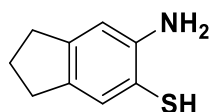

**6-amino-2,3-dihydro-1H-indene-5-thiol (1t)**<sup>9</sup>: yellow solid; yield: 214.6 mg (13%)

**<sup>1</sup>H NMR** (500 MHz, Chloroform-*d*)  $\delta$  7.00 (s, 1H), 6.62 (s, 1H), 4.21 (br, 2H), 2.81 (t,  $J = 7.4$  Hz, 2H), 2.71 (t,  $J = 7.3$  Hz, 2H), 2.01 (quint,  $J = 7.4$  Hz, 2H). **<sup>13</sup>C NMR** (125 MHz, Chloroform-*d*)  $\delta$  148.73, 147.19, 134.19, 132.28, 117.00, 111.19, 33.08, 31.71, 25.66. **GC-MS** (EI)  $m/z$ :  $[M]^+$  Calcd for  $C_9H_{11}NS$  165.1; Found 165.0.

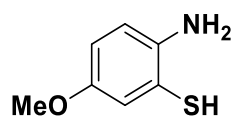

**2-amino-5-methoxybenzenethiol (1u)**<sup>2</sup>: yellow solid; yield: 465 mg, 20% yield (15 mmol of **4u** was used)

**<sup>1</sup>H NMR** (500 MHz, Chloroform-*d*)  $\delta$  6.80 (dd,  $J = 8.7, 3.0$  Hz, 1H), 6.71 – 6.64 (m, 2H), 4.06 (br, 2H), 3.60 (s, 3H). **<sup>13</sup>C NMR** (125 MHz, Chloroform-*d*)  $\delta$  151.82, 142.62, 120.03, 119.36, 119.26, 116.67, 55.76. **GC-MS** (EI)  $m/z$ :  $[M]^+$  Calcd for  $C_7H_9NOS$  155.0; Found 155.0.

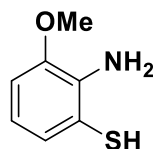

**2-amino-3-methoxybenzenethiol (1v)**<sup>9</sup>: yellow solid; yield: 697.5 mg (45%)

**<sup>1</sup>H NMR** (500 MHz, Chloroform-*d*)  $\delta$  6.85 (dd,  $J = 7.9, 1.3$  Hz, 1H), 6.77 (dd,  $J = 8.0, 1.3$  Hz, 1H), 6.55 (t,  $J = 7.9$  Hz, 1H), 4.49 (br, 2H), 3.85 (s, 3H). **<sup>13</sup>C NMR** (125 MHz, Chloroform-*d*)  $\delta$  146.97, 139.25, 128.11, 118.57, 116.71, 111.63, 55.77. **GC-MS** (EI)  $m/z$ :  $[M]^+$  Calcd for  $C_7H_9NOS$  155.0; Found 155.0.

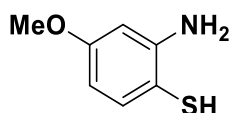

**2-amino-4-methoxybenzenethiol (1w)**<sup>9</sup>: yellow solid; yield: 356.5 mg (45%).

<sup>1</sup>H NMR (500 MHz, Chloroform-*d*)  $\delta$  7.05 (d,  $J = 8.5$  Hz, 1H), 6.24 (d,  $J = 2.6$  Hz, 1H), 6.18 (dd,  $J = 8.5, 2.6$  Hz, 1H), 4.37 (br, 2H), 3.76 (s, 3H). <sup>13</sup>C NMR (125 MHz, Chloroform-*d*)  $\delta$  162.74, 150.17, 138.57, 110.82, 104.77, 99.94, 55.23. **GC-MS** (EI)  $m/z$ : [M]<sup>+</sup> Calcd for C<sub>7</sub>H<sub>9</sub>NOS 155.0; Found 155.0.

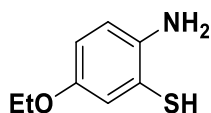

**2-amino-5-ethoxybenzenethiol (1x)**<sup>7</sup>: yellow solid; yield: 743.6 mg (44%)

<sup>1</sup>H NMR (500 MHz, Chloroform-*d*)  $\delta$  6.79 (dd,  $J = 8.7, 2.9$  Hz, 1H), 6.72 (d,  $J = 2.9$  Hz, 1H), 6.66 (d,  $J = 8.7$  Hz, 1H), 4.01 (br, 2H), 3.80 (q,  $J = 7.0$  Hz, 2H), 1.31 (t,  $J = 7.0$  Hz, 3H). <sup>13</sup>C NMR (125 MHz, Chloroform-*d*)  $\delta$  151.14, 142.58, 120.95, 119.93, 119.33, 116.63, 64.09, 14.88. **GC-MS** (EI)  $m/z$ : [M]<sup>+</sup> Calcd for C<sub>8</sub>H<sub>11</sub>NOS 169.1; Found 169.0.

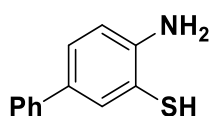

**4-amino-[1,1'-biphenyl]-3-thiol (1y)**<sup>10</sup>: yellow solid; yield: 241.6 mg (24%)

<sup>1</sup>H NMR (500 MHz, Chloroform-*d*)  $\delta$  7.48 – 7.44 (m, 2H), 7.38 – 7.35 (m, 2H), 7.32 – 7.28 (m, 2H), 7.26 – 7.22 (m, 1H), 6.83 (d,  $J = 8.2$  Hz, 1H), 4.47 (br, 2H). <sup>13</sup>C NMR (125 MHz, Chloroform-*d*)  $\delta$  147.94, 140.10, 135.29, 131.55, 130.48, 128.76, 126.56, 126.33, 119.18, 115.77. **GC-MS** (EI)  $m/z$ : [M]<sup>+</sup> Calcd for C<sub>12</sub>H<sub>11</sub>NS 201.1; Found 201.0.

### 3. Screening reaction conditions by using BrCF<sub>2</sub>CO<sub>2</sub>K instead of PDFA

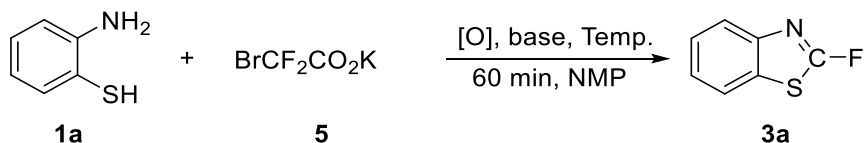

| Entry | Molar Ratio <sup>a</sup> | Temp. (°C) | Solv.       | Yield (%) <sup>b</sup> |
|-------|--------------------------|------------|-------------|------------------------|
| 1     | 1:2.5:2:3                | 50         | NMP         | 27                     |
| 2     | 1:2.5:2:3                | 70         | NMP         | 15                     |
| 3     | 1:2.5:2:3                | 90         | NMP         | 12                     |
| 4     | 1:2.5:2:3                | 110        | NMP         | 33                     |
| 5     | 1:2.5:1:3                | 110        | NMP         | 30                     |
| 6     | 1:2.5:2:3                | 110        | DMF         | 24                     |
| 7     | 1:2.5:2:3                | 110        | THF         | 18                     |
| 8     | 1:2.5:2:3                | 110        | 1,4 dioxane | ND                     |
| 9     | 1:2.5:2:3                | 110        | DMSO        | ND                     |

|    |           |     |         |    |
|----|-----------|-----|---------|----|
| 10 | 1:2.5:2:3 | 110 | toloune | ND |
| 11 | 1:2:2:3   | 110 | NMP     | 30 |
| 12 | 1:3:2:3   | 110 | NMP     | 39 |
| 13 | 1:3:2:2   | 110 | NMP     | 27 |
| 14 | 1:3:2:1   | 110 | NMP     | 39 |
| 15 | 1:3:2:0   | 110 | NMP     | 27 |

Reaction conditions: Substrate **1a** (0.2 mmol), BrCF<sub>2</sub>CO<sub>2</sub>K (**5**), NFSI, and NaH in a solvent (2 mL) under a N<sub>2</sub> atmosphere at the indicated temperature for 60 min. ND = not detected. <sup>a</sup>Molar ratio of **1a**:**5**:NFSI:NaH; <sup>b</sup>The yields were determined by <sup>19</sup>F NMR analysis.

#### 4. General procedure for the synthesis of fluorinated thiazoles

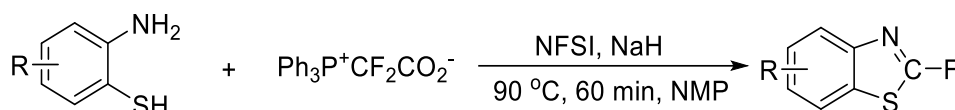

A sealed tube was charged with substrate **1** (0.5 mmol), Ph<sub>3</sub>P<sup>+</sup>CF<sub>2</sub>CO<sub>2</sub><sup>-</sup> (2.5 equiv, 1.25 mmol, 445 mg), NFSI (2 equiv, 1.0 mmol, 315mg), NaH (60% purity, 3 equiv, 1.5 mmol, 60 mg) in NMP (5 mL) under a N<sub>2</sub> atmosphere at 90 °C for 60 min. When the reaction was completed, was quenched by slow addition of 1 mL of H<sub>2</sub>O. Then the mixture was extracted with DCM. After removal of the solvent under vacuum, the residue was purified by flash chromatography on silica gel (using PE and EA as eluent) to obtain the final product **3**.

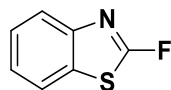

**2-fluorobenzo[d]thiazole (3a)**<sup>12</sup>: colorless liquid; yield: 49.7 mg (65%); <sup>1</sup>H NMR (400 MHz, Chloroform-*d*) δ 7.86 – 7.83 (m, 1H), 7.74 (d, *J* = 8.1 Hz, 1H), 7.49 (td, *J* = 7.8, 1.3 Hz, 1H), 7.41-7.37 (m, 1H). <sup>19</sup>F NMR (375 MHz, Chloroform-*d*) δ -72.31 (s, 1F). <sup>13</sup>C NMR (101 MHz, Chloroform-*d*) δ 168.77 (d, *J* = 286.3 Hz), 146.28 (d, *J* = 18.3 Hz), 132.69, 126.91, 125.49 (d, *J* = 3.7 Hz), 122.91 (d, *J* = 2.7 Hz), 121.82. HRMS(EI) calcd. for C<sub>7</sub>H<sub>4</sub>FNS<sup>+</sup> [(M)]<sup>+</sup>: 153.0048, found: 153.0053.

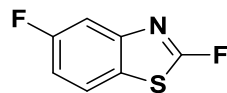

**2,5-difluorobenzo[d]thiazole(3b)**: white solid (m.p.50-51°C); yield: 42.7 mg (50%); <sup>1</sup>H NMR (500 MHz, Chloroform-*d*) δ 7.68 (ddd, *J* = 8.9, 5.1, 1.5 Hz, 1H), 7.55 (dd, *J* = 9.2, 2.6 Hz, 1H), 7.16 (td, *J* = 8.9, 2.5 Hz, 1H). <sup>19</sup>F NMR (470 MHz, Chloroform-*d*) δ -68.94 (s, 1F), -113.65 – -113.76 (m, 1F). <sup>13</sup>C NMR (125 MHz, Chloroform-*d*) δ 170.27 (d, *J* = 287.6 Hz), 162.06 (d, *J* = 244.5 Hz), 147.14 (dd, *J* = 18.7, 12.2 Hz), 127.86 (dd, *J* = 2.6, 1.2 Hz), 122.74 (d, *J* = 9.7 Hz), 114.09 (dd, *J* = 24.7, 3.9 Hz), 109.82 (dd, *J* = 24.4, 2.8 Hz). HRMS (EI) calcd. for C<sub>7</sub>H<sub>3</sub>F<sub>2</sub>NS<sup>+</sup> [(M)]<sup>+</sup>: 170.9954, found: 170.9949.



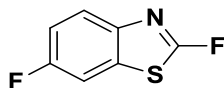

**2,6-difluorobenzo[d]thiazole(3c)<sup>11</sup>**: white solid; yield: 51.2 mg (60%); <sup>1</sup>H NMR (500 MHz, Chloroform-*d*) δ 7.78 (ddd, *J* = 8.9, 4.7, 1.4 Hz, 1H), 7.45 – 7.42 (m, 1H), 7.21 (tdd, *J* = 9.0, 2.8, 1.4 Hz, 1H). <sup>19</sup>F NMR (470 MHz, Chloroform-*d*) δ -71.38 (d, *J* = 10.1 Hz, 1F), -114.59 – -114.69 (m, 1F). <sup>13</sup>C NMR (125 MHz, Chloroform-*d*) δ 167.83 (dd, *J* = 286.8, 2.5 Hz), 160.32 (dd, *J* = 245.8, 4.0 Hz), 142.64 (dd, *J* = 18.7, 2.2 Hz), 133.40 (dd, *J* = 11.0, 4.1 Hz), 124.04 (dd, *J* = 9.2, 3.3 Hz), 115.40 (d, *J* = 24.3 Hz), 108.41 (d, *J* = 27.3 Hz). HRMS (EI) calcd. for C<sub>7</sub>H<sub>3</sub>F<sub>2</sub>NS<sup>+</sup> [(M)]<sup>+</sup>: 170.9954, found: 170.9949.

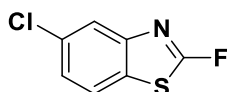

**5-chloro-2-fluorobenzo[d]thiazole(3d)**: white solid (m.p. 47-48 °C); yield: 37.4 mg (40%); <sup>1</sup>H NMR (500 MHz, Chloroform-*d*) δ 7.82 (d, *J* = 2.1 Hz, 1H), 7.64 (dd, *J* = 8.5, 1.4 Hz, 1H), 7.36 (dd, *J* = 8.6, 2.1 Hz, 1H). <sup>19</sup>F NMR (470 MHz, Chloroform-*d*) δ -69.41(s, 1F). <sup>13</sup>C NMR (125 MHz, Chloroform-*d*) δ 169.75 (d, *J* = 288.4 Hz), 147.03 (d, *J* = 18.6 Hz), 133.00, 130.78 (d, *J* = 4.1 Hz), 126.07 (d, *J* = 3.9 Hz), 122.97 (d, *J* = 2.9 Hz), 122.65. HRMS (ESI) calcd. for C<sub>7</sub>H<sub>4</sub>ClNS<sup>+</sup> [(M+H)]<sup>+</sup>:187.9732, found: 187.9731.

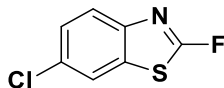

**6-chloro-2-fluorobenzo[d]thiazole(3e)<sup>11</sup>**: white solid; yield: 56.1 mg (60%); <sup>1</sup>H NMR (500 MHz, Chloroform-*d*) δ 7.73 (d, *J* = 8.7 Hz, 1H), 7.70 (t, *J* = 1.8 Hz, 1H), 7.43 (dd, *J* = 8.7, 2.1 Hz, 1H). <sup>19</sup>F NMR (470 MHz, Chloroform-*d*) δ -70.82(s, 1F). <sup>13</sup>C NMR (125 MHz, Chloroform-*d*) δ 168.65 (d, *J* = 288.0 Hz), 144.73 (d, *J* = 18.5 Hz), 133.67 (d, *J* = 4.1 Hz), 131.25 (d, *J* = 4.1 Hz), 127.74, 123.79 (d, *J* = 3.2 Hz), 121.49. HRMS (ESI) calcd. for C<sub>7</sub>H<sub>4</sub>ClNS<sup>+</sup> [(M+H)]<sup>+</sup>:187.9732, found: 187.9731.

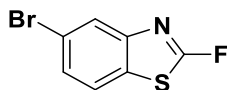

**5-bromo-2-fluorobenzo[d]thiazole(3h)**: white solid (m.p.78-79 °C); yield: 46.2mg (40%); <sup>1</sup>H NMR (500 MHz, Chloroform-*d*) δ 8.00 (d, *J* = 2.0 Hz, 1H), 7.61 (d, *J* = 8.7 Hz, 1H), 7.52 (dd, *J* = 8.5, 2.0 Hz, 1H). <sup>19</sup>F NMR (470 MHz, Chloroform-*d*) δ -69.56(s, 1F). <sup>13</sup>C NMR (125 MHz, Chloroform-*d*) δ 169.52 (d, *J* = 288.6 Hz), 147.29 (d, *J* = 18.6 Hz), 131.36 (d, *J* = 4.1 Hz), 128.73 (d, *J* = 4.0 Hz), 125.94 (d, *J* = 3.1 Hz), 122.94, 120.48. HRMS (ESI) calcd. for C<sub>7</sub>H<sub>4</sub>BrNS<sup>+</sup> [(M+H)]<sup>+</sup>:231.9227, found: 231.9227.

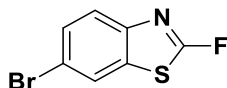

**6-bromo-2-fluorobenzo[d]thiazole(3i):** white solid (m.p.70-71 °C); yield: 53.1 mg (46%);  $^1\text{H NMR}$  (500 MHz, Chloroform-*d*)  $\delta$  7.83 (s, 1H), 7.65 (d,  $J = 8.6$  Hz, 1H), 7.55 (dd,  $J = 8.7, 2.0$  Hz, 1H).  $^{19}\text{F NMR}$  (470 MHz, Chloroform-*d*)  $\delta$  -70.85(s, 1F).  $^{13}\text{C NMR}$  (125 MHz, Chloroform-*d*)  $\delta$  168.69 (d,  $J = 288.2$  Hz), 145.10 (d,  $J = 18.7$  Hz), 134.10 (d,  $J = 4.3$  Hz), 130.48, 124.38, 124.17 (d,  $J = 3.3$  Hz), 118.66 (d,  $J = 3.9$  Hz). **HRMS** (ESI) calcd. for  $\text{C}_7\text{H}_4\text{BrNFS}^+ [(M+H)]^+$ :231.9227, found: 231.9227.

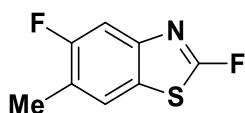

**2,5-difluoro-6-methylbenzo[d]thiazole(3j):** colorless liquid; yield: 44.4 mg (48%);  $^1\text{H NMR}$  (500 MHz, Chloroform-*d*)  $\delta$  7.50 (d,  $J = 7.0$  Hz, 1H), 7.48 (d,  $J = 9.9$  Hz, 1H), 2.38 (d,  $J = 2.2$  Hz, 3H).  $^{19}\text{F NMR}$  (470 MHz, Chloroform-*d*)  $\delta$  -70.88, -117.05 – -117.15 (m).  $^{13}\text{C NMR}$  (125 MHz, Chloroform-*d*)  $\delta$  169.42 (d,  $J = 286.9$  Hz), 160.70 (d,  $J = 243.6$  Hz), 145.09 (dd,  $J = 18.7, 12.4$  Hz), 127.63 (dd,  $J = 3.9, 2.7$  Hz), 124.09 (dd,  $J = 20.3, 3.9$  Hz), 123.19 (d,  $J = 6.0$  Hz), 109.13 (dd,  $J = 25.9, 2.7$  Hz), 14.99 (d,  $J = 4.0$  Hz). **HRMS** (EI) calcd. for  $\text{C}_8\text{H}_5\text{NF}_2\text{S}^+ [(M)]^+$ :185.0111, found: 185.0105.

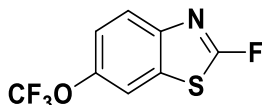

**2-fluoro-6-(trifluoromethoxy)benzo[d]thiazole(3k):** colorless liquid; yield: 59.2 mg (50%) ;  $^1\text{H NMR}$  (500 MHz, Chloroform-*d*)  $\delta$  7.85 (d,  $J = 8.9$  Hz, 1H), 7.63 (s, 1H), 7.36 (dd,  $J = 8.8, 2.4, 1.1$  Hz, 1H).  $^{19}\text{F NMR}$  (470 MHz, Chloroform-*d*)  $\delta$  -58.17 (s, 3F), -69.68 (s, 1F).  $^{13}\text{C NMR}$  (125 MHz, Chloroform-*d*)  $\delta$  168.91 (d,  $J = 288.1$  Hz), 146.50 (q,  $J = 2.2$  Hz), 144.83 (d,  $J = 18.7$  Hz), 133.36 (d,  $J = 4.1$  Hz), 123.93 (d,  $J = 3.2$  Hz), 120.88, 120.46 (q,  $J = 257.8$  Hz), 114.67. **HRMS** (EI) calcd. for  $\text{C}_8\text{H}_3\text{F}_4\text{NOS}^+ [(M)]^+$ :236.9871, found: 236.9866.

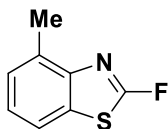

**2-fluoro-4-methylbenzo[d]thiazole(3l):** colorless liquid; yield: 52.6 mg (63%);  $^1\text{H NMR}$  (500 MHz, Chloroform-*d*)  $\delta$  7.57 (td,  $J = 4.6, 0.9$  Hz, 1H), 7.32 – 7.27 (m, 2H), 2.64 (s, 3H).  $^{19}\text{F NMR}$  (470 MHz, Chloroform-*d*)  $\delta$  -72.99(s, 1F).  $^{13}\text{C NMR}$  (125 MHz, Chloroform-*d*)  $\delta$  167.81 (d,  $J = 285.1$  Hz), 145.40 (d,  $J = 17.1$  Hz), 132.87 (d,  $J = 3.2$  Hz), 132.49 (d,  $J = 4.5$  Hz), 127.60, 125.42 (d,  $J = 4.0$  Hz), 119.17, 18.03. **HRMS** (EI) calcd. for  $\text{C}_8\text{H}_6\text{FNS}^+ [(M)]^+$ : 167.0205, found: 167.0199.

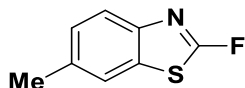

**2-fluoro-6-methylbenzo[d]thiazole(3m)**<sup>12</sup>: colorless liquid; yield: 55.9 mg (67%); <sup>1</sup>H NMR (500 MHz, Chloroform-*d*) δ 7.73 (d, *J* = 8.3 Hz, 1H), 7.53 (s, 1H), 7.32 – 7.28 (m, 1H), 2.48 (s, 3H). <sup>19</sup>F NMR (470 MHz, Chloroform-*d*) δ -73.55(s, 1F). <sup>13</sup>C NMR (125 MHz, Chloroform-*d*) δ 168.14 (d, *J* = 285.7 Hz), 144.15 (d, *J* = 18.3 Hz), 135.72 (d, *J* = 3.9 Hz), 132.75 (d, *J* = 4.4 Hz), 128.37, 122.50 (d, *J* = 3.0 Hz), 121.69, 21.62. HRMS (EI) calcd. for C<sub>8</sub>H<sub>6</sub>FNS<sup>+</sup> [(M)]<sup>+</sup>: 167.0205, found: 167.0199.

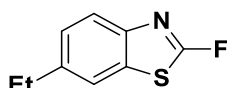

**6-ethyl-2-fluorobenzo[d]thiazole(3n)**: colorless liquid; yield: 58.8 mg (65%); <sup>1</sup>H NMR (500 MHz, Chloroform-*d*) δ 7.73 (d, *J* = 8.3 Hz, 1H), 7.53 (s, 1H), 7.30 (dd, *J* = 8.4, 1.8 Hz, 1H), 2.75 (q, *J* = 7.6 Hz, 2H), 1.28 (t, *J* = 7.6 Hz, 3H). <sup>19</sup>F NMR (470 MHz, Chloroform-*d*) δ -73.38(s, 1F). <sup>13</sup>C NMR (125 MHz, Chloroform-*d*) δ 168.11 (d, *J* = 285.8 Hz), 144.23 (d, *J* = 18.3 Hz), 142.06 (d, *J* = 4.0 Hz), 132.72 (d, *J* = 4.4 Hz), 127.22, 122.53 (d, *J* = 2.9 Hz), 120.46, 28.95, 15.78. HRMS (ESI) calcd. for C<sub>9</sub>H<sub>9</sub>FNS<sup>+</sup> [(M+H)]<sup>+</sup>: 182.0435, found: 182.0435.

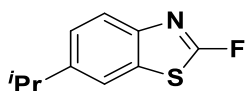

**2-fluoro-6-isopropylbenzo[d]thiazole(3o)**<sup>12</sup>: colorless liquid; yield: 66.3 mg (68%); <sup>1</sup>H NMR (500 MHz, Chloroform-*d*) δ 7.74 (d, *J* = 8.4 Hz, 1H), 7.56 (s, 1H), 7.34 (dd, *J* = 8.5, 1.8 Hz, 1H), 3.01 (sept, *J* = 6.9 Hz, 1H), 1.30 (d, *J* = 6.9 Hz, 6H). <sup>19</sup>F NMR (470 MHz, Chloroform-*d*) δ -73.25(s, 1F). <sup>13</sup>C NMR (125 MHz, Chloroform-*d*) δ 168.14 (d, *J* = 285.6 Hz), 146.74 (d, *J* = 4.1 Hz), 144.34 (d, *J* = 18.3 Hz), 132.75 (d, *J* = 4.6 Hz), 125.89, 122.56 (d, *J* = 2.8 Hz), 119.05, 34.30, 24.15. HRMS (ESI) calcd. for C<sub>10</sub>H<sub>11</sub>FNS<sup>+</sup> [(M+H)]<sup>+</sup>: 196.0591, found: 196.0598.

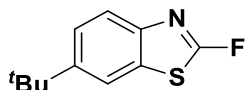

**6-(tert-butyl)-2-fluorobenzo[d]thiazole(3p)**: colorless liquid; yield: 54.5 mg (52%); <sup>1</sup>H NMR (500 MHz, Chloroform-*d*) δ 7.75 (d, *J* = 8.6 Hz, 1H), 7.72 (t, *J* = 1.6 Hz, 1H), 7.52 (dd, *J* = 8.6, 1.8 Hz, 1H), 1.37 (s, 9H). <sup>19</sup>F NMR (470 MHz, Chloroform-*d*) δ -73.02(s, 1F). <sup>13</sup>C NMR (125 MHz, Chloroform-*d*) δ 168.30 (d, *J* = 285.9 Hz), 149.06 (d, *J* = 3.8 Hz), 143.99 (d, *J* = 18.2 Hz), 132.62 (d, *J* = 4.3 Hz), 124.84, 122.24 (d, *J* = 3.0 Hz), 118.05, 35.08, 31.49. HRMS (ESI) calcd for C<sub>11</sub>H<sub>13</sub>FNS<sup>+</sup> [(M+H)]<sup>+</sup>: 210.0748, found: 210.0750.

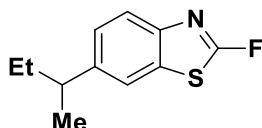

**6-(sec-butyl)-2-fluorobenzo[d]thiazole(3q):** colorless liquid; yield: 41.8 mg (40%);  $^1\text{H NMR}$  (500 MHz, Chloroform-*d*)  $\delta$  7.74 (d,  $J = 8.4$  Hz, 1H), 7.52 (t,  $J = 1.7$  Hz, 1H), 7.29 (dd,  $J = 8.4, 1.8$  Hz, 1H), 2.70 (sext,  $J = 7.0$  Hz, 1H), 1.67 – 1.58 (m, 2H), 1.27 (d,  $J = 7.0$  Hz, 3H), 0.83 (t,  $J = 7.4$  Hz, 3H).  $^{19}\text{F NMR}$  (470 MHz, Chloroform-*d*)  $\delta$  -73.37(s, 1F).  $^{13}\text{C NMR}$  (125 MHz, Chloroform-*d*)  $\delta$  168.12 (d,  $J = 285.7$  Hz), 145.55 (d,  $J = 3.9$  Hz), 144.39 (d,  $J = 18.3$  Hz), 132.72 (d,  $J = 4.4$  Hz), 126.33, 122.52 (d,  $J = 2.9$  Hz), 119.75, 41.85, 31.32, 22.04, 12.20. **HRMS** (ESI) calcd for  $\text{C}_{11}\text{H}_{13}\text{FNS}^+$  [(M+H)] $^+$ : 210.0748, found: 210.0750.

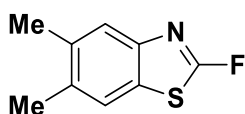

**2-fluoro-5,6-dimethylbenzo[d]thiazole(3r):** white solid (m.p. 217-218 °C); yield: 55.2 mg (61%);  $^1\text{H NMR}$  (500 MHz, Chloroform-*d*)  $\delta$  7.59 (s, 1H), 7.46 (s, 1H), 2.36 (s, 3H), 2.35 (s, 3H).  $^{19}\text{F NMR}$  (470 MHz, Chloroform-*d*)  $\delta$  -73.99(s, 1F).  $^{13}\text{C NMR}$  (125 MHz, Chloroform-*d*)  $\delta$  168.16 (d,  $J = 285.4$  Hz), 144.59 (d,  $J = 18.1$  Hz), 136.12, 134.83 (d,  $J = 4.1$  Hz), 129.78 (d,  $J = 4.2$  Hz), 123.20 (d,  $J = 2.7$  Hz), 121.77, 20.13, 20.06. **HRMS** (EI) calcd. for  $\text{C}_9\text{H}_8\text{FNS}^+$  [(M)] $^+$ : 181.0361, found: 181.0356

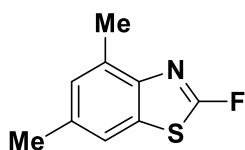

**2-fluoro-4,6-dimethylbenzo[d]thiazole(3s):** colorless liquid; yield: 36.2 mg (40%);  $^1\text{H NMR}$  (500 MHz, Chloroform-*d*)  $\delta$  7.32 (s, 1H), 7.08 (s, 1H), 2.57 (s, 3H), 2.41 (s, 3H).  $^{19}\text{F NMR}$  (470 MHz, Chloroform-*d*)  $\delta$  -74.18(s, 1F).  $^{13}\text{C NMR}$  (125 MHz, Chloroform-*d*)  $\delta$  167.13 (d,  $J = 284.6$  Hz), 143.19 (d,  $J = 17.0$  Hz), 135.47 (d,  $J = 4.0$  Hz), 132.48 (d,  $J = 4.5$  Hz), 132.26 (d,  $J = 3.2$  Hz), 129.08, 118.95, 21.48, 17.95. **HRMS** (EI) calcd. for  $\text{C}_9\text{H}_8\text{FNS}^+$  [(M)] $^+$ : 181.0361, found: 181.0356.

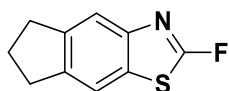

**2-fluoro-6,7-dihydro-5H-indeno[5,6-d]thiazole(3t):** colorless liquid; yield: 55.9 mg (58%);  $^1\text{H NMR}$  (500 MHz, Chloroform-*d*)  $\delta$  7.65 (s, 1H), 7.53 (s, 1H), 3.03-2.97 (m, 4H), 2.14 (quint,  $J = 7.4$  Hz, 2H).  $^{19}\text{F NMR}$  (470 MHz, Chloroform-*d*)  $\delta$  -73.16(s, 1F).  $^{13}\text{C NMR}$  (126 MHz, Chloroform-*d*)  $\delta$  167.90 (d,  $J = 285.3$  Hz), 144.71 (d,  $J = 17.5$  Hz), 143.99, 142.37 (d,  $J = 4.0$  Hz), 130.20 (d,  $J = 4.5$  Hz), 118.45 (d,  $J = 2.7$  Hz), 116.94, 32.87, 32.82, 26.04. **HRMS** (EI) calcd. For  $\text{C}_{10}\text{H}_8\text{NFS}^+$  [(M)] $^+$ : 193.0361, found: 193.0356.

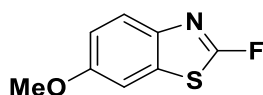

**2-fluoro-6-methoxybenzo[d]thiazole(3u):** white solid (m.p. 64-65 °C); yield: 52.5 mg (58%);  $^1\text{H NMR}$  (500 MHz, Chloroform-*d*)  $\delta$  7.69 (d,  $J = 8.9$  Hz, 1H), 7.18 (dd,  $J = 2.7, 1.4$  Hz, 2H), 7.04 (dd,  $J = 9.0, 2.5$  Hz, 1H), 3.84 (s, 3H).  $^{19}\text{F NMR}$  (470 MHz, Chloroform-*d*)  $\delta$  -74.36(s, 1F).  $^{13}\text{C NMR}$  (125 MHz, Chloroform-*d*)  $\delta$  166.61 (d,  $J = 285.0$  Hz), 157.70 (d,  $J = 3.8$  Hz), 140.08 (d,  $J = 18.3$  Hz), 133.67 (d,  $J = 4.4$  Hz), 123.43 (d,  $J = 2.9$  Hz), 115.43, 105.09, 55.79. **HRMS (ESI)** calcd. for  $\text{C}_8\text{H}_7\text{FNOS}^+$  [(M+H)] $^+$ :184.0227, found: 184.0227.

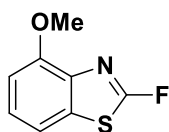

**2-fluoro-4-methoxybenzo[d]thiazole(3v):** white solid (m.p. 45-46 °C); yield: 56.7 mg (62%);  $^1\text{H NMR}$  (500 MHz, Chloroform-*d*)  $\delta$  7.34 – 7.28 (m, 2H), 6.92 (dd,  $J = 7.6, 1.5$  Hz, 1H), 3.99 (s, 3H).  $^{19}\text{F NMR}$  (470 MHz, Chloroform-*d*)  $\delta$  -73.22(s, 1F).  $^{13}\text{C NMR}$  (125 MHz, Chloroform-*d*)  $\delta$  167.44 (d,  $J = 286.9$  Hz), 153.06 (d,  $J = 3.3$  Hz), 135.82 (d,  $J = 17.4$  Hz), 133.90 (d,  $J = 4.3$  Hz), 126.41 (d,  $J = 3.8$  Hz), 113.67, 107.93, 56.06. **HRMS (ESI)** calcd. for  $\text{C}_8\text{H}_7\text{FNOS}^+$  [(M+H)] $^+$ :184.0227, found: 184.0227.

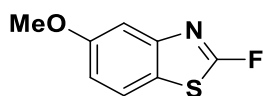

**2-fluoro-5-methoxybenzo[d]thiazole(3w):** white solid (m.p. 50-51 °C); yield: 45.7 mg (50%);  $^1\text{H NMR}$  (500 MHz, Chloroform-*d*)  $\delta$  7.57 (dd,  $J = 8.8, 1.4$  Hz, 1H), 7.34 (d,  $J = 2.6$  Hz, 1H), 7.00 (dd,  $J = 8.9, 2.6$  Hz, 1H), 3.86 (s, 3H).  $^{19}\text{F NMR}$  (470 MHz, Chloroform-*d*)  $\delta$  -73.22(s, 1F).  $^{13}\text{C NMR}$  (125 MHz, Chloroform-*d*)  $\delta$  169.74 (d,  $J = 286.2$  Hz), 159.37, 147.32 (d,  $J = 18.2$  Hz), 123.95 (d,  $J = 4.0$  Hz), 122.18, 114.89 (d,  $J = 4.1$  Hz), 106.33 (d,  $J = 2.3$  Hz), 55.64. **HRMS (ESI)** calcd. for  $\text{C}_8\text{H}_7\text{FNOS}^+$  [(M+H)] $^+$ :184.0227, found: 184.0227.

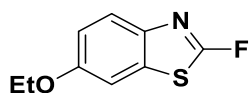

**6-ethoxy-2-fluorobenzo[d]thiazole(3x):** white solid (m.p. 54-55 °C); yield: 59.1 mg (60%);  $^1\text{H NMR}$  (600 MHz, Chloroform-*d*)  $\delta$  7.70 (d,  $J = 8.9$  Hz, 1H), 7.18 (s, 1H), 7.04 (dd,  $J = 8.9, 2.6$  Hz, 1H), 4.06 (q,  $J = 7.1$  Hz, 2H), 1.44 (t,  $J = 7.0$  Hz, 3H).  $^{19}\text{F NMR}$  (470 MHz, Chloroform-*d*)  $\delta$  -74.42(s, 1F).  $^{13}\text{C NMR}$  (125 MHz, Chloroform-*d*)  $\delta$  165.54 (d,  $J = 285.1$  Hz), 156.01 (d,  $J = 3.8$  Hz), 138.96 (d,  $J = 18.4$  Hz), 132.60 (d,  $J = 4.3$  Hz), 122.39 (d,  $J = 3.0$  Hz), 114.87, 104.73, 63.13, 13.75. **HRMS (EI)** calcd. for  $\text{C}_9\text{H}_8\text{FNOS}^+$  [(M)] $^+$ :197.0311, found: 197.0305.

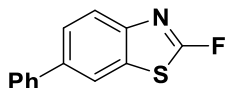

**2-fluoro-6-phenylbenzo[d]thiazole(3y)**: white solid (m.p. 105-106 °C); yield: 63.0 mg (55%);  $^1\text{H NMR}$  (500 MHz, Chloroform-*d*)  $\delta$  7.91 (t,  $J = 1.5$  Hz, 1H), 7.89 (dd,  $J = 8.4, 0.6$  Hz, 1H), 7.70 (dd,  $J = 8.5, 1.7$  Hz, 1H), 7.62-7.59 (m, 2H), 7.50 - 7.46 (m, 2H), 7.42 - 7.38 (m, 1H).  $^{19}\text{F NMR}$  (470 MHz, Chloroform-*d*)  $\delta$  -71.47(s, 1F).  $^{13}\text{C NMR}$  (125 MHz, Chloroform-*d*)  $\delta$  168.70 (d,  $J = 286.9$  Hz), 145.49 (d,  $J = 18.3$  Hz), 140.27, 139.13 (d,  $J = 3.8$  Hz), 133.37 (d,  $J = 4.2$  Hz), 129.01, 127.73, 127.31, 126.43, 123.02 (d,  $J = 3.0$  Hz), 120.17. **HRMS (ESI)** calcd. for  $\text{C}_{13}\text{H}_9\text{FNS}^+$  [(M+H)] $^+$ :230.0435, found: 230.0437.

## 5. Mechanistic Investigations

### 5.1 The absence of NFSI

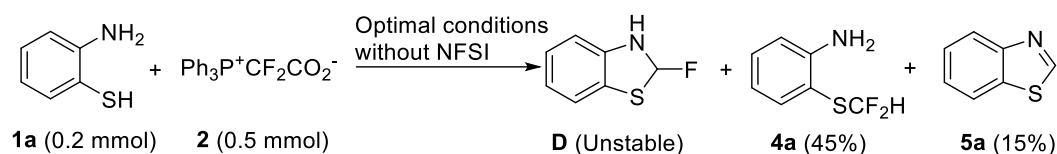

A sealed tube was charged with substrate **1a** (0.2 mmol),  $\text{Ph}_3\text{P}^+\text{CF}_2\text{CO}_2^-$  (2.5 equiv, 0.5 mmol, 178 mg), NaH (60% purity, 3 equiv, 1.5 mmol, 24 mg) and NMP (2 mL) under a  $\text{N}_2$  atmosphere. The resulting mixture was stirred at 90 °C for 60 min.  $\text{PhCF}_3$  (0.2 mmol) was added to the reaction system as an internal standard for the calculation of the  $^{19}\text{F NMR}$  yield of **4a** (45%). The solution was diluted with  $\text{CH}_2\text{Cl}_2$  and washed with water to remove the reaction solvent. The yield of **5a** was determined by  $^1\text{H NMR}$  analysis of the residue (15%). Flash column chromatography ((using PE/EA = 50/1 ~ 30/1 as eluent) gave pure **4a** and **5a**. The purification of **4a** and **5a** is extremely difficult because they have very similar polarity. We tried our best and finally were successful to separate them from each other, but NMR yields rather than isolated yields would be suitable to convey the reaction results due to the loss during isolation.

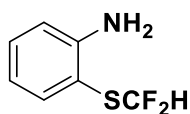

**2-((difluoromethyl)thio)aniline (4a)**<sup>13</sup>: colorless liquid; 45%  $^{19}\text{F NMR}$  yield;  $^1\text{H NMR}$  (500 MHz, Chloroform-*d*)  $\delta$  7.43 (d,  $J = 7.7$  Hz, 1H), 7.25-7.21 (m, 1H), 6.78 - 6.71 (m, 2H), 6.72 (t,  $J = 57.2$  Hz, 1H), 4.41 (br, 2H).  $^{19}\text{F NMR}$  (470 MHz, Chloroform-*d*)  $\delta$  -91.01 (d,  $J = 57.3$  Hz, 2F). **GC-MS (EI)** m/z: [M] $^+$  Calcd for  $\text{C}_7\text{H}_7\text{F}_2\text{NS}$  175.0; Found 175.1.

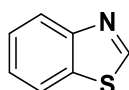

**Benzo[d]thiazole (5a)**<sup>14</sup>: colorless liquid; yield: 15%  $^1\text{H NMR}$  yield;  $^1\text{H NMR}$  (500 MHz, Chloroform-*d*)  $\delta$  9.00 (s, 1H), 8.15 (d,  $J = 8.2$  Hz, 1H), 7.97 (d,  $J = 7.9$  Hz, 1H), 7.54-7.51 (m, 1H), 7.45 (t,  $J = 7.6$  Hz, 1H). **GC-MS (EI)** m/z: [M] $^+$  Calcd for  $\text{C}_7\text{H}_5\text{NS}$  135.0; Found 135.0.

## 5.2 The observation of **D** by HRMS

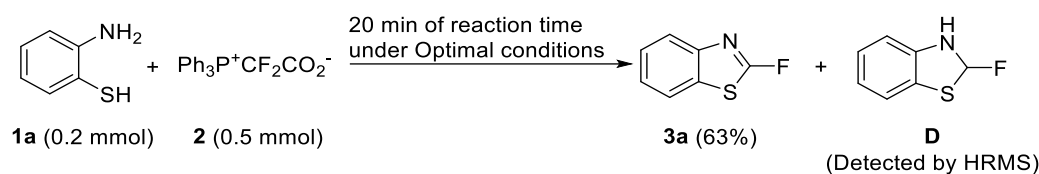

A sealed tube was charged with substrate **1a** (0.2 mmol),  $\text{Ph}_3\text{P}^+\text{CF}_2\text{CO}_2^-$  (2.5 equiv, 0.5 mmol, 178 mg), NaH (60% purity, 3 equiv, 1.5 mmol, 24 mg) and NMP (2 mL) under a  $\text{N}_2$  atmosphere. The resulting mixture was stirred at 90 °C for 20 min. The reaction mixture was analyzed by high resolution mass spectrometer (EI) mode. Intermediate **D** was detected. **HRMS (EI)** calcd. for  $\text{C}_7\text{H}_6\text{FNS}^+$   $[\text{M}]^+$ : 155.0199, found: 155.0204.

## 6. References

- 1 R. V. Patel, P. K. Patel, P. Kumari, D. P. Rajani and K. H. Chikhaliya, *Eur. J. Med. Chem.*, 2012, **53**, 41–51.
- 2 C. Yin, T. Yang, Y. Pan, J. Wen and X. Zhang, *Org. Lett.*, 2020, **22**, 920–923.
- 3 W.-C. Chang, A. T. Hu, J.-P. Duan, D. K. Rayabarapu and C.-H. Cheng, *J. Organomet. Chem.*, 2004, **689**, 4882–4888.
- 4 M. Kumar, K. Sharma, A. K. Fogla, K. Sharma and M. Rathore, *Res. Chem. Intermed.*, 2013, **39**, 2555–2564.
- 5 M. L. Calabrò, R. Caputo, R. Ettari, G. Puia, F. Ravazzini, M. Zappalà and N. Micale, *Med. Chem. Res.*, 2013, **22**, 6089–6095.
- 6 X. Wu, H. Shen, Y. Zhang, C. Wang, Q. Li, C. Zhang, X. Zhuang, C. Li, Y. Shi, Y. Xing, Q. Xiang, J. Xu, D. Wu, J. Liu and Y. Xu, *J. Med. Chem.*, 2021, **64**, 8775–8797.
- 7 H. Yanagisawa, K. Fujimoto, Y. Shimoji, T. Kanazaki, K. Mizutari, H. Nishino, H. Shiga and H. Koike, *Chem. Pharm. Bull. (Tokyo)*, 1992, **40**, 2055–2061.
- 8 G. M. Fischer, M. Isomäki-Kron Dahl, I. Göttker-Schnetmann, E. Daltrozzo and A. Zumbusch, *Chem. - Eur. J.*, 2009, **15**, 4857–4864.
- 9 M. Kajino, K. Mizuno, H. Tawada, Y. Shibouta, K. Nishikawa and K. Meguro, *Chem. Pharm. Bull. (Tokyo)*, 1991, **39**, 2888–2895.
- 10 D. Xue, Q. Ge, X. Zhi, S. Song and L. Shao, *Tetrahedron*, 2022, **121**, 132927.
- 11 M. Calafell, J. Elguero and A. Fruchier, *Org. Magn. Reson.*, 1975, **7**, 84–85.
- 12 M. Arisawa, S. Tanii, T. Tazawa and M. Yamaguchi, *Chem. Commun.*, 2016, **52**, 11390–11393.
- 13 N. B. Heine and A. Studer, *Org. Lett.*, 2017, **19**, 4150–4153.
- 14 J. K. Laha, M. K. Hunjan, T. Maity and A. Hazra, *Adv. Synth. Catal.*, 2023, **365**, 1238–1246.

## 7. Copies of NMR Spectra

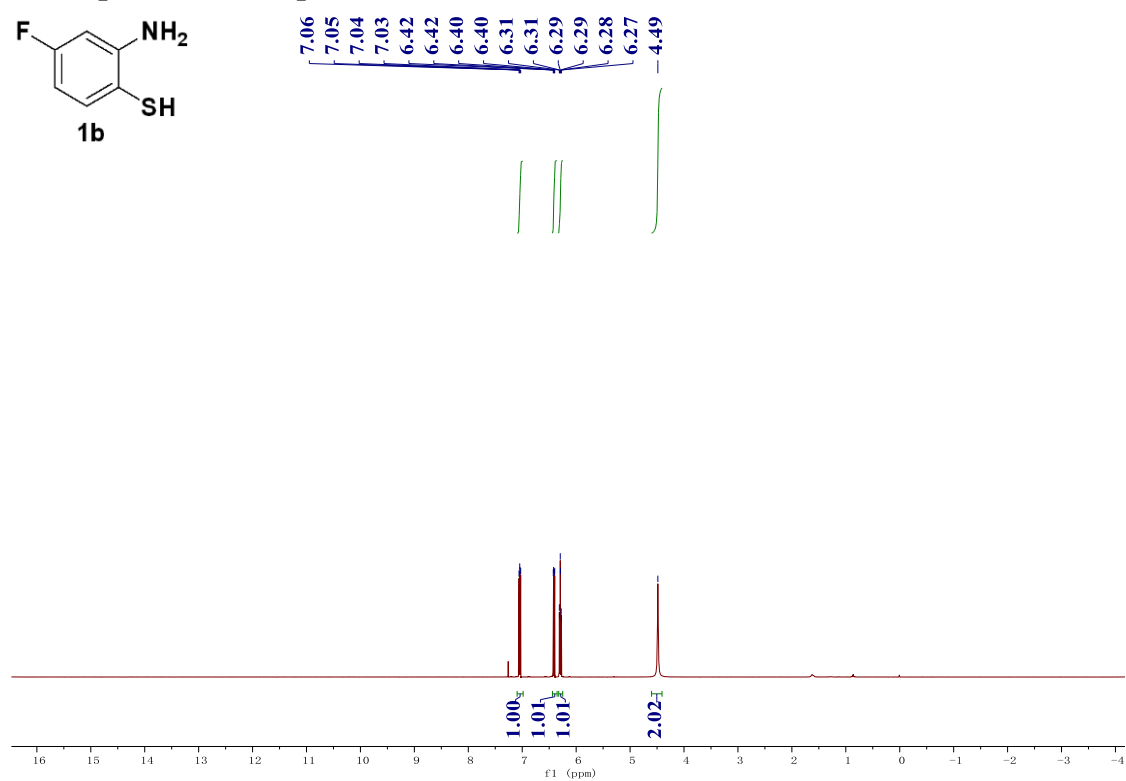

**Fig. 1**  $^1\text{H}$  NMR of **1b** in  $\text{CDCl}_3$

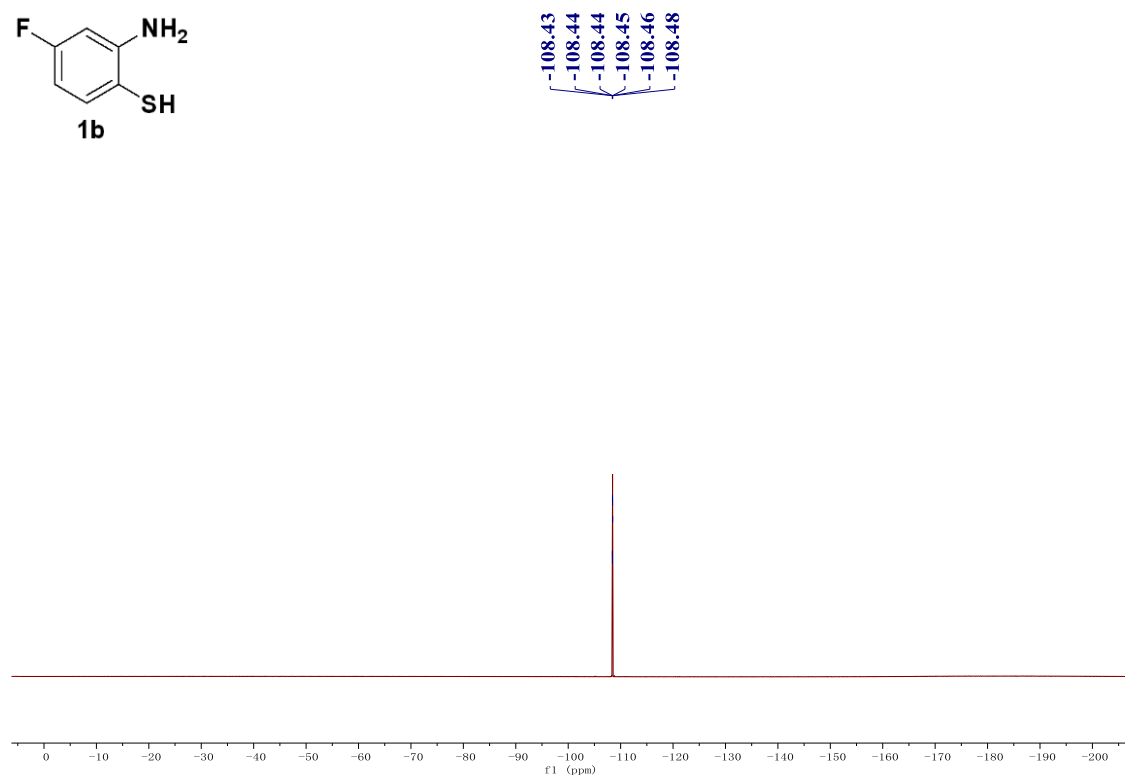

**Fig. 2**  $^{19}\text{F}$  NMR of **1b** in  $\text{CDCl}_3$



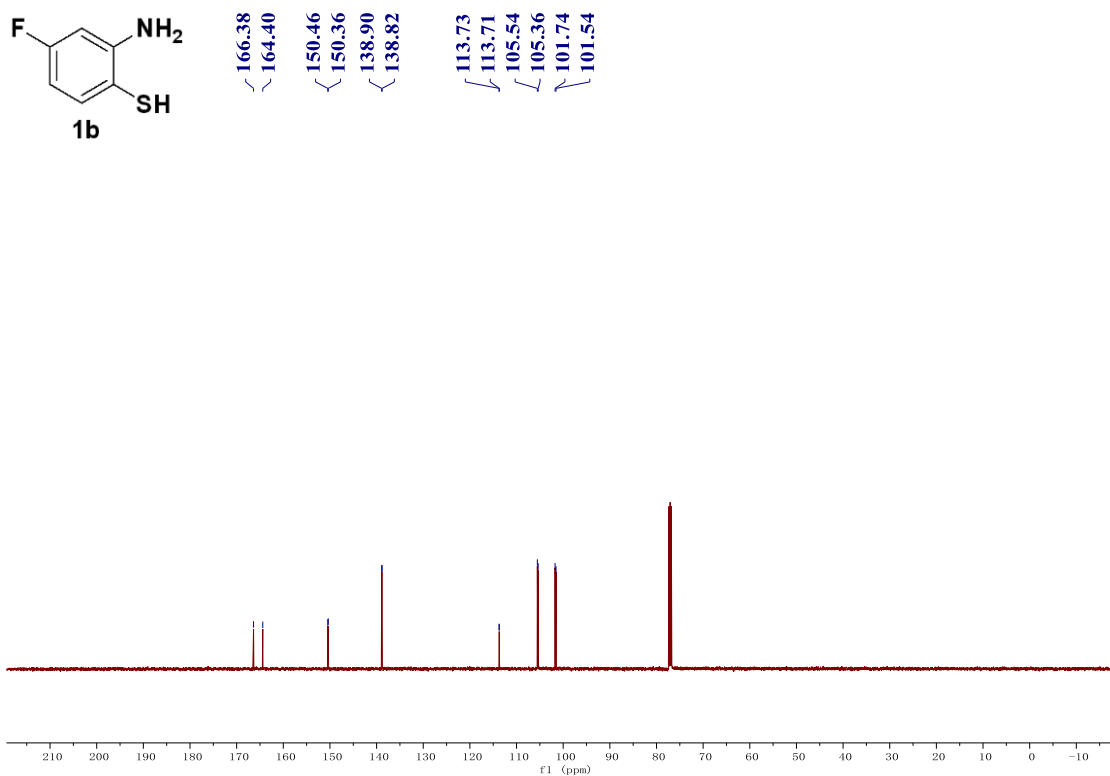

**Fig. 3**  $^{13}\text{C}$  NMR of **1b** in  $\text{CDCl}_3$

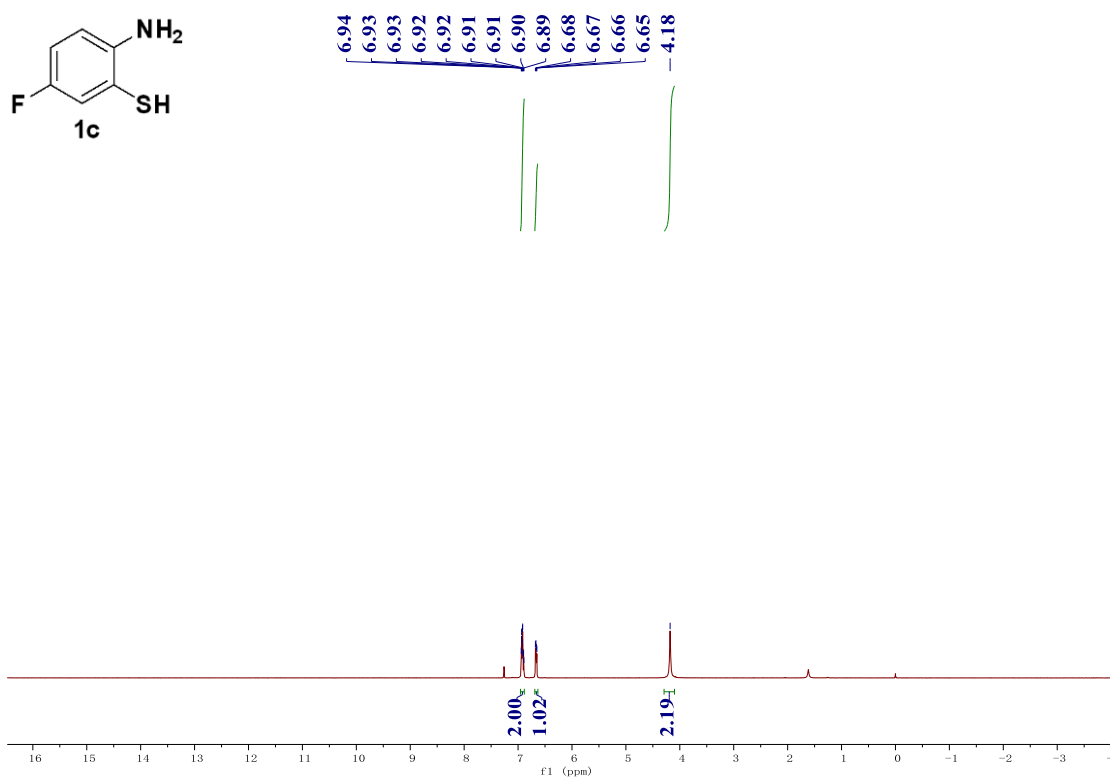

**Fig.4**  $^1\text{H}$  NMR of **1c** in  $\text{CDCl}_3$

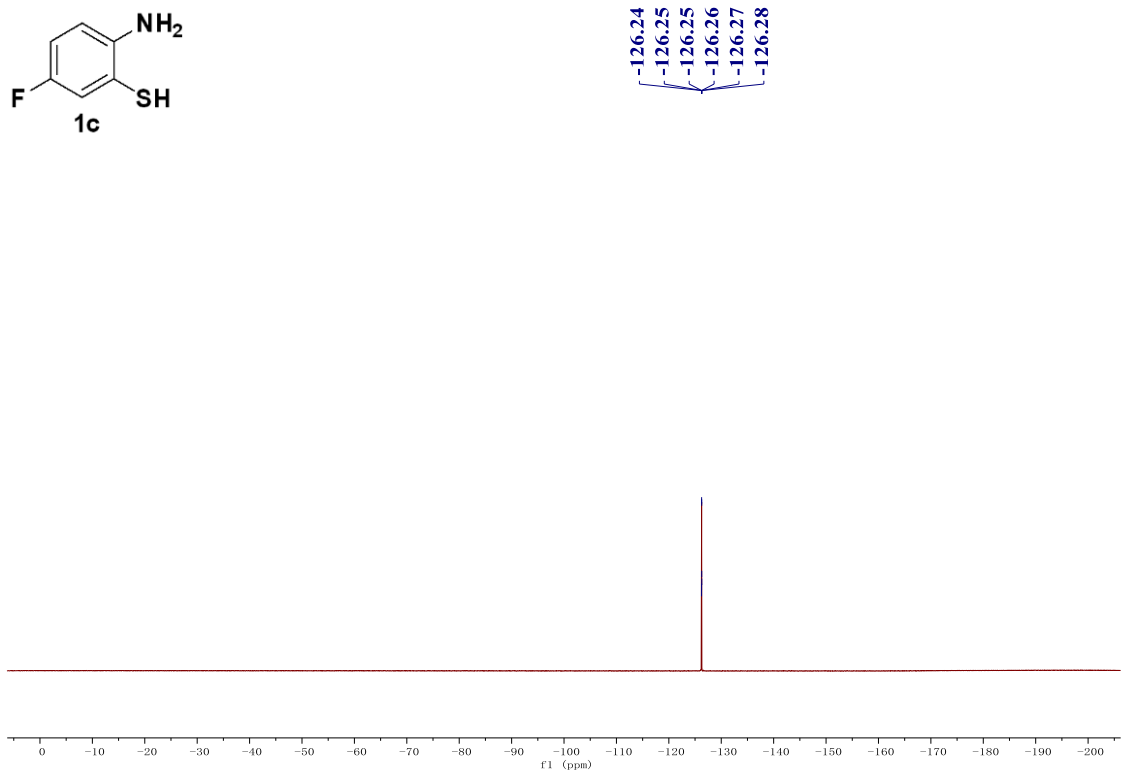

Fig. 5  $^{13}\text{C}$  NMR of **1c** in  $\text{CDCl}_3$

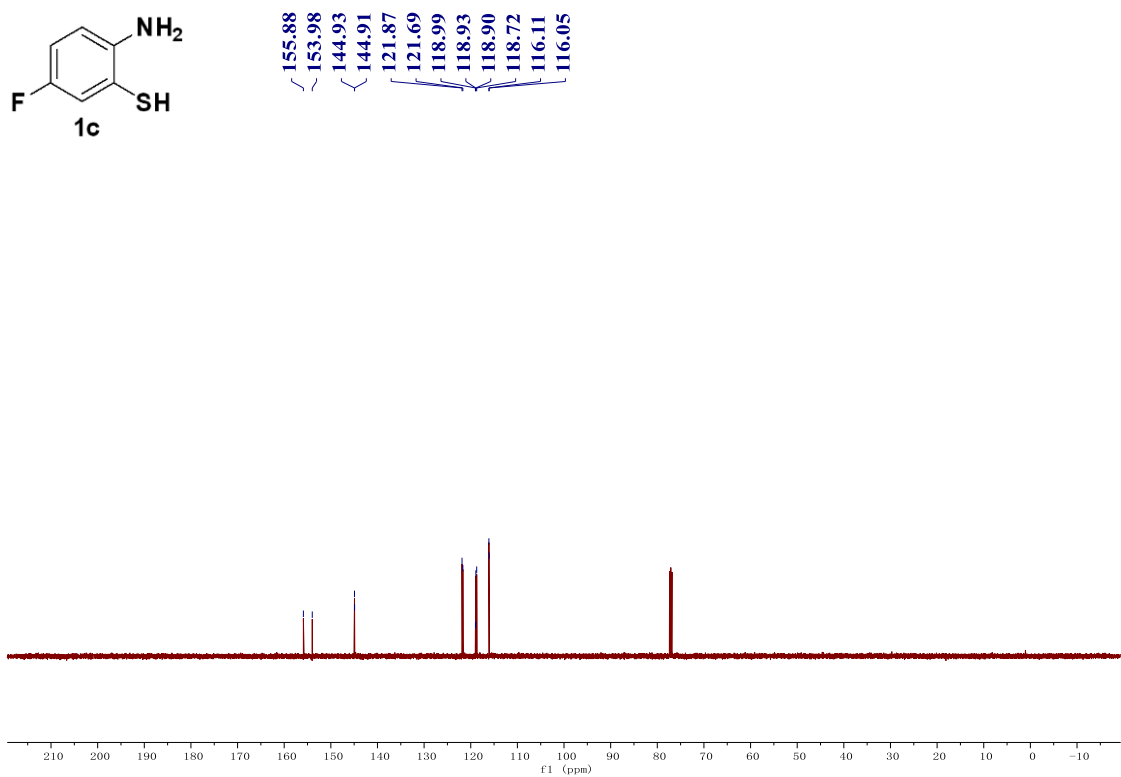

Fig. 6  $^{13}\text{C}$  NMR of **1c** in  $\text{CDCl}_3$

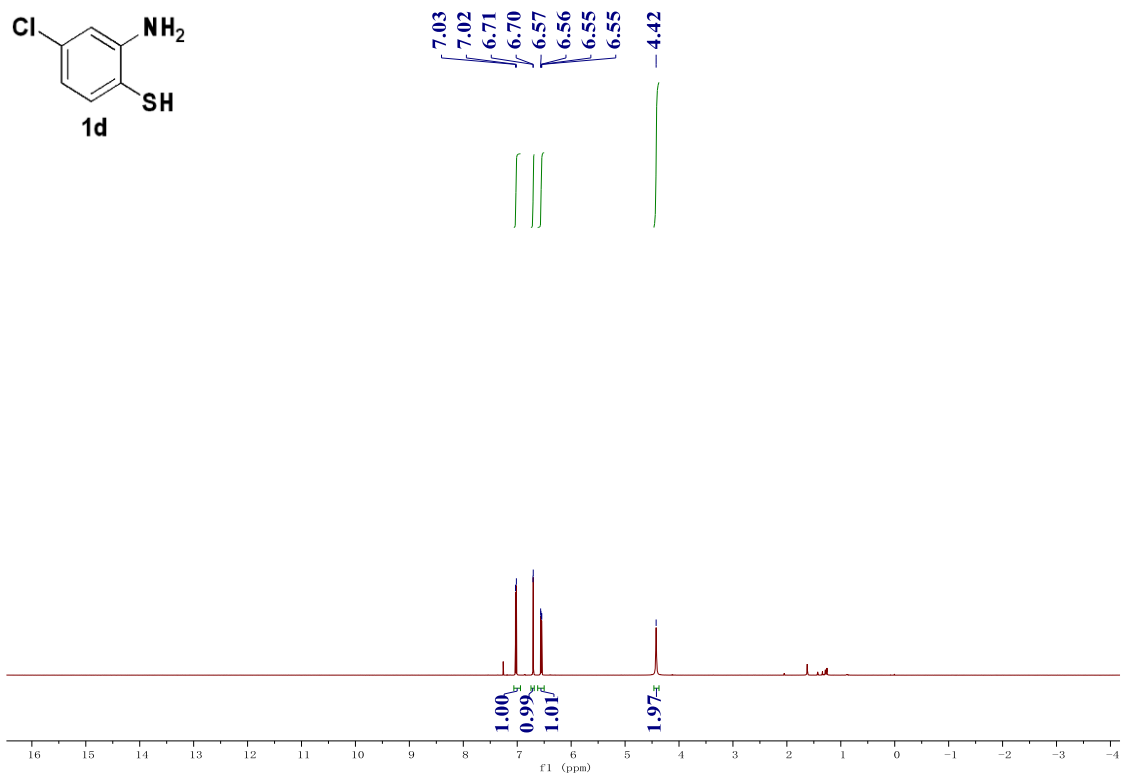

**Fig. 7**  $^1\text{H NMR}$  of **1d** in  $\text{CDCl}_3$

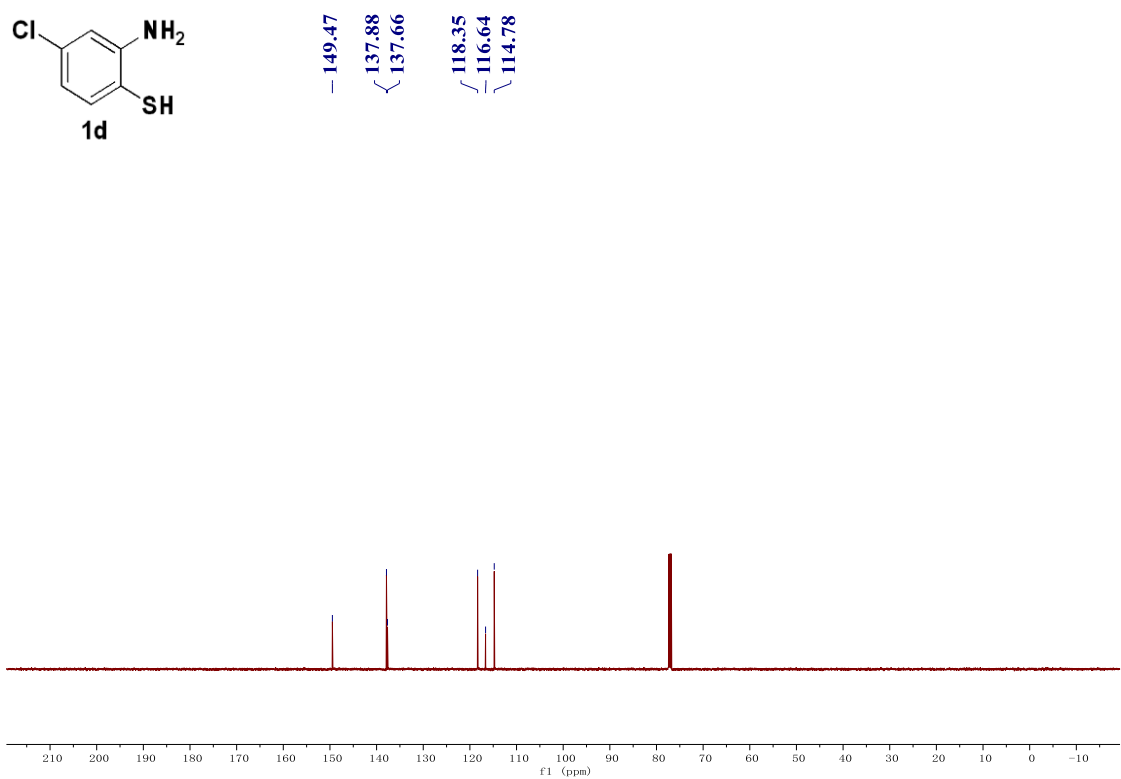

**Fig. 8**  $^{13}\text{C NMR}$  of **1d** in  $\text{CDCl}_3$

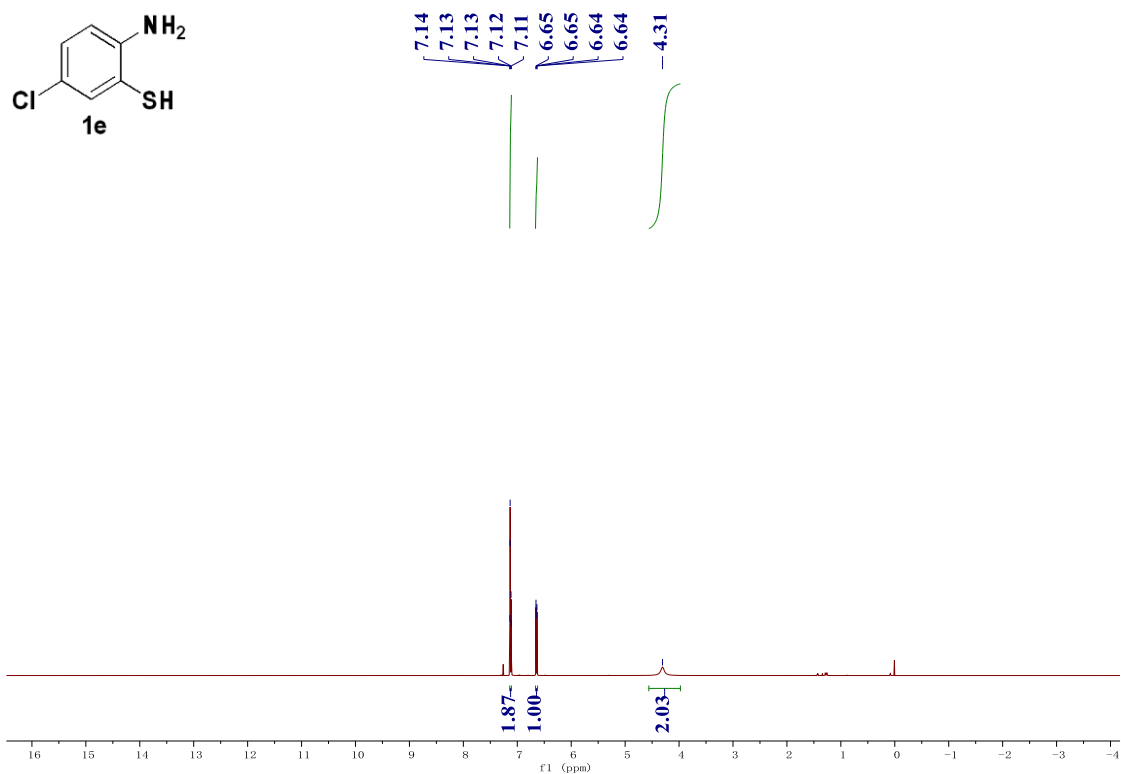

**Fig. 9**  $^1\text{H NMR}$  of **1e** in  $\text{CDCl}_3$

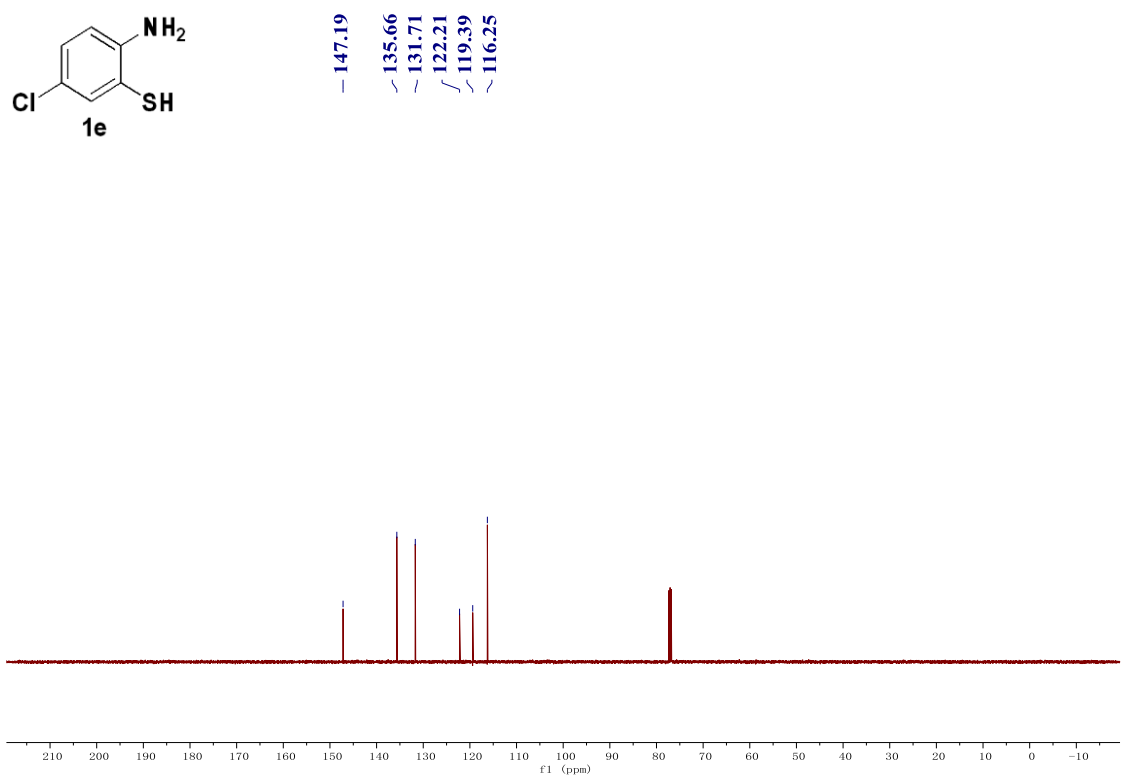

**Fig. 10**  $^{13}\text{C NMR}$  of **1e** in  $\text{CDCl}_3$

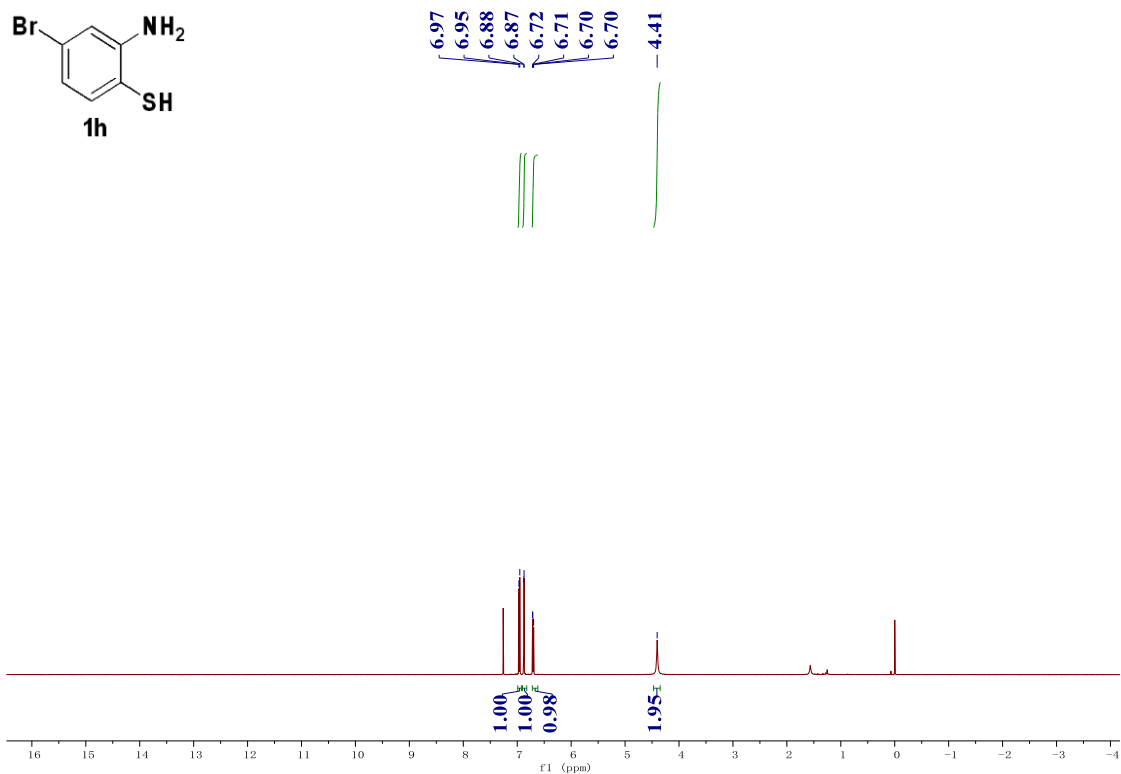

**Fig. 11**  $^1\text{H}$  NMR of **1h** in  $\text{CDCl}_3$

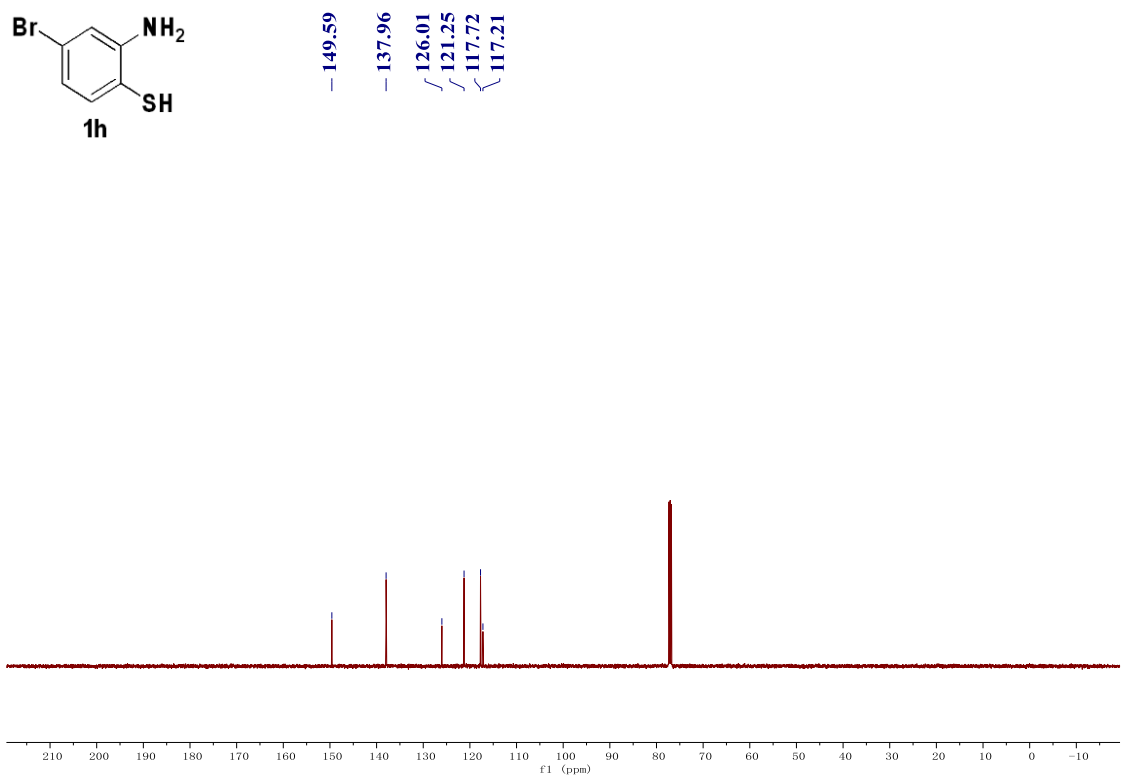

**Fig. 12**  $^{13}\text{C}$  NMR of **1h** in  $\text{CDCl}_3$

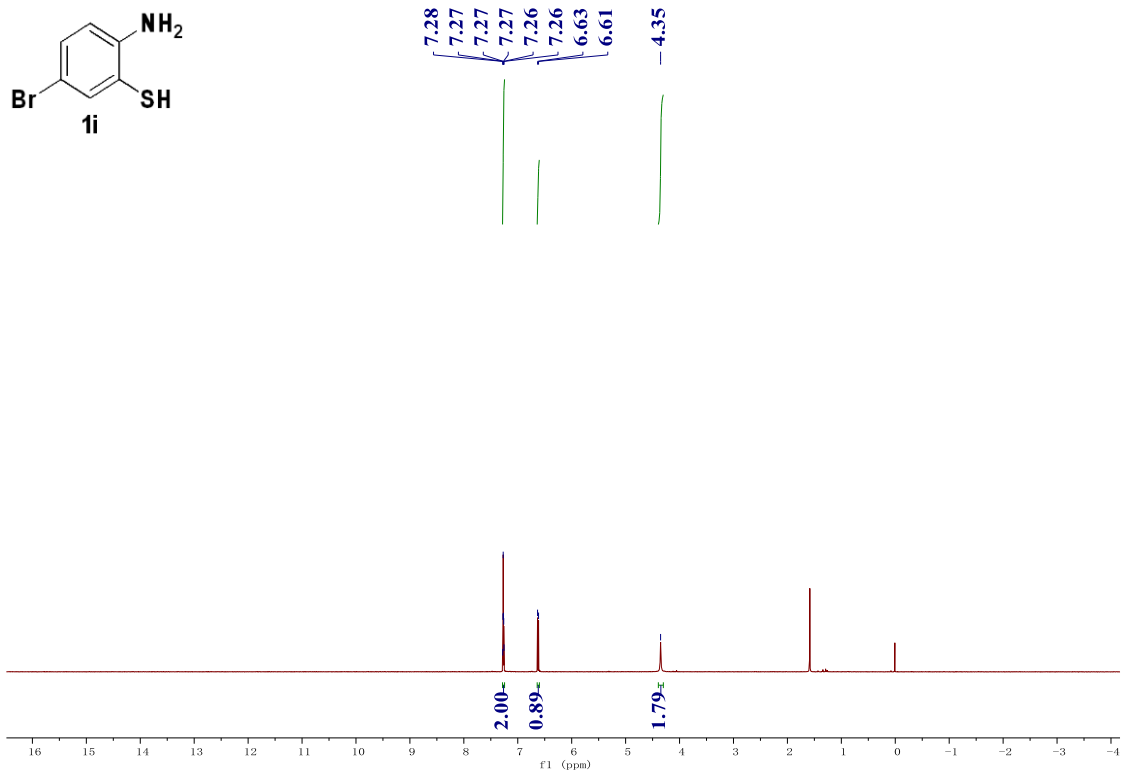

**Fig. 13**  $^1\text{H NMR}$  of **1i** in  $\text{CDCl}_3$

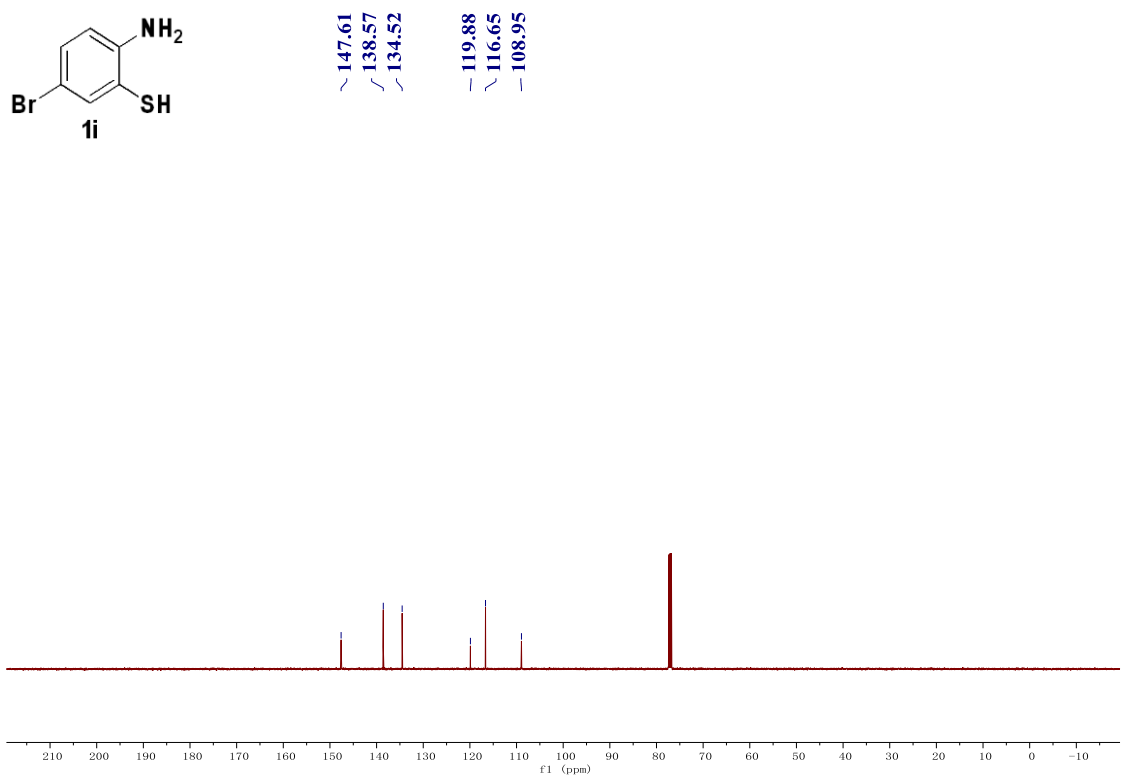

**Fig. 14**  $^{13}\text{C NMR}$  of **1i** in  $\text{CDCl}_3$

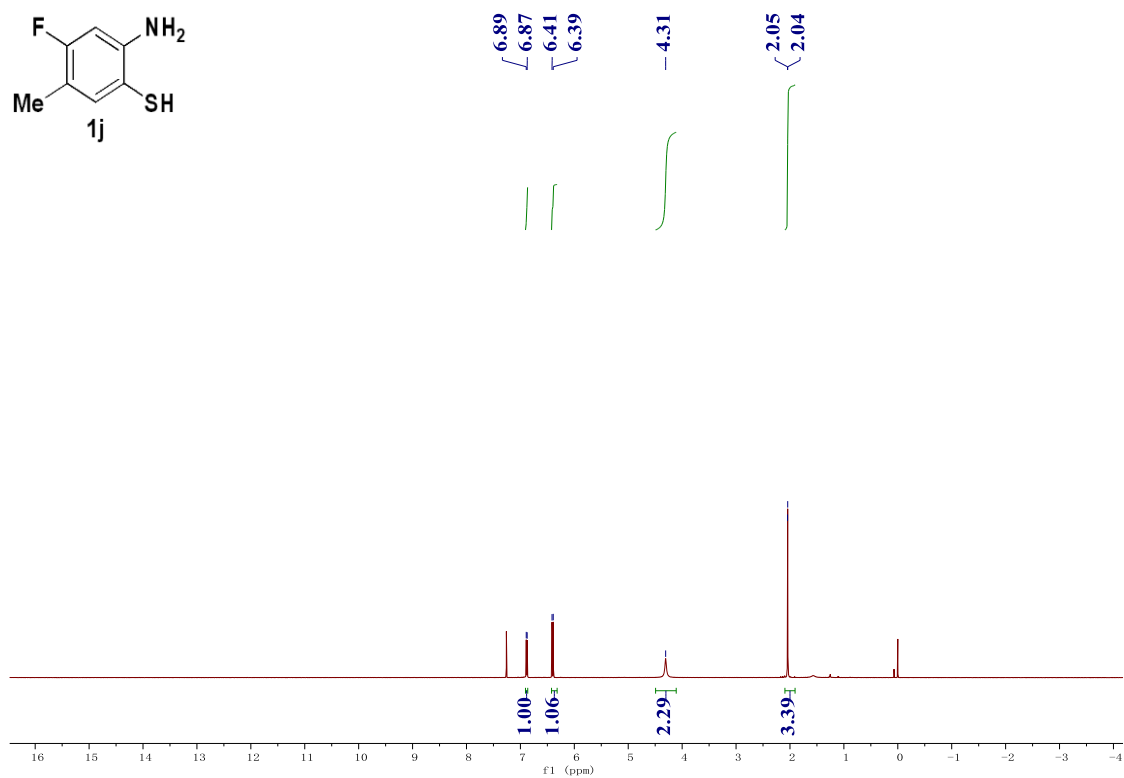

**Fig. 15**  $^1\text{H}$  NMR of **1j** in  $\text{CDCl}_3$

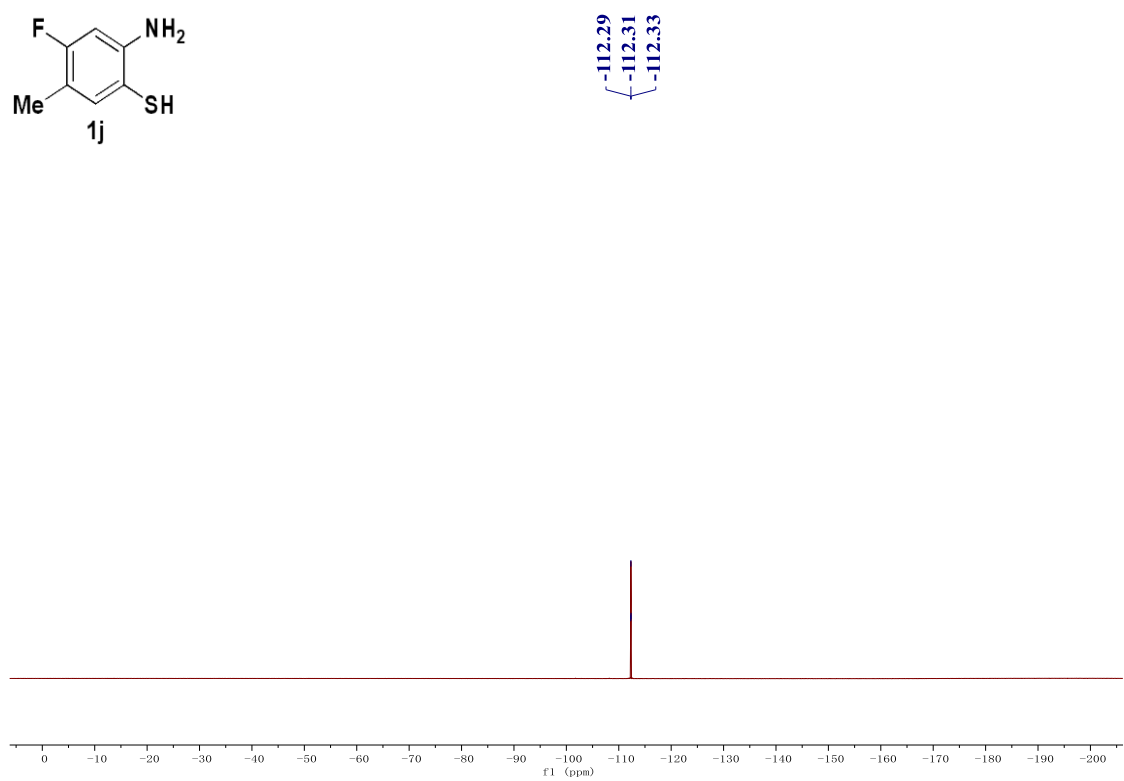

**Fig.16**  $^{19}\text{F}$  NMR of **1j** in  $\text{CDCl}_3$

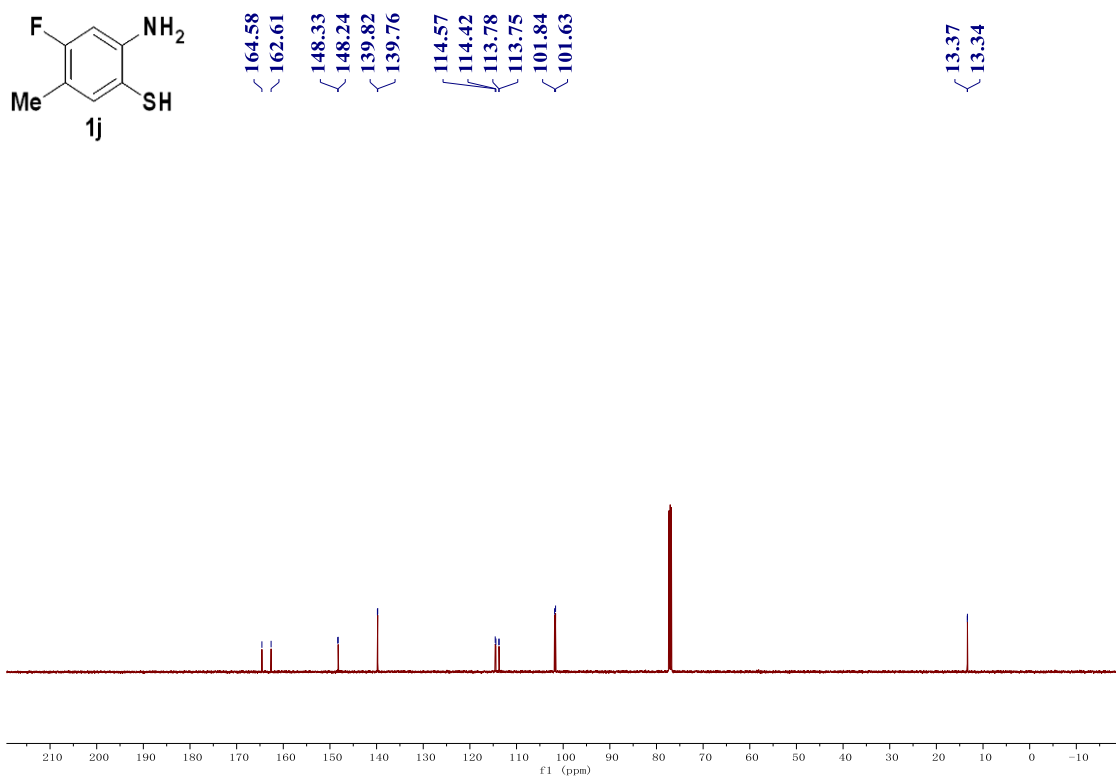

**Fig. 17**  $^{13}\text{C}$  NMR of **1j** in  $\text{CDCl}_3$

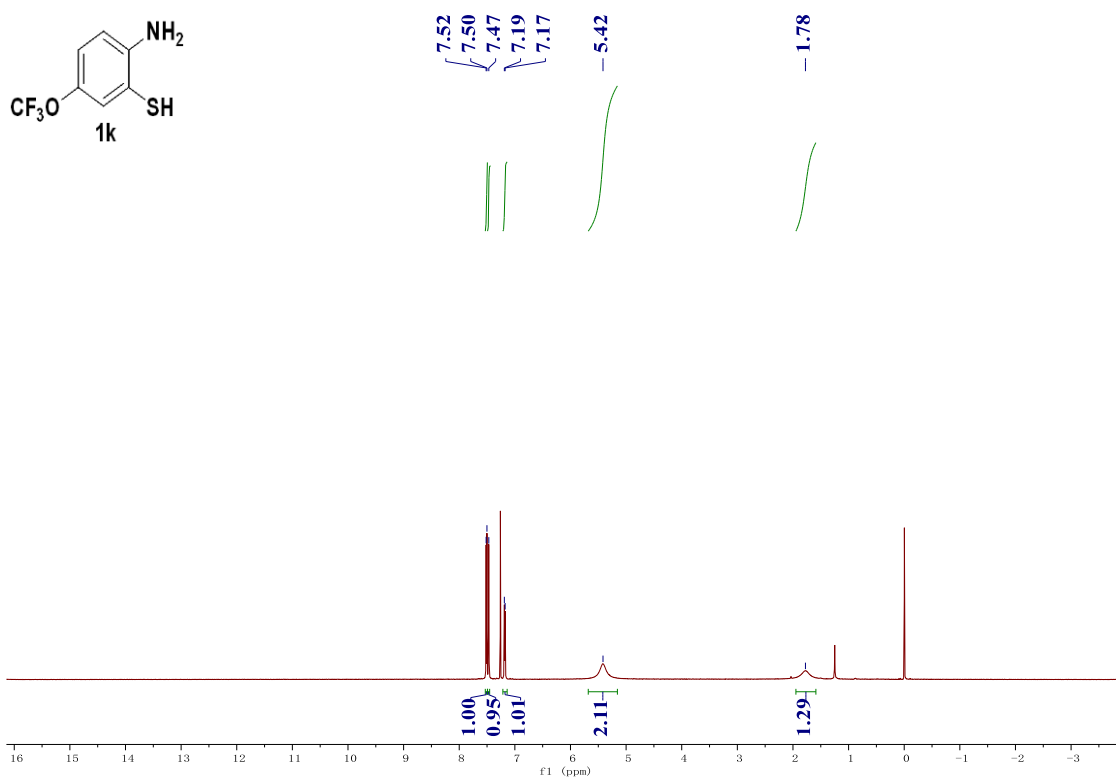

**Fig. 18**  $^1\text{H}$  NMR of **1k** in  $\text{CDCl}_3$



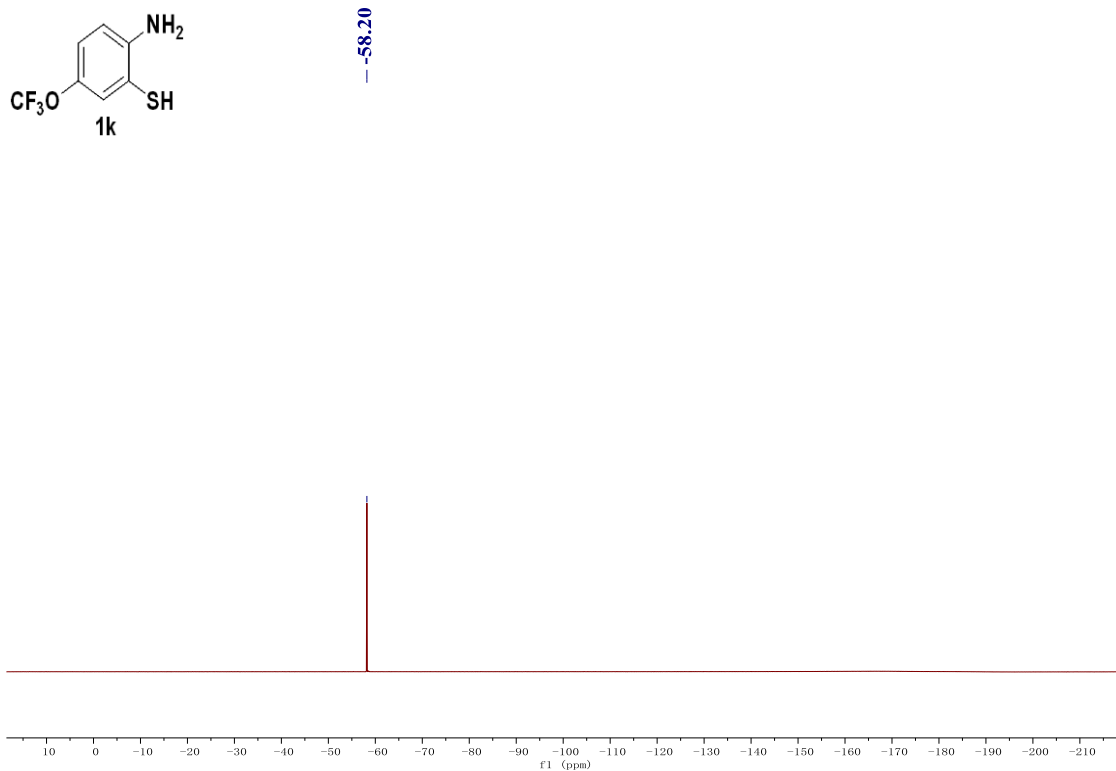

**Fig. 19**  $^{19}\text{F}$  NMR of **1k** in  $\text{CDCl}_3$

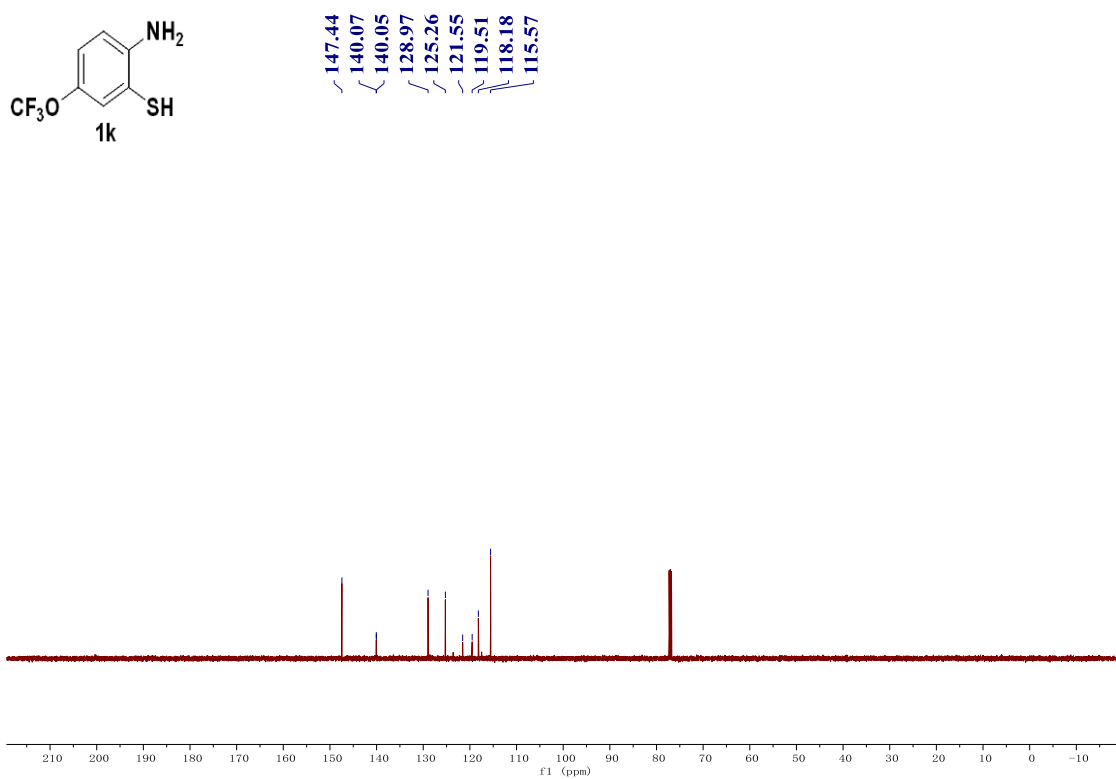

**Fig. 20**  $^{13}\text{C}$  NMR of **1k** in  $\text{CDCl}_3$

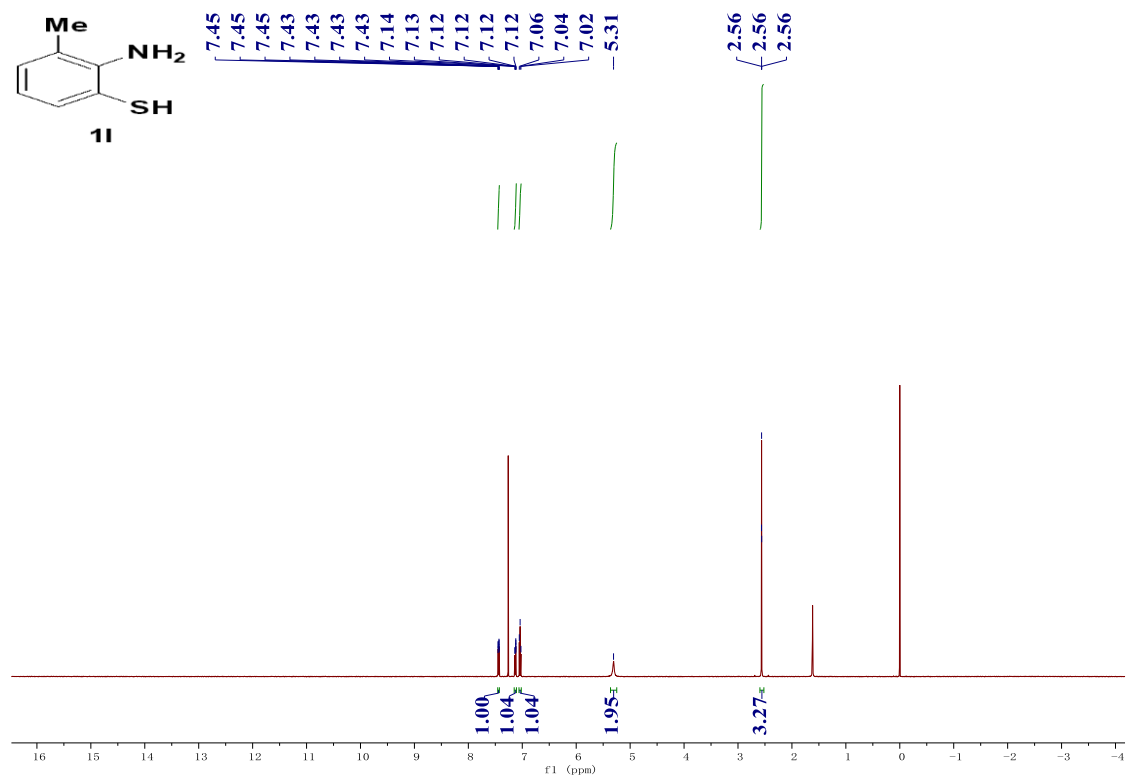

**Fig. 21**  $^1\text{H NMR}$  of **11** in  $\text{CDCl}_3$

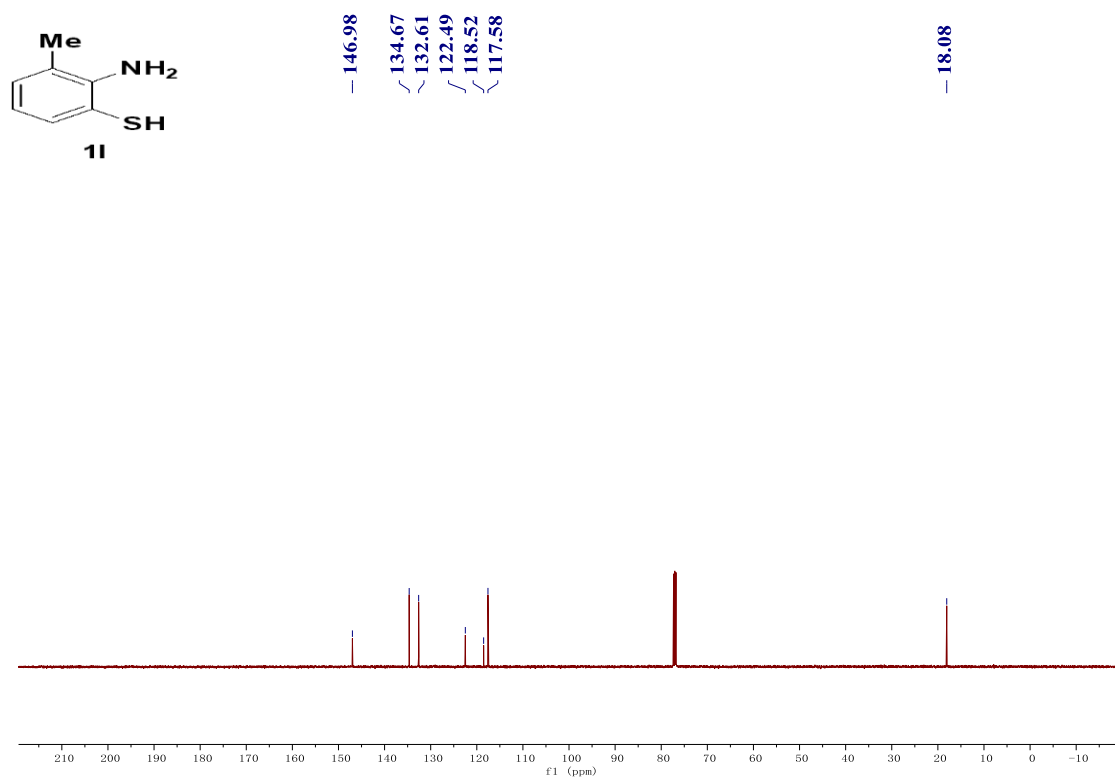

**Fig. 22**  $^{13}\text{C NMR}$  of **11** in  $\text{CDCl}_3$

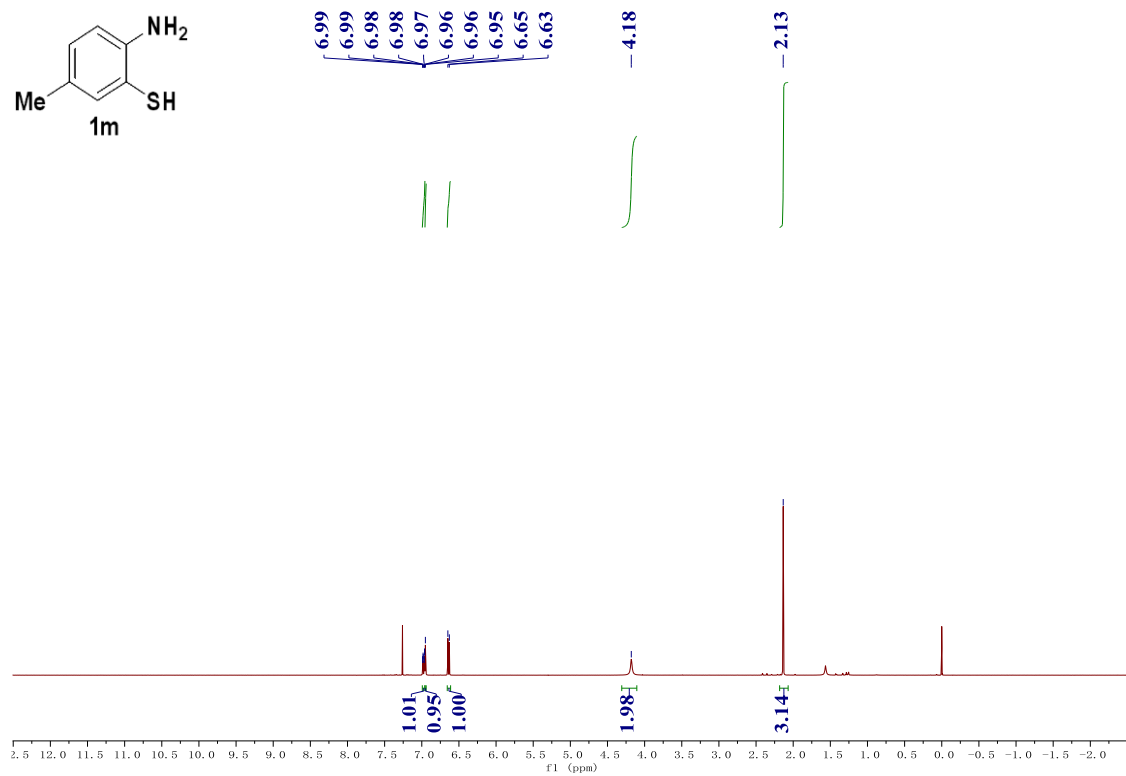

**Fig. 23**  $^1\text{H NMR}$  of **1m** in  $\text{CDCl}_3$

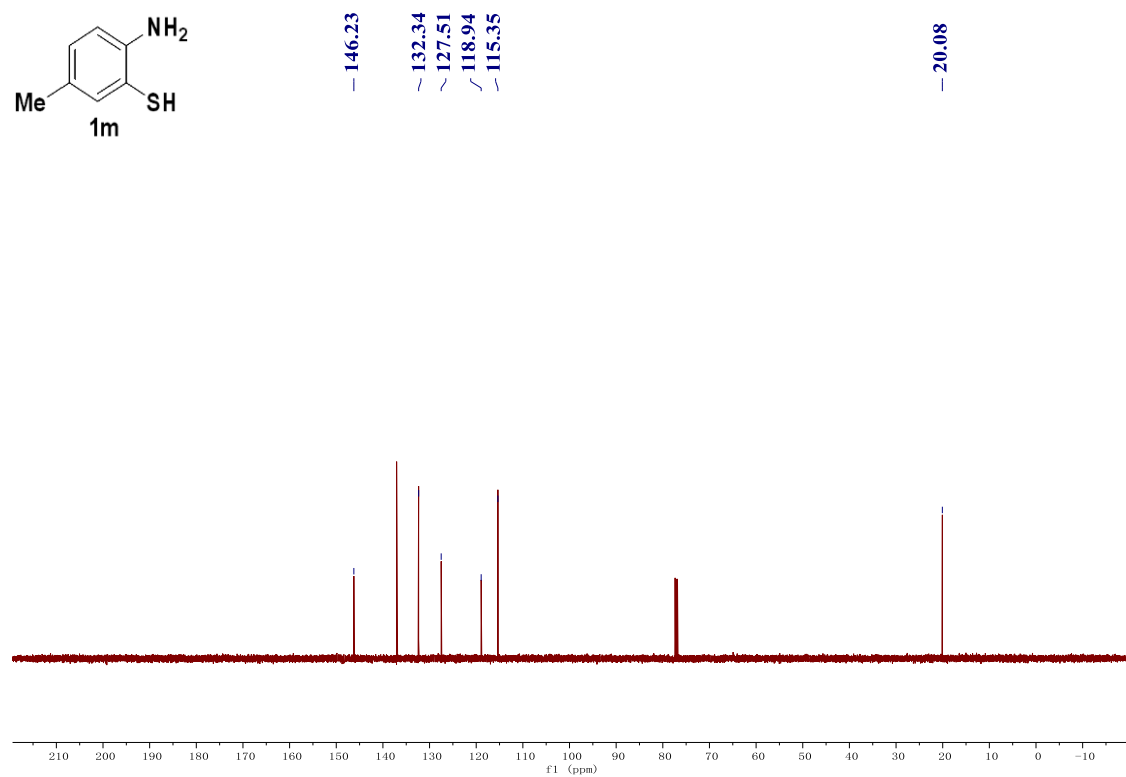

**Fig. 24**  $^{13}\text{C NMR}$  of **1m** in  $\text{CDCl}_3$

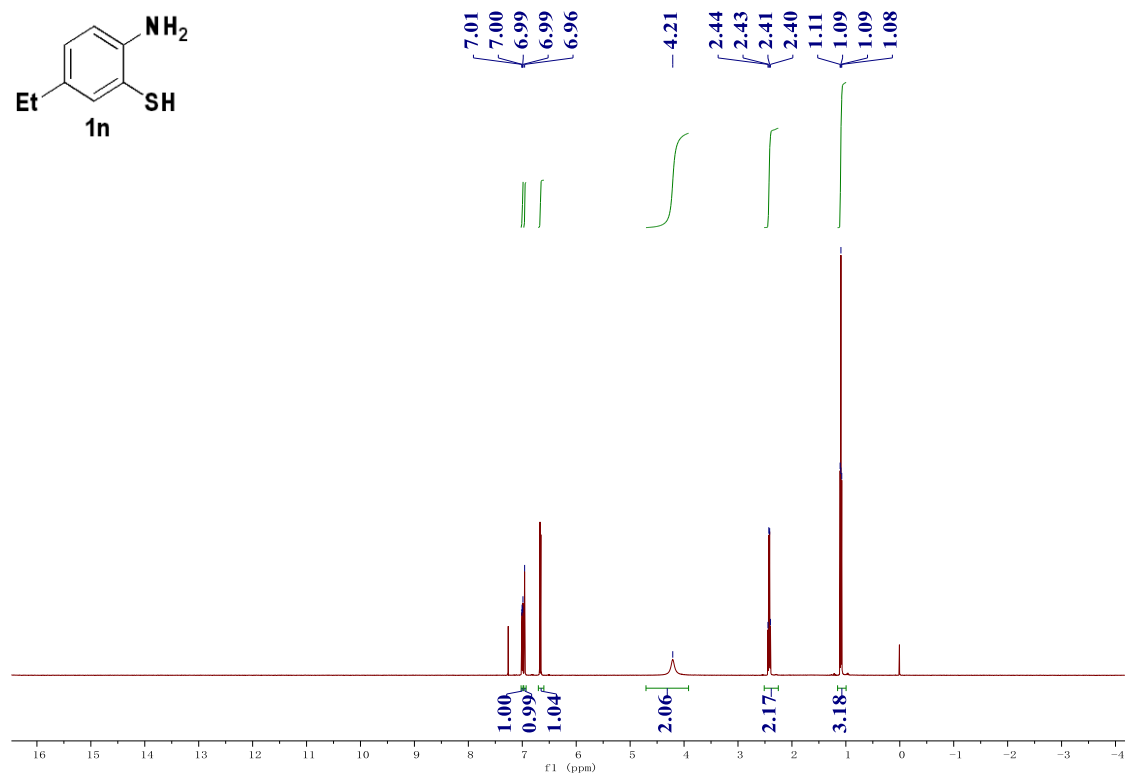

**Fig. 25**  $^1\text{H}$  NMR of **1n** in  $\text{CDCl}_3$

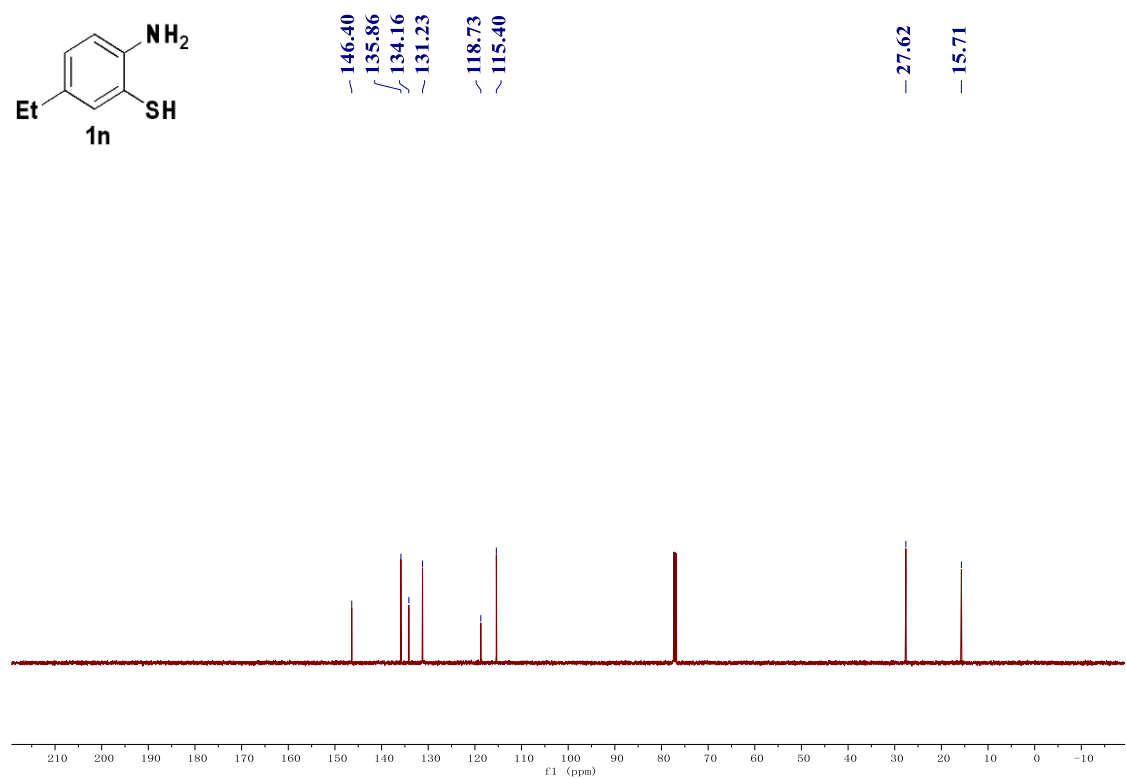

**Fig. 26**  $^{13}\text{C}$  NMR of **1n** in  $\text{CDCl}_3$

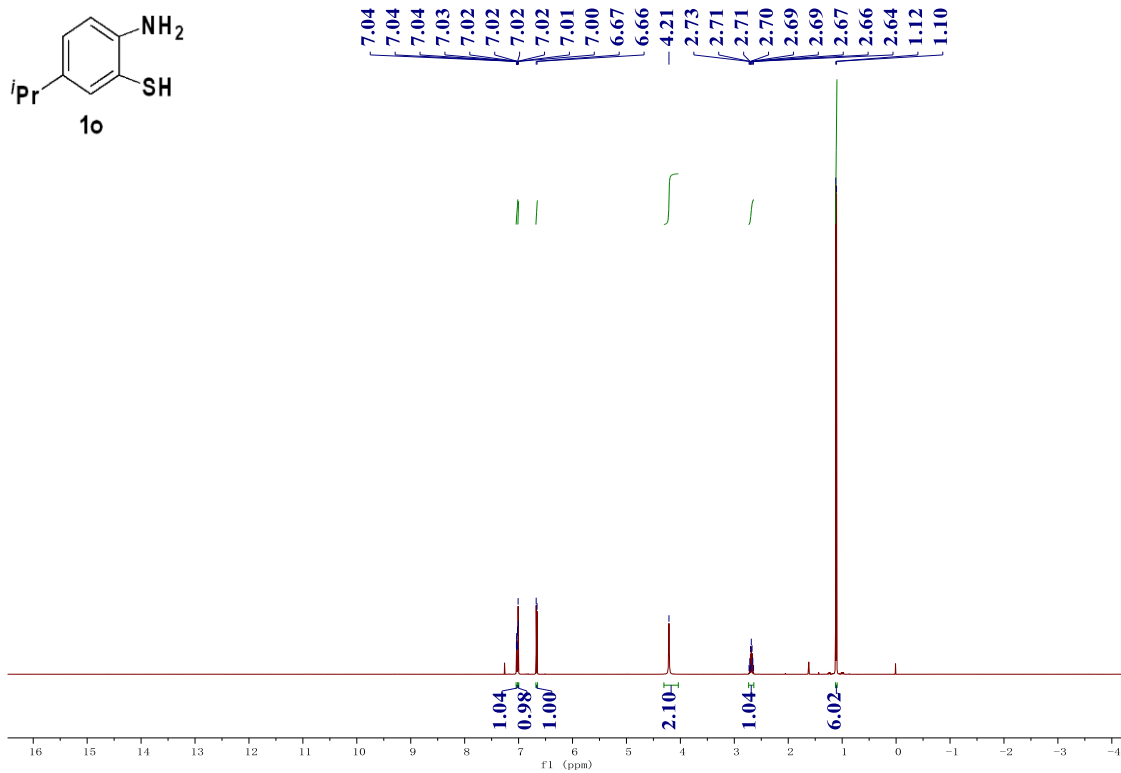

Fig. 27 <sup>1</sup>H NMR of **1o** in CDCl<sub>3</sub>

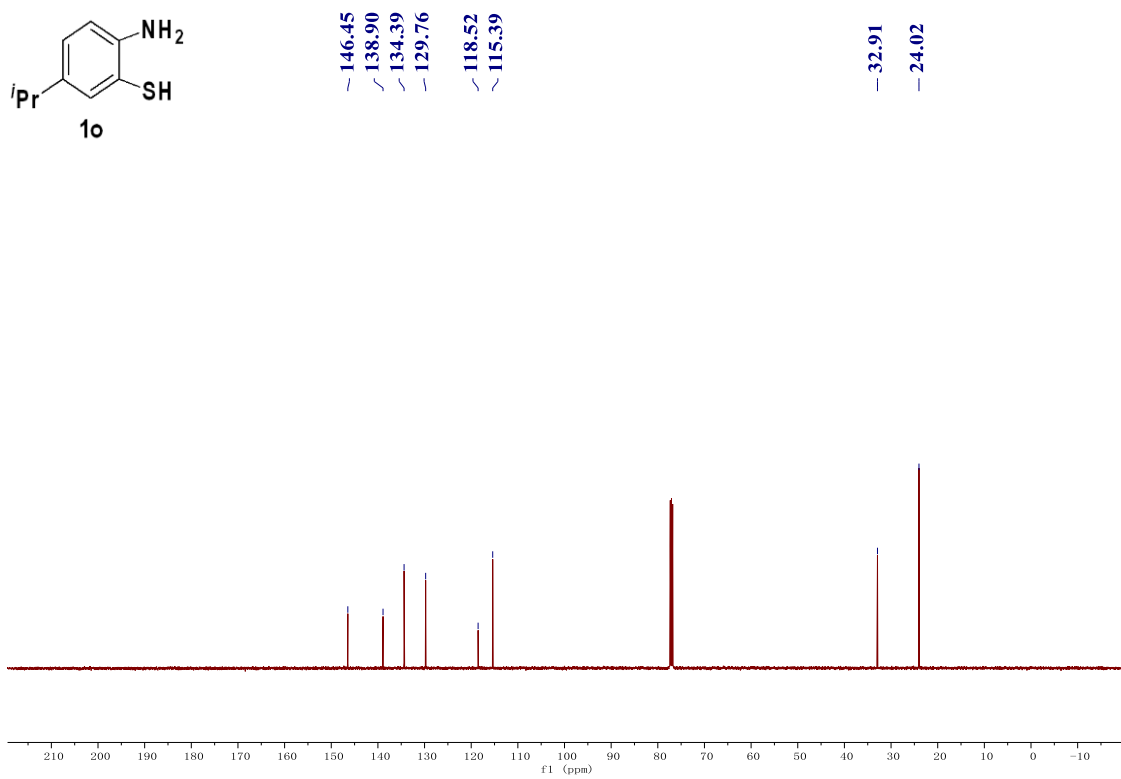

Fig. 28 <sup>13</sup>C NMR of **1o** in CDCl<sub>3</sub>

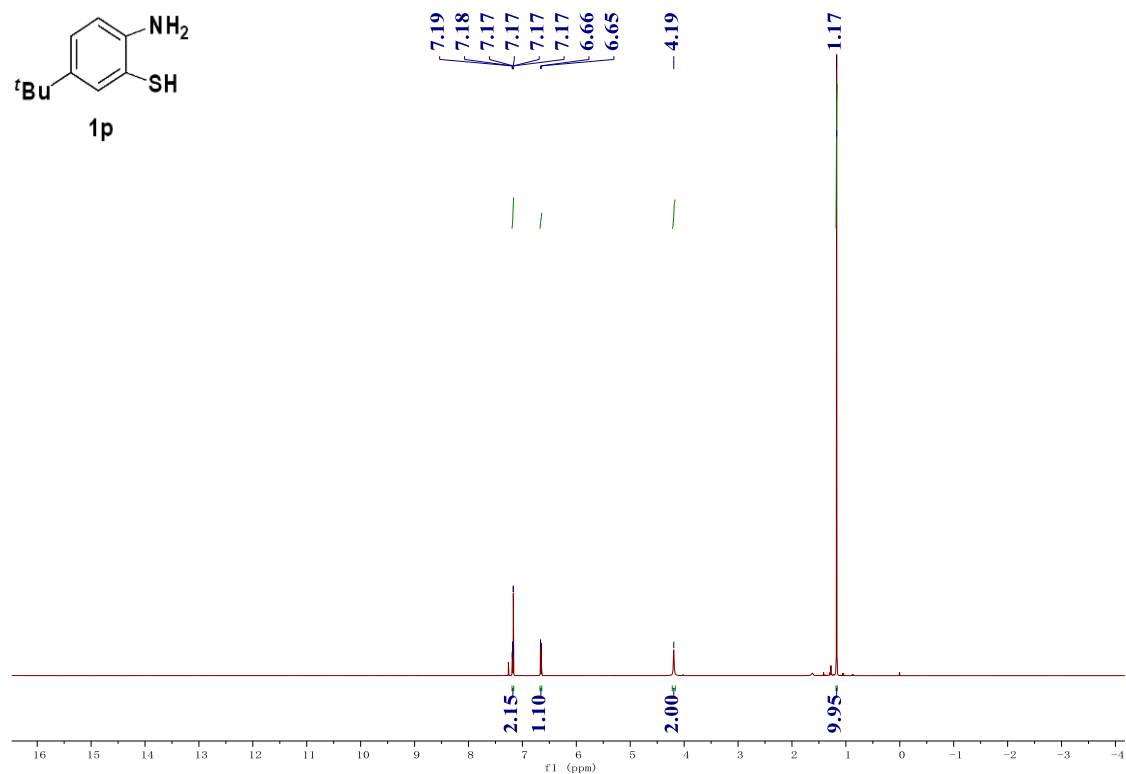

**Fig. 29**  $^1\text{H NMR}$  of **1p** in  $\text{CDCl}_3$

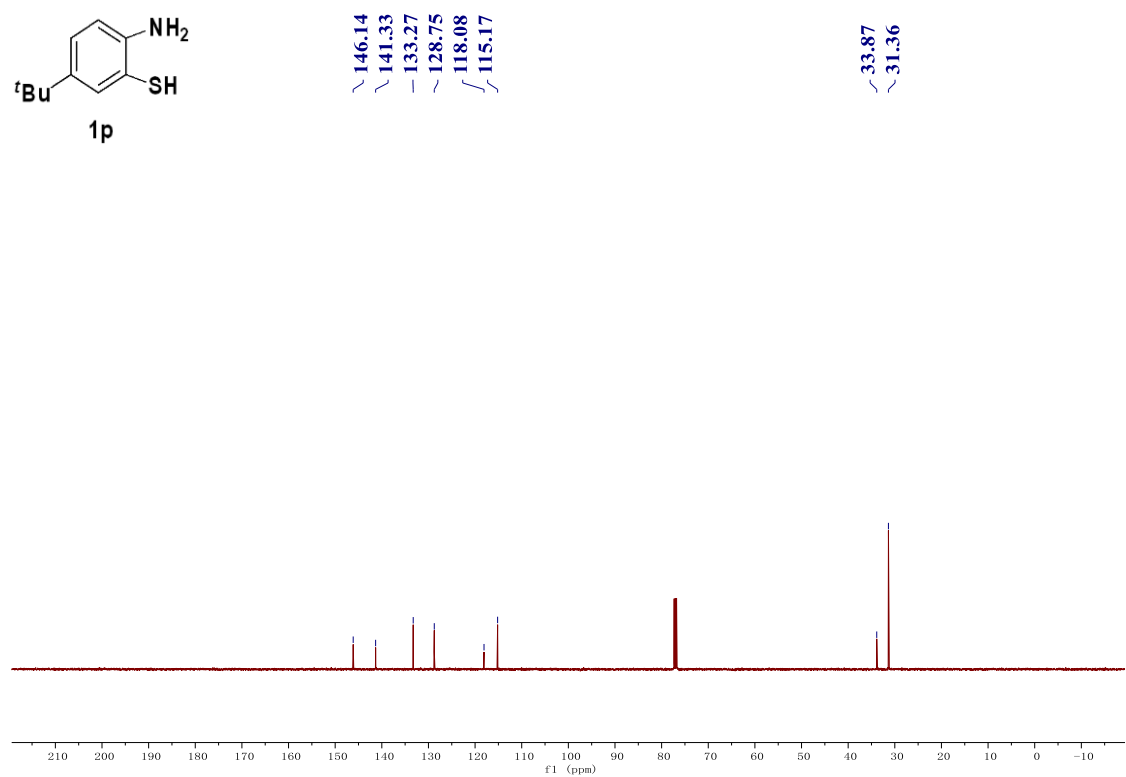

**Fig. 30**  $^{13}\text{C NMR}$  of **1p** in  $\text{CDCl}_3$

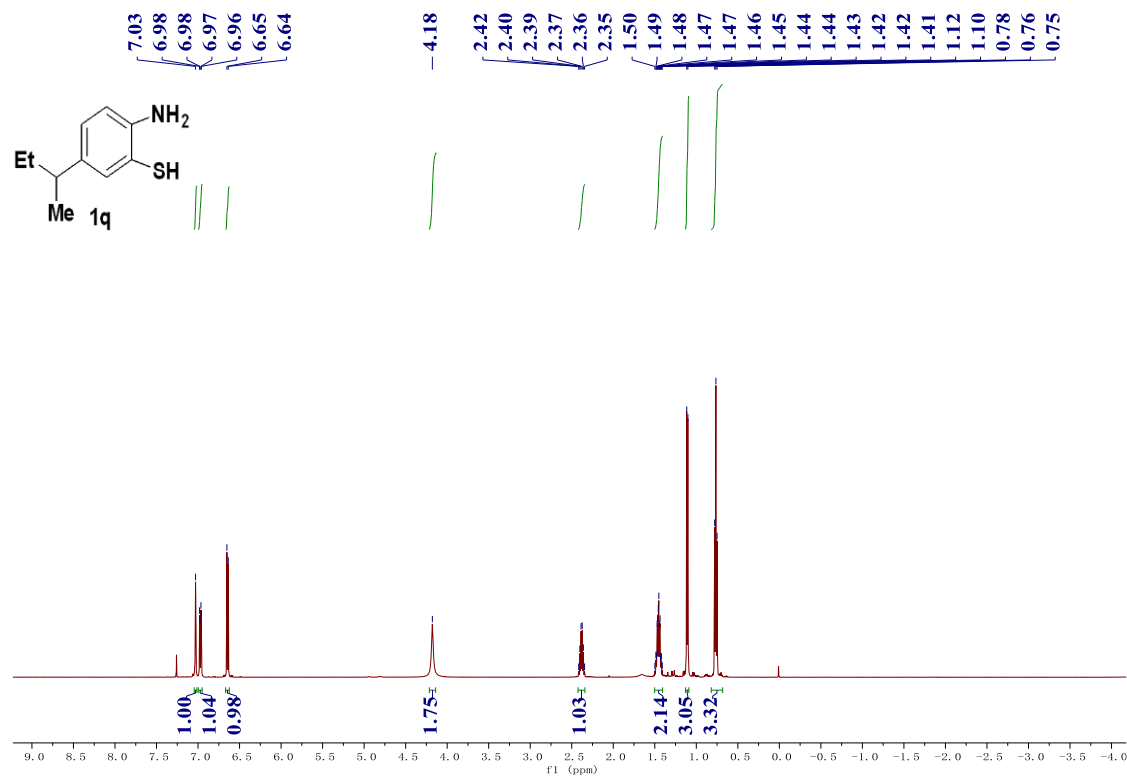

**Fig. 31** <sup>1</sup>H NMR of **1q** in CDCl<sub>3</sub>

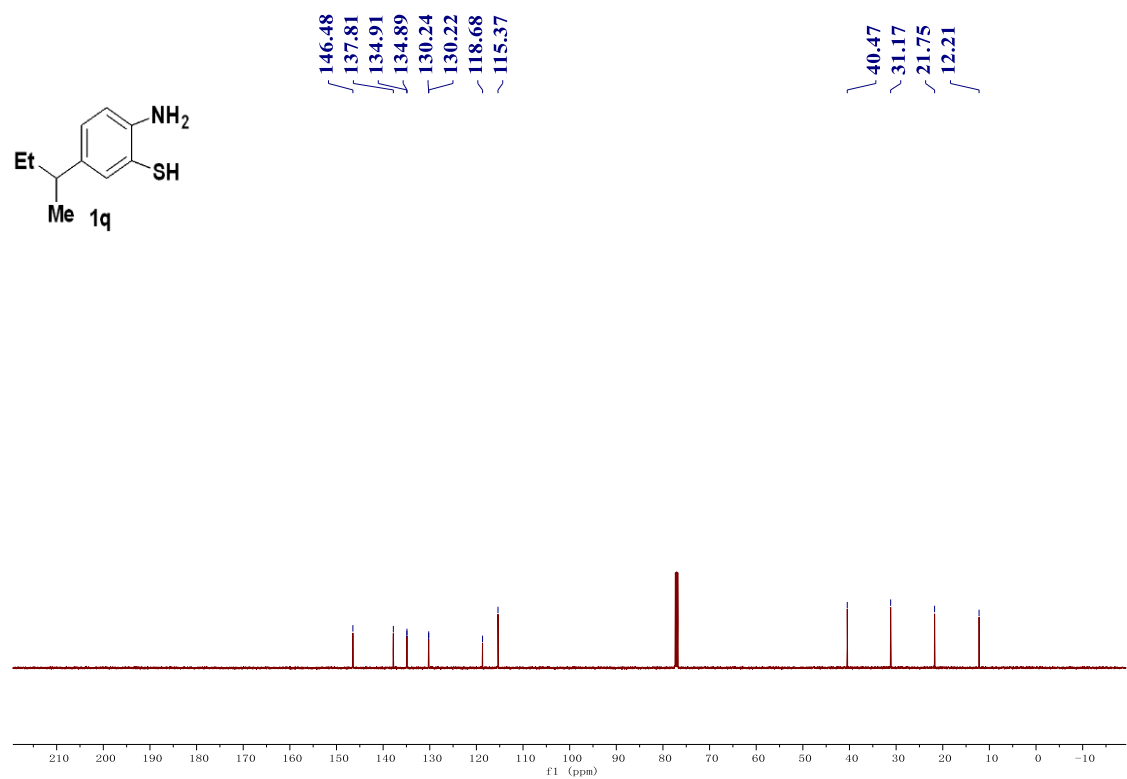

**Fig. 32** <sup>13</sup>C NMR of **1q** in CDCl<sub>3</sub>

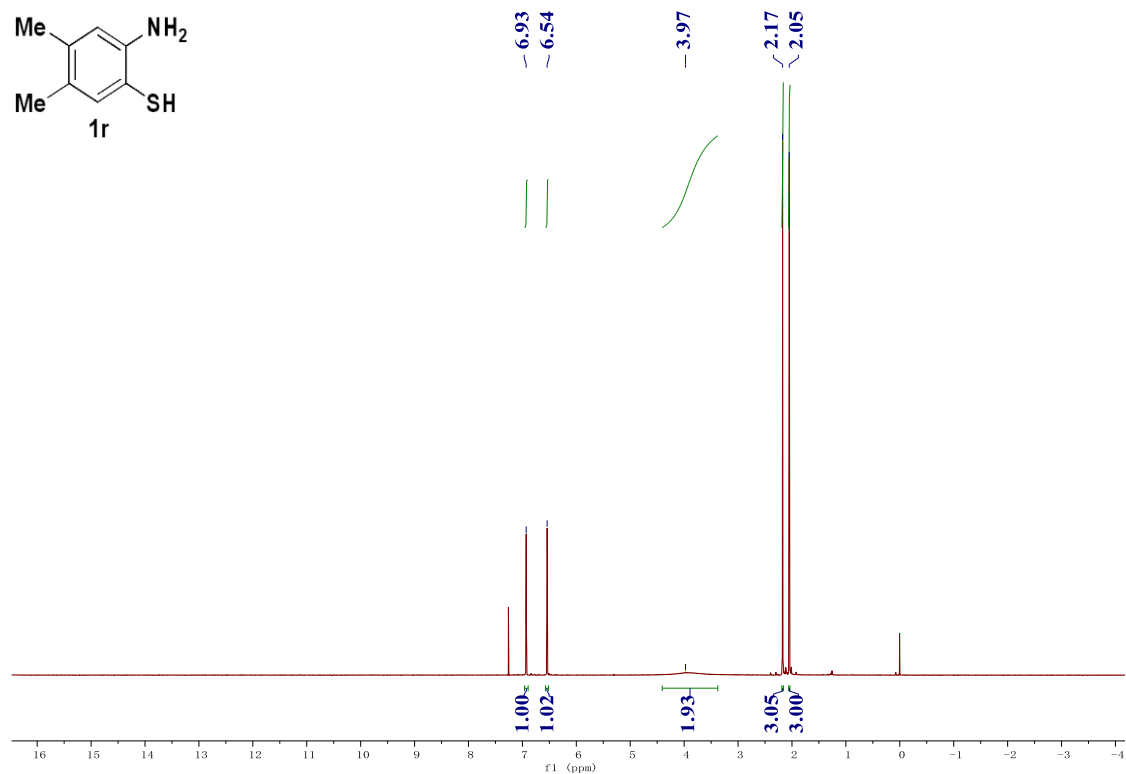

**Fig. 33**  $^1\text{H}$  NMR of **1r** in  $\text{CDCl}_3$

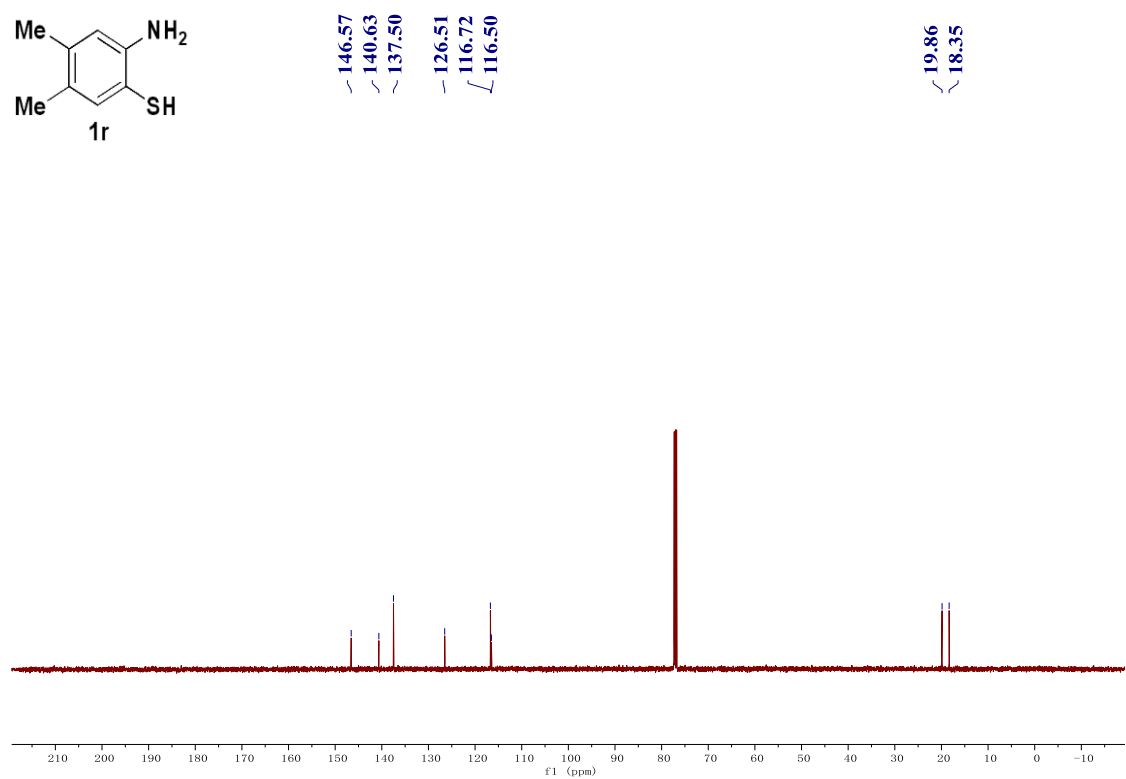

**Fig. 34**  $^{13}\text{C}$  NMR of **1r** in  $\text{CDCl}_3$



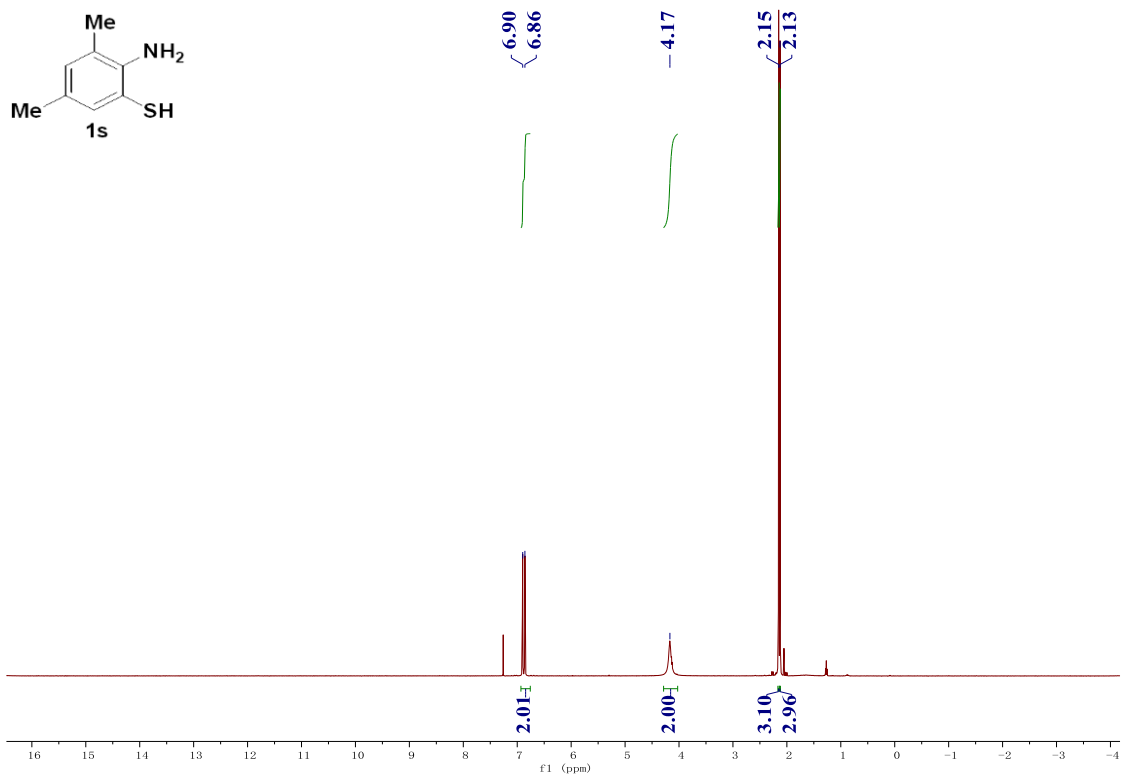

Fig. 35  $^1\text{H}$  NMR of 1s in  $\text{CDCl}_3$

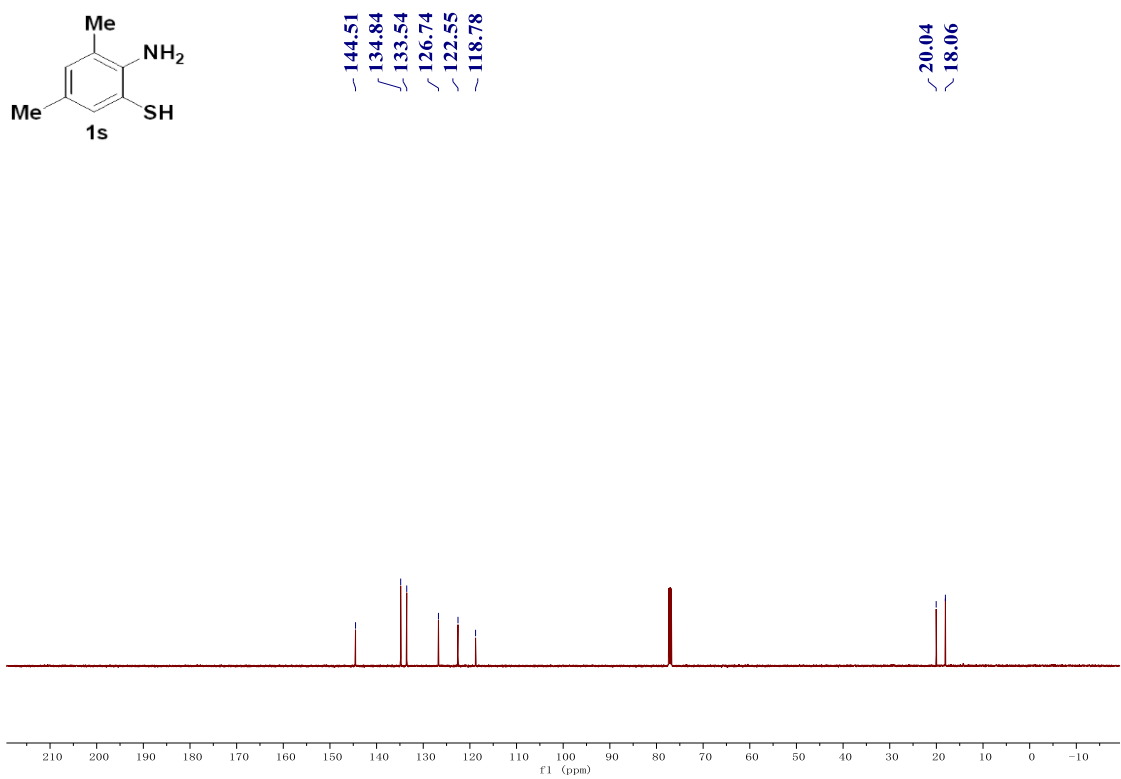

Fig. 36  $^{13}\text{C}$  NMR of 1s in  $\text{CDCl}_3$

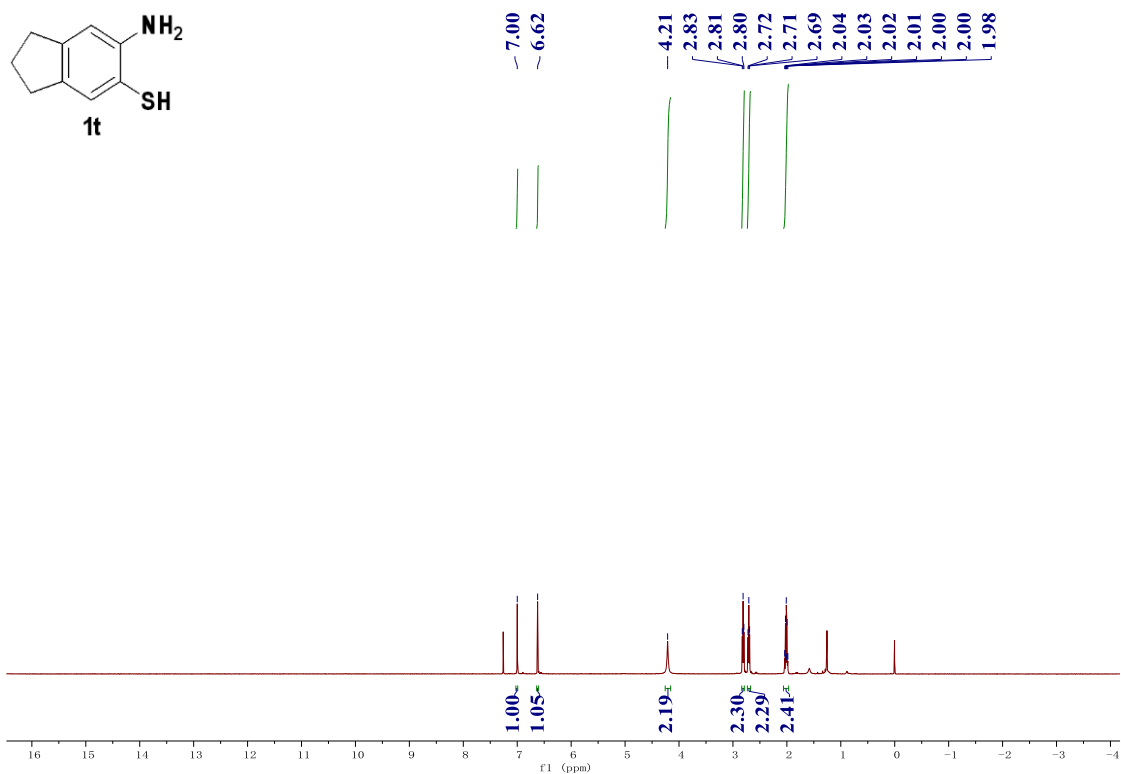

**Fig. 37**  $^1\text{H}$  NMR of **1t** in  $\text{CDCl}_3$

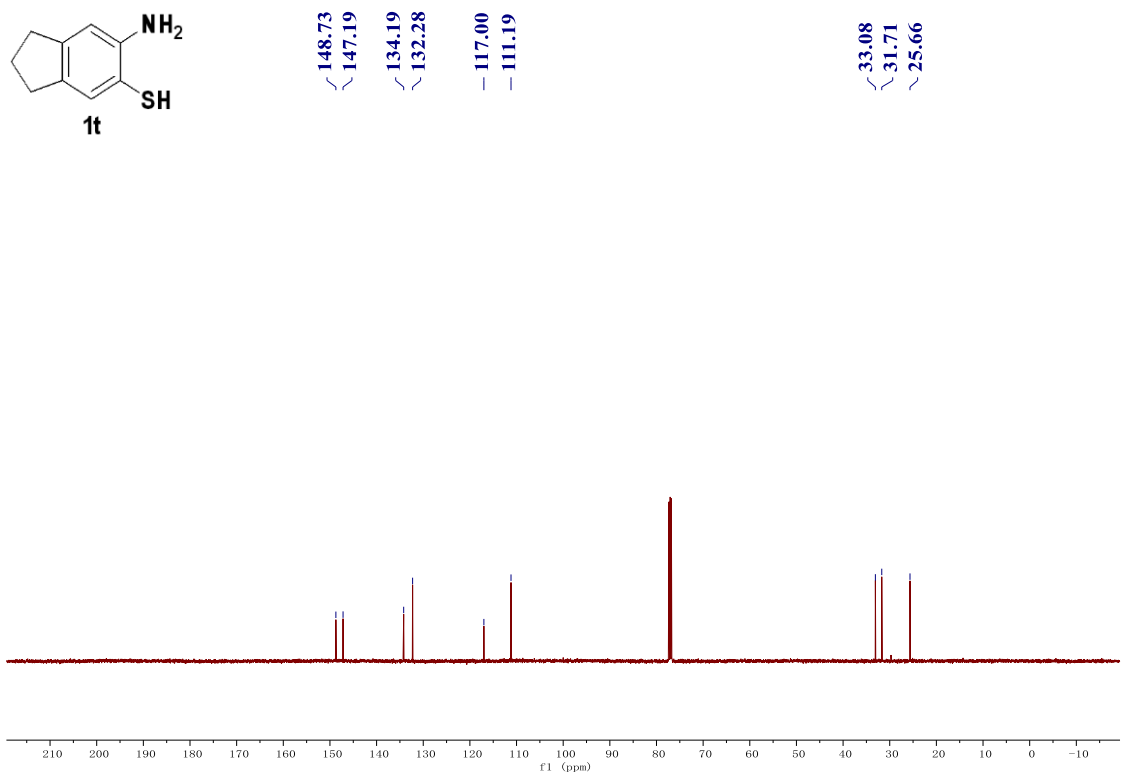

**Fig. 38**  $^{13}\text{C}$  NMR of **1t** in  $\text{CDCl}_3$

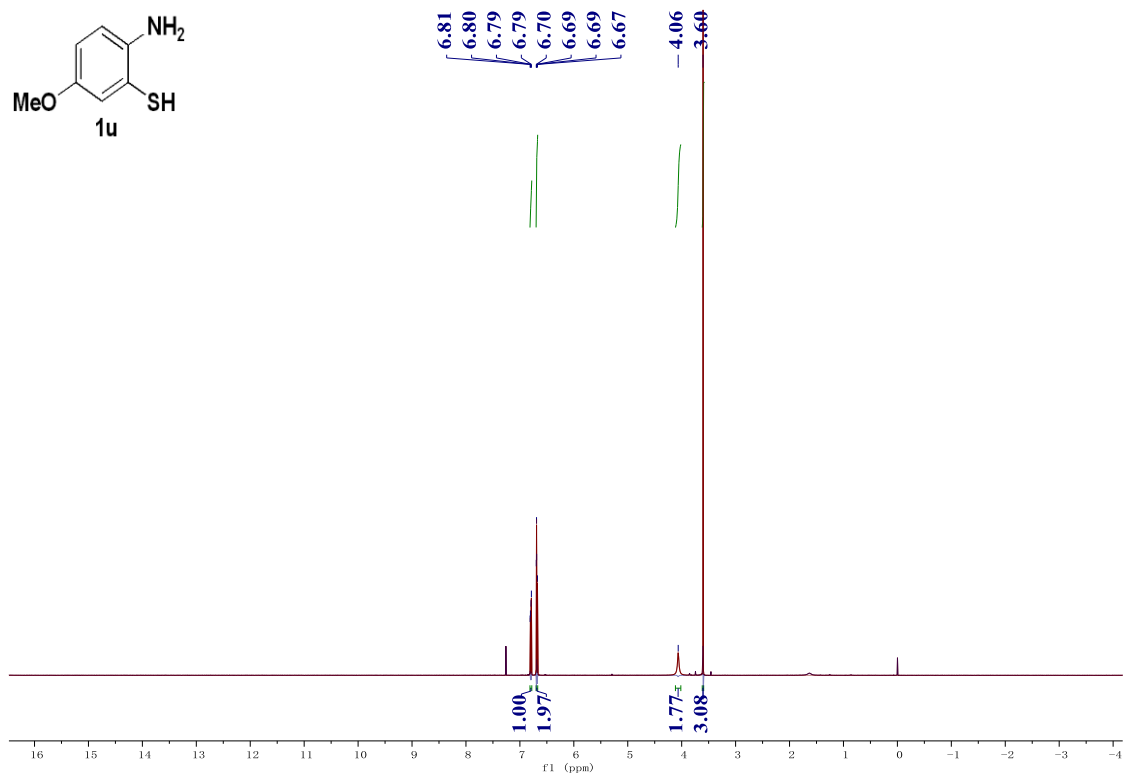

**Fig. 39**  $^1\text{H NMR}$  of **1u** in  $\text{CDCl}_3$

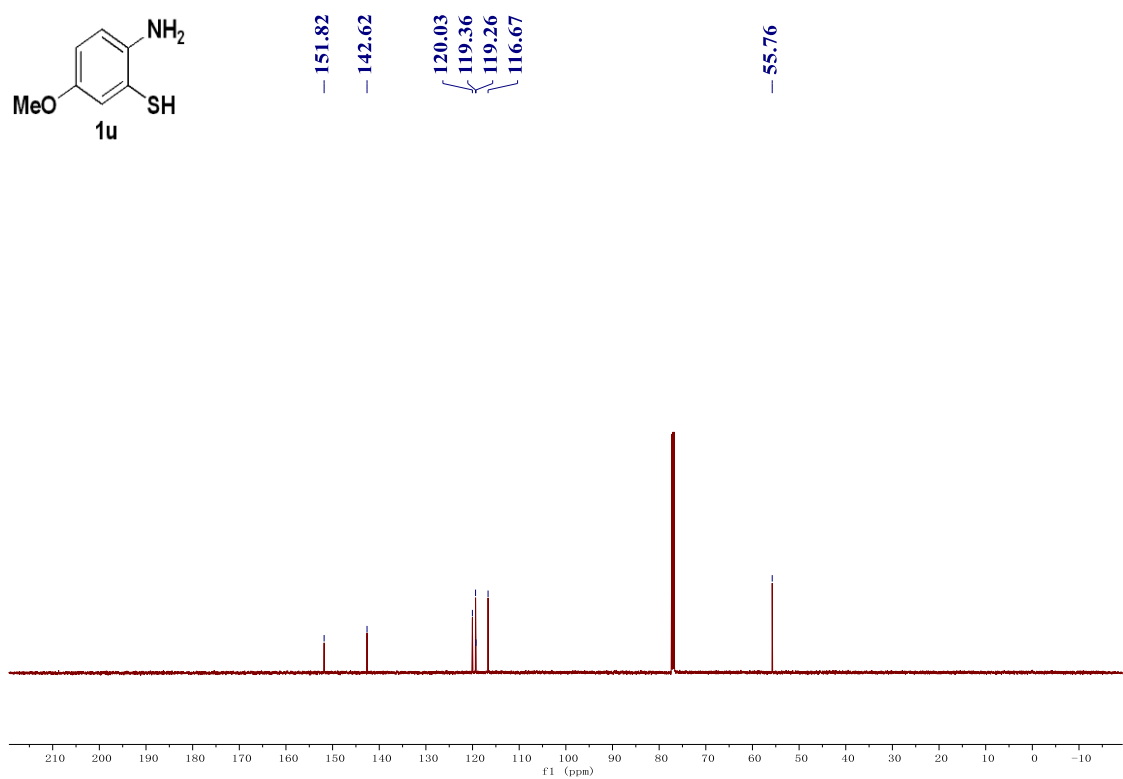

**Fig. 40**  $^{13}\text{C NMR}$  of **1u** in  $\text{CDCl}_3$

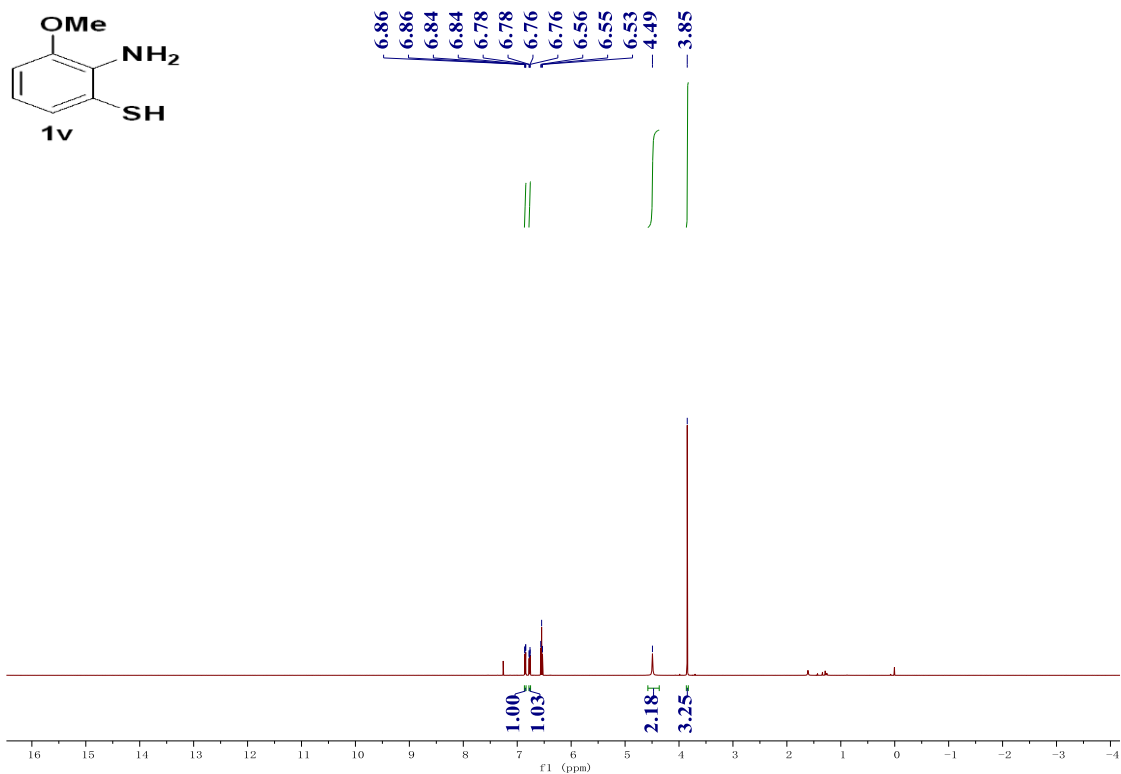

**Fig. 41**  $^1\text{H NMR}$  of **1v** in  $\text{CDCl}_3$

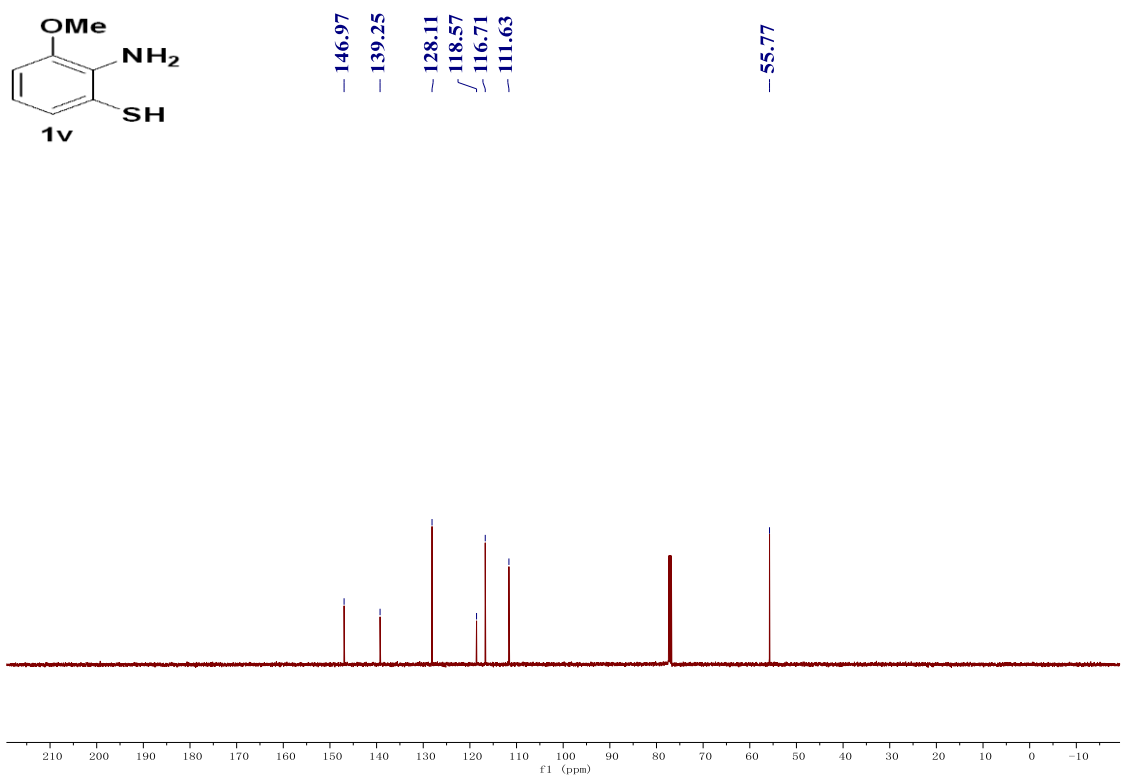

**Fig. 42**  $^{13}\text{C NMR}$  of **1v** in  $\text{CDCl}_3$

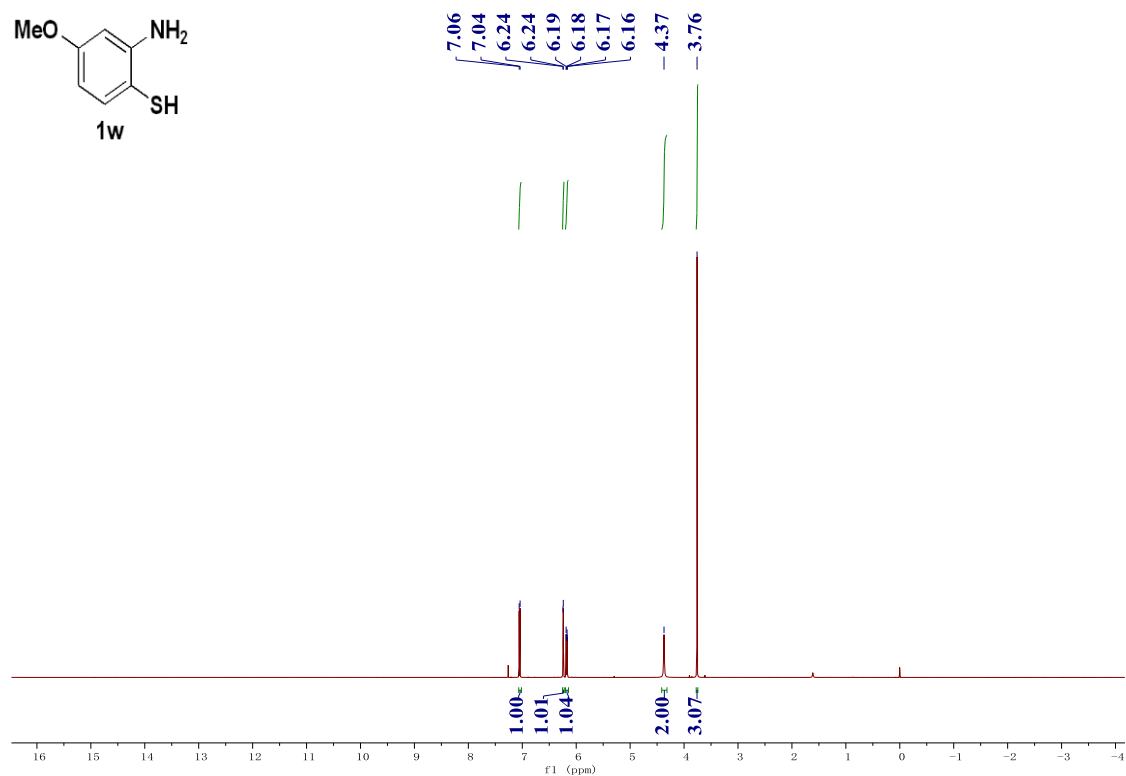

**Fig. 43**  $^1\text{H NMR}$  of **1w** in  $\text{CDCl}_3$

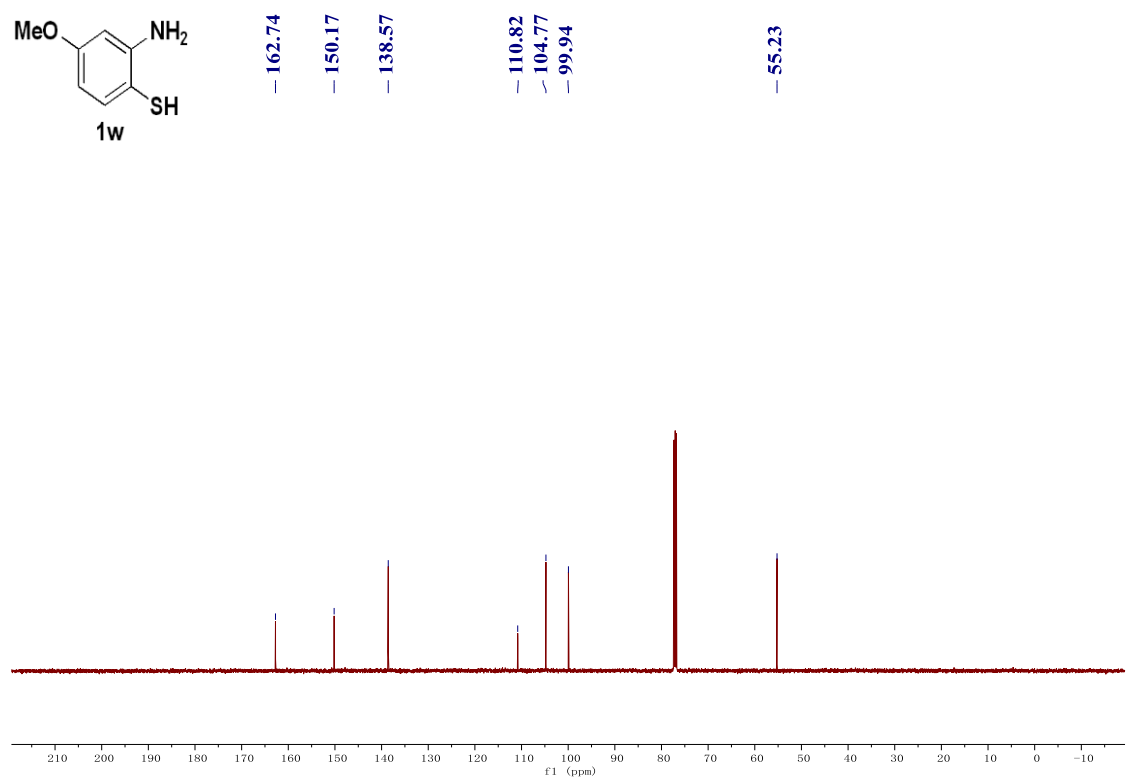

**Fig. 44**  $^{13}\text{C NMR}$  of **1w** in  $\text{CDCl}_3$

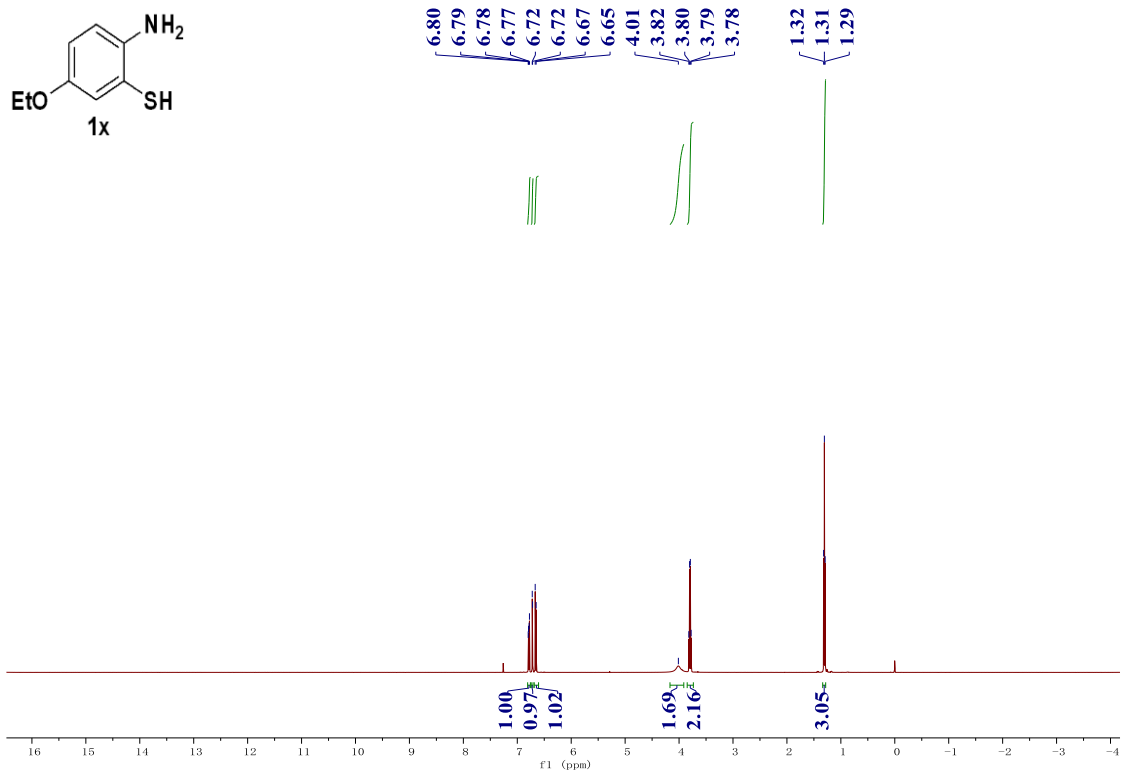

Fig. 45  $^1\text{H NMR}$  of 1x in  $\text{CDCl}_3$

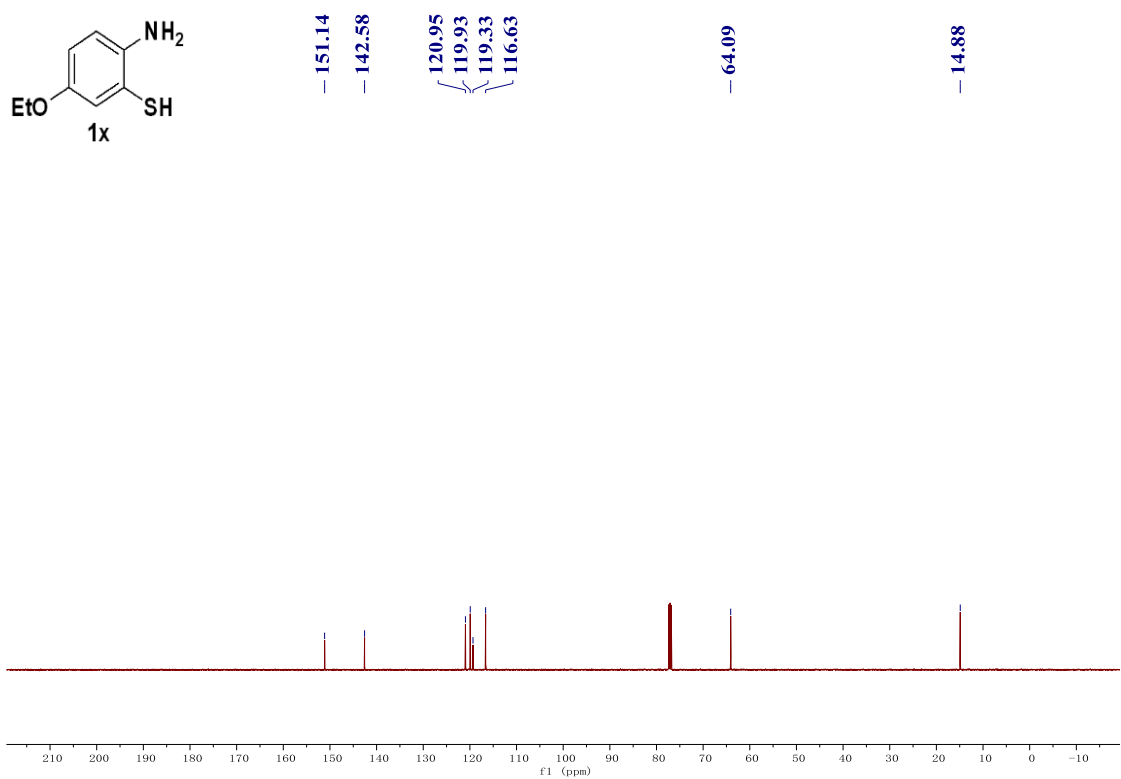

Fig. 46  $^{13}\text{C NMR}$  of 1x in  $\text{CDCl}_3$

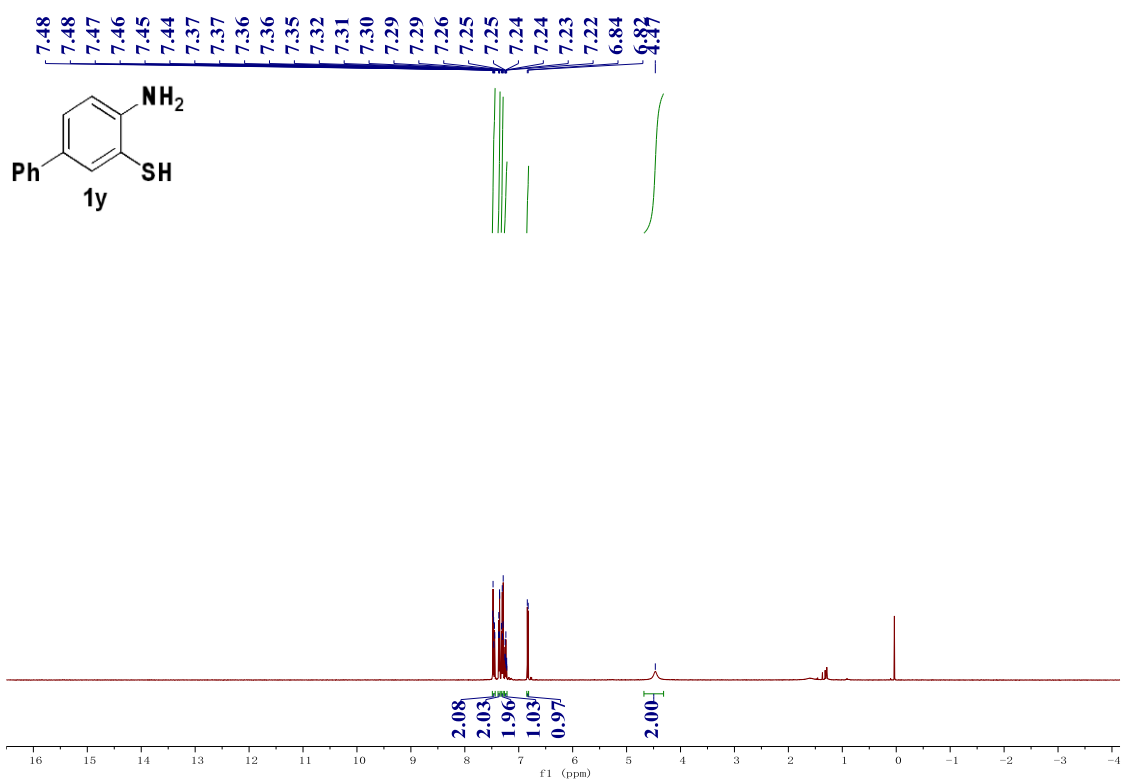

**Fig. 47** <sup>1</sup>H NMR of **1y** in CDCl<sub>3</sub>

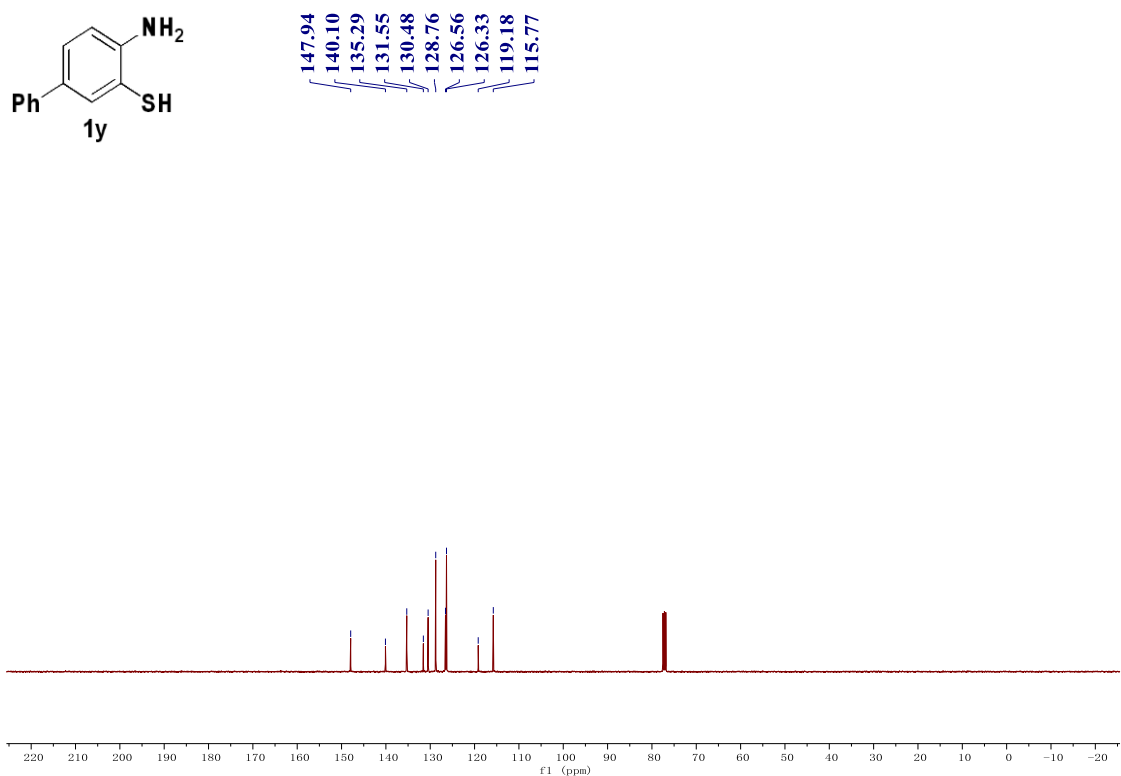

**Fig. 48** <sup>13</sup>C NMR of **1y** in CDCl<sub>3</sub>

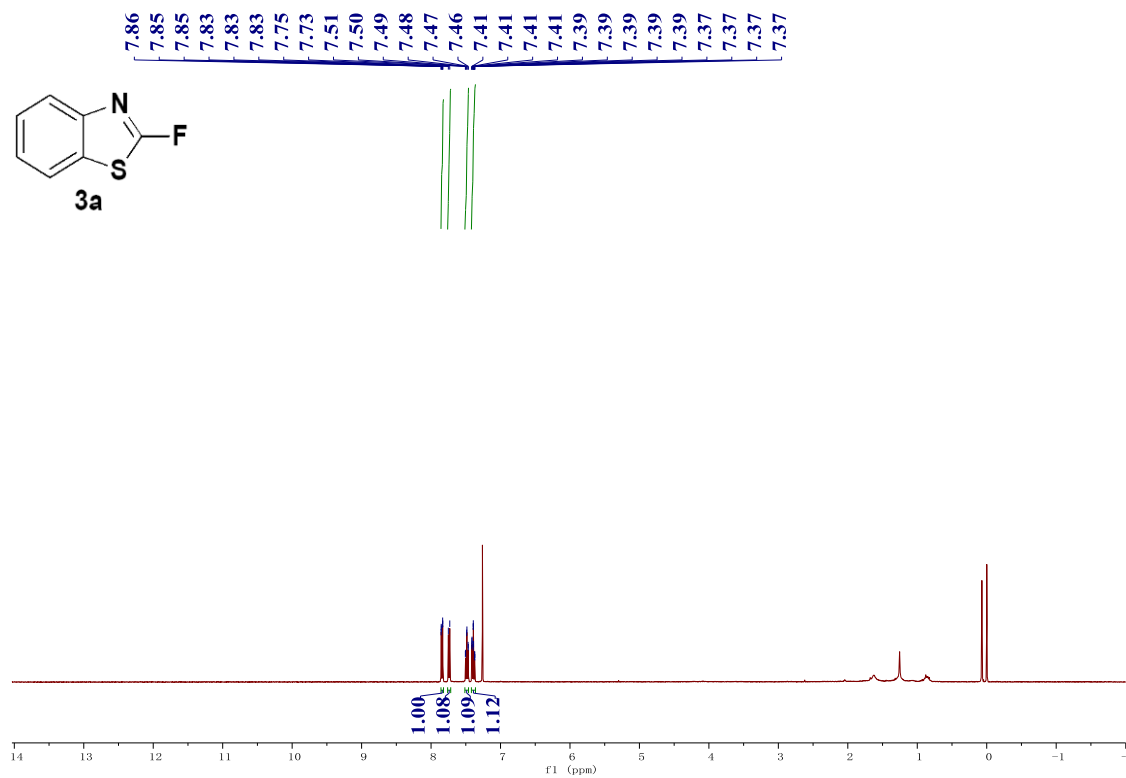

Fig. 49 <sup>1</sup>H NMR of 3a in CDCl<sub>3</sub>

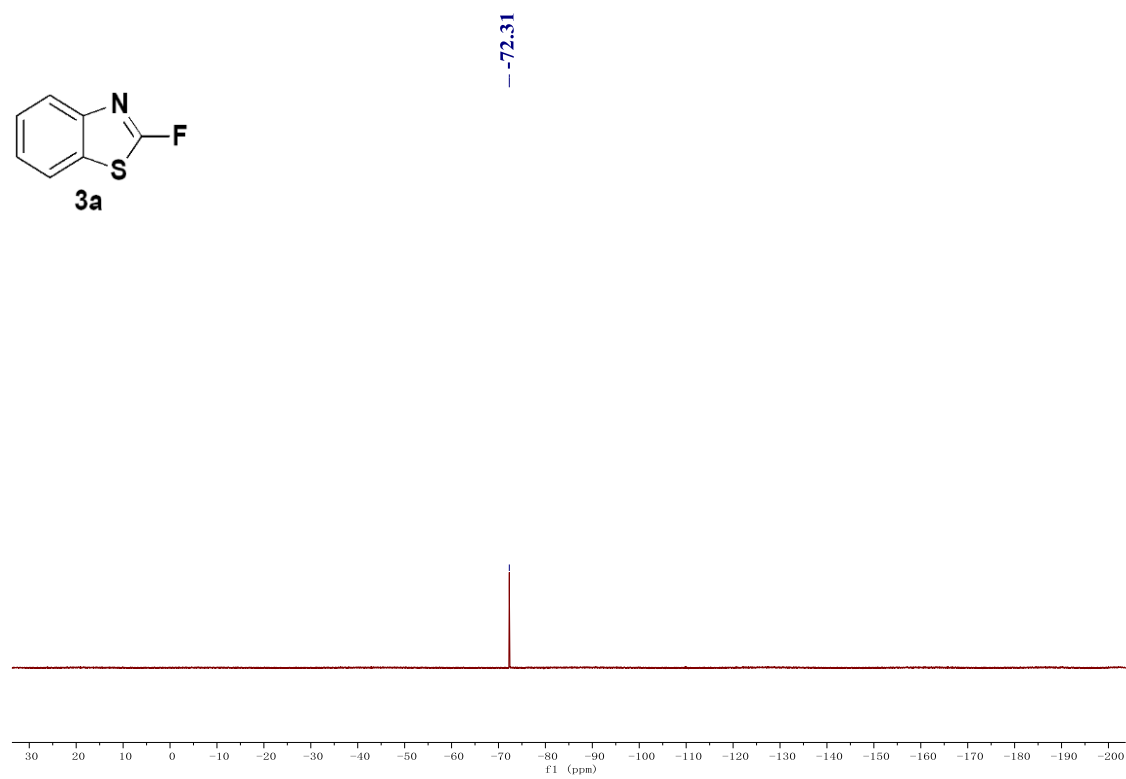

Fig. 50 <sup>19</sup>F NMR of 3a in CDCl<sub>3</sub>



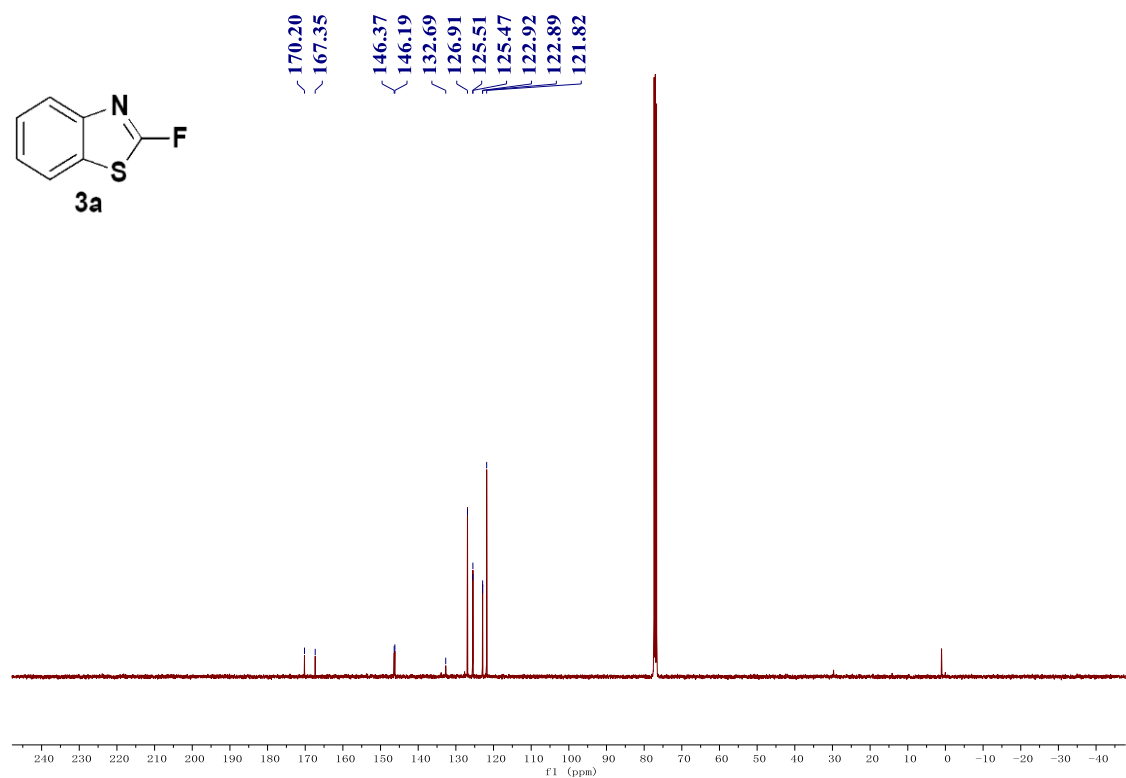

Fig. 51  $^{13}\text{C}$  NMR of **3a** in  $\text{CDCl}_3$

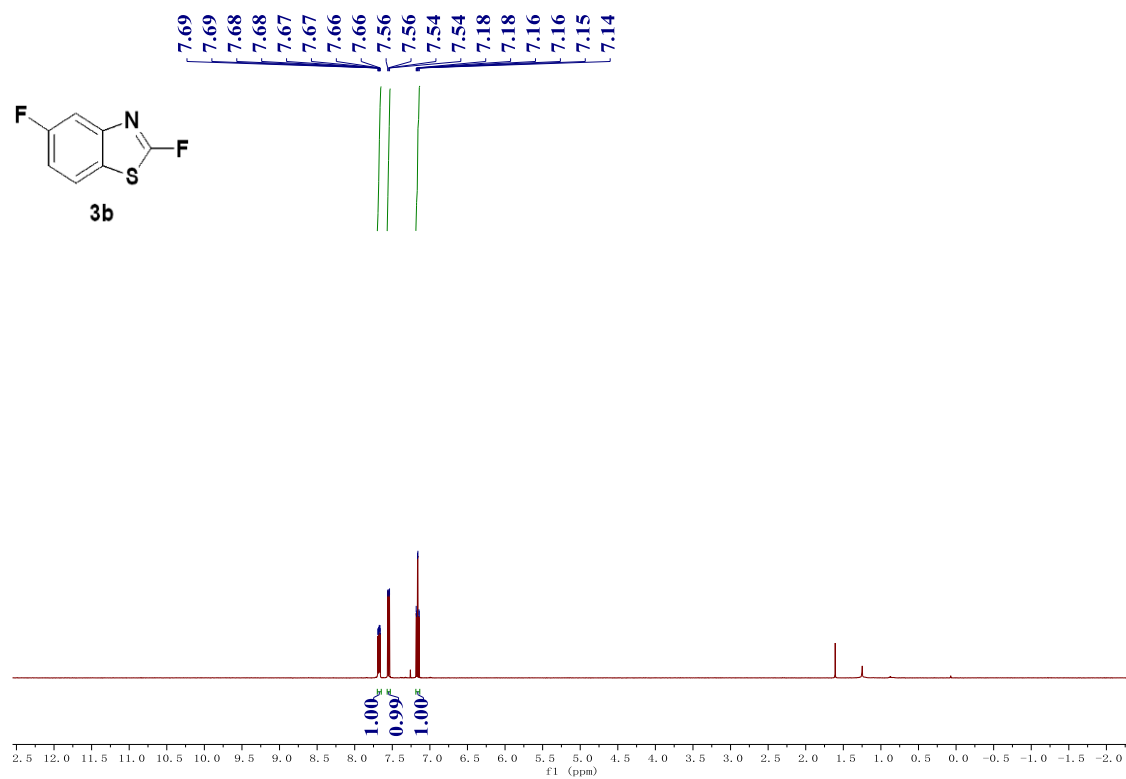

Fig. 52  $^1\text{H}$  NMR of **3b** in  $\text{CDCl}_3$

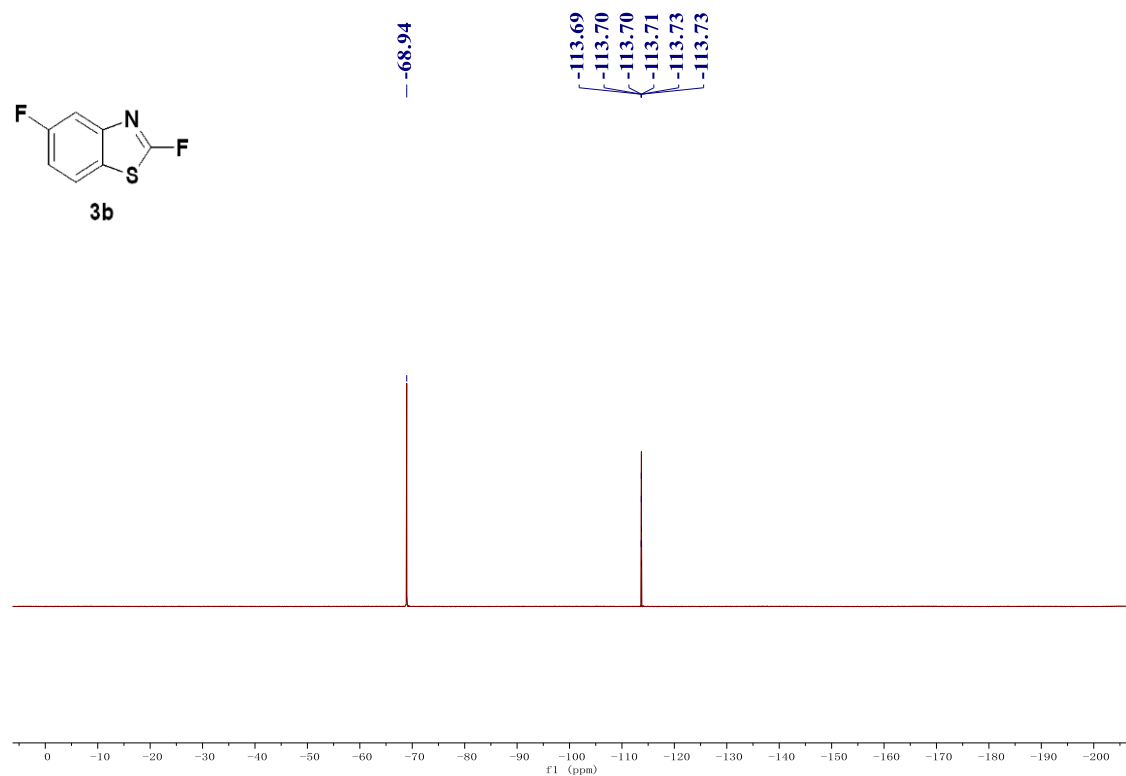

**Fig. 53**  $^{19}\text{F}$  NMR of **3b** in  $\text{CDCl}_3$

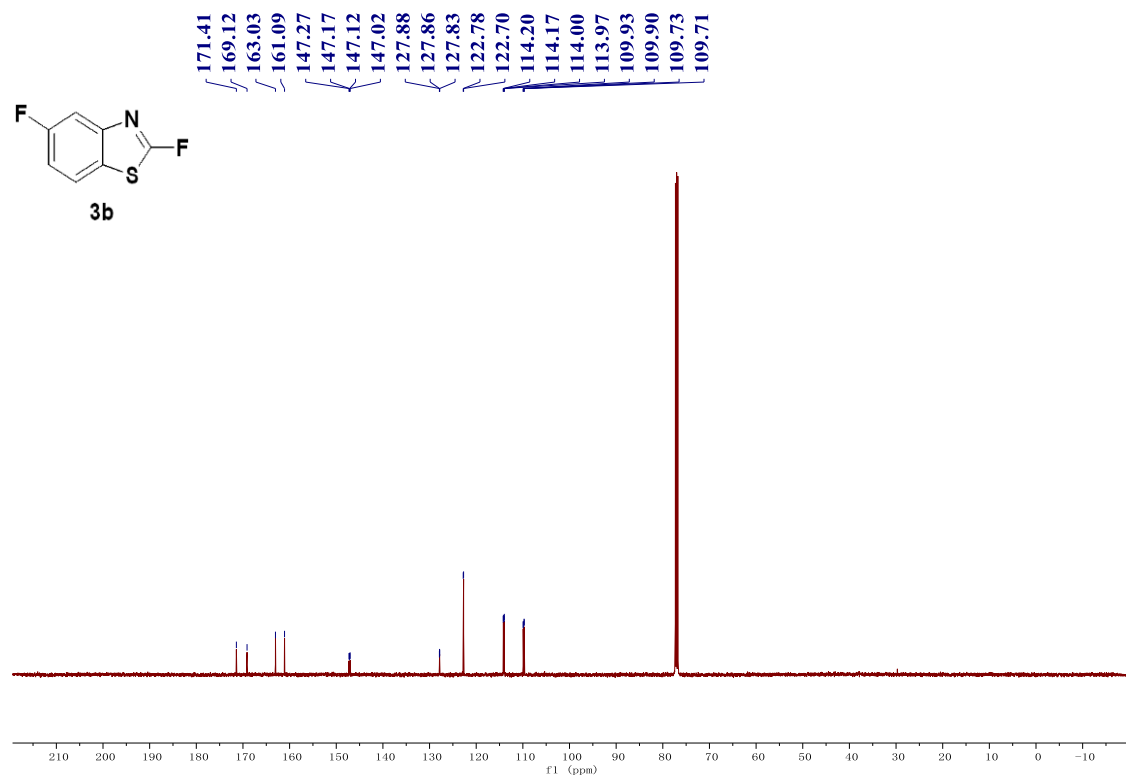

**Fig. 54**  $^{13}\text{C}$  NMR of **3b** in  $\text{CDCl}_3$

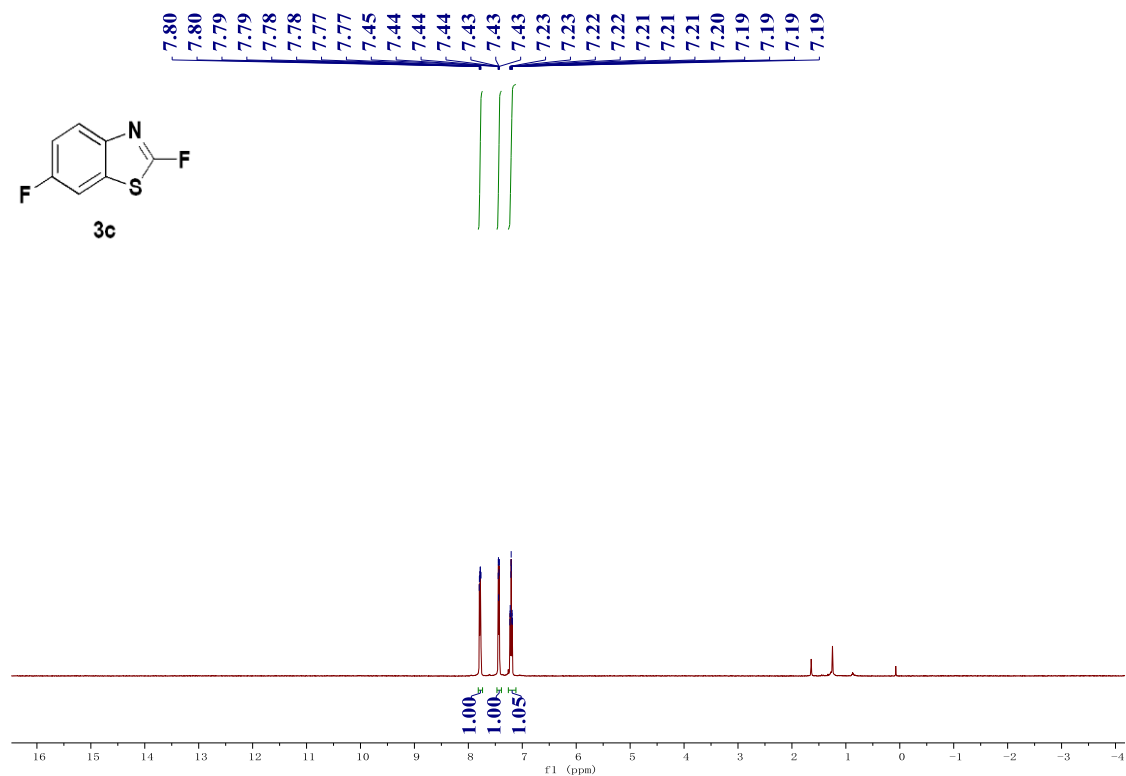

**Fig. 55** <sup>1</sup>H NMR of **3c** in CDCl<sub>3</sub>

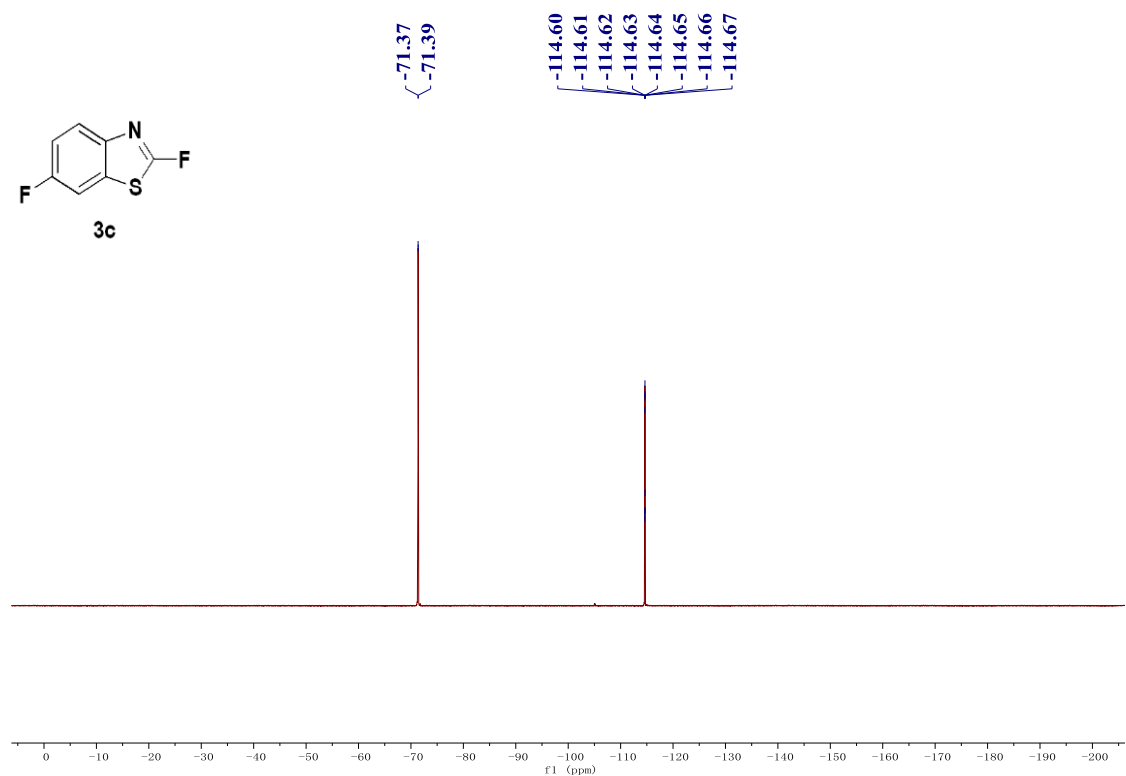

**Fig. 56** <sup>19</sup>F NMR of **3c** in CDCl<sub>3</sub>

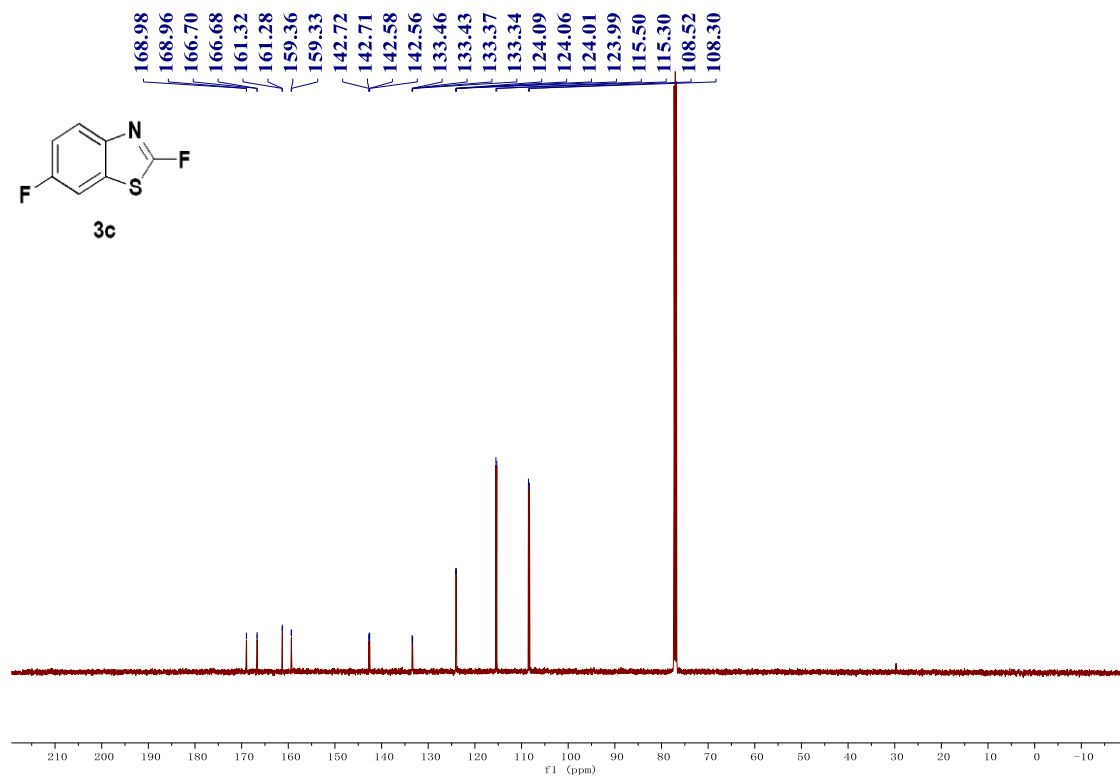

**Fig. 57**  $^{13}\text{C}$  NMR of **3c** in  $\text{CDCl}_3$

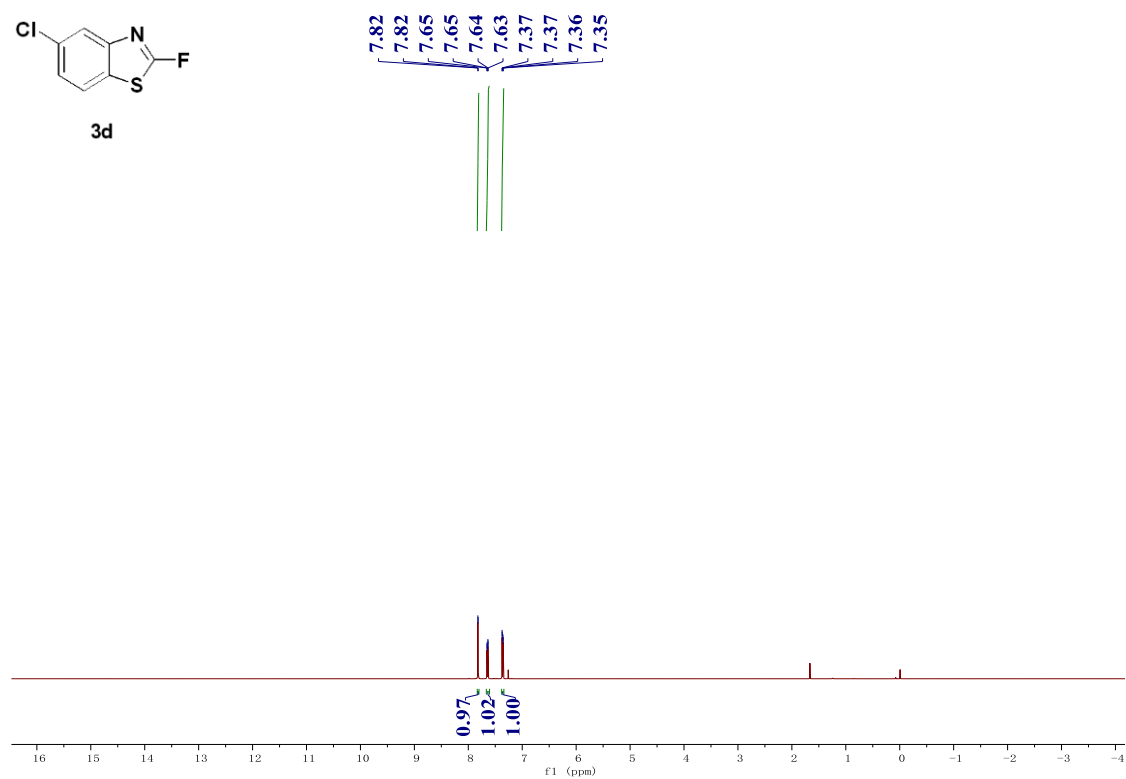

**Fig. 58**  $^1\text{H}$  NMR of **3d** in  $\text{CDCl}_3$

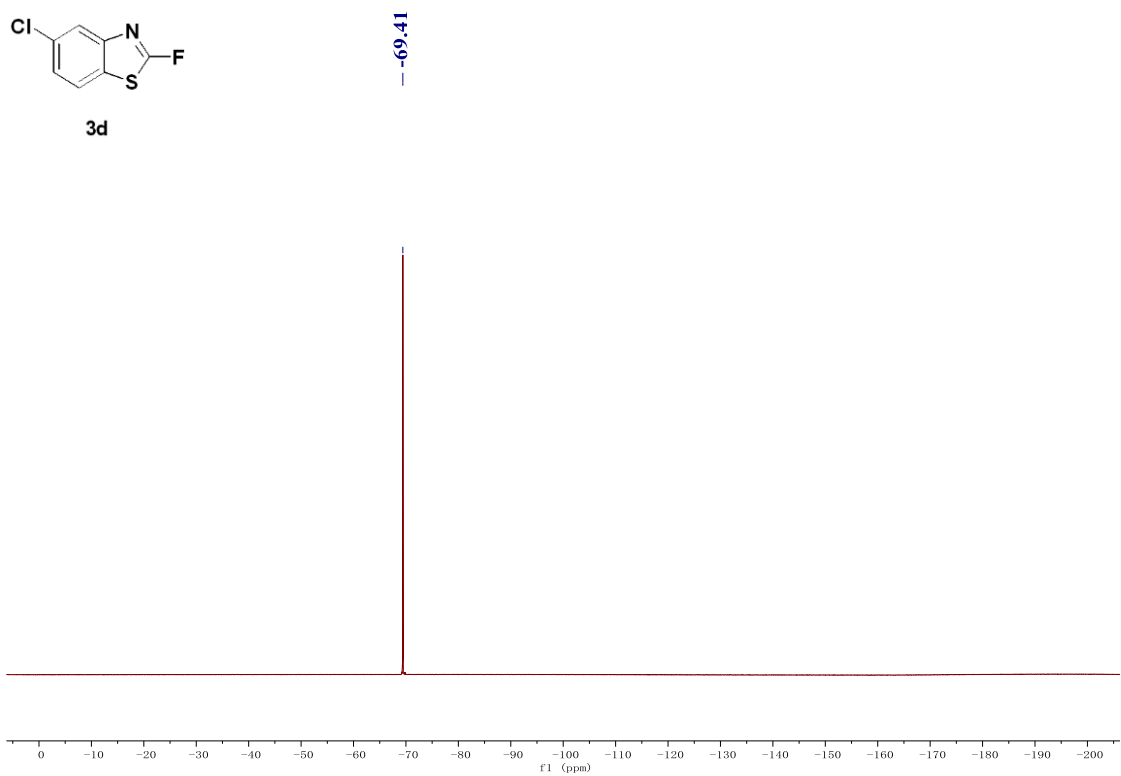

**Fig. 59**  $^{19}\text{F}$  NMR of **3d** in  $\text{CDCl}_3$

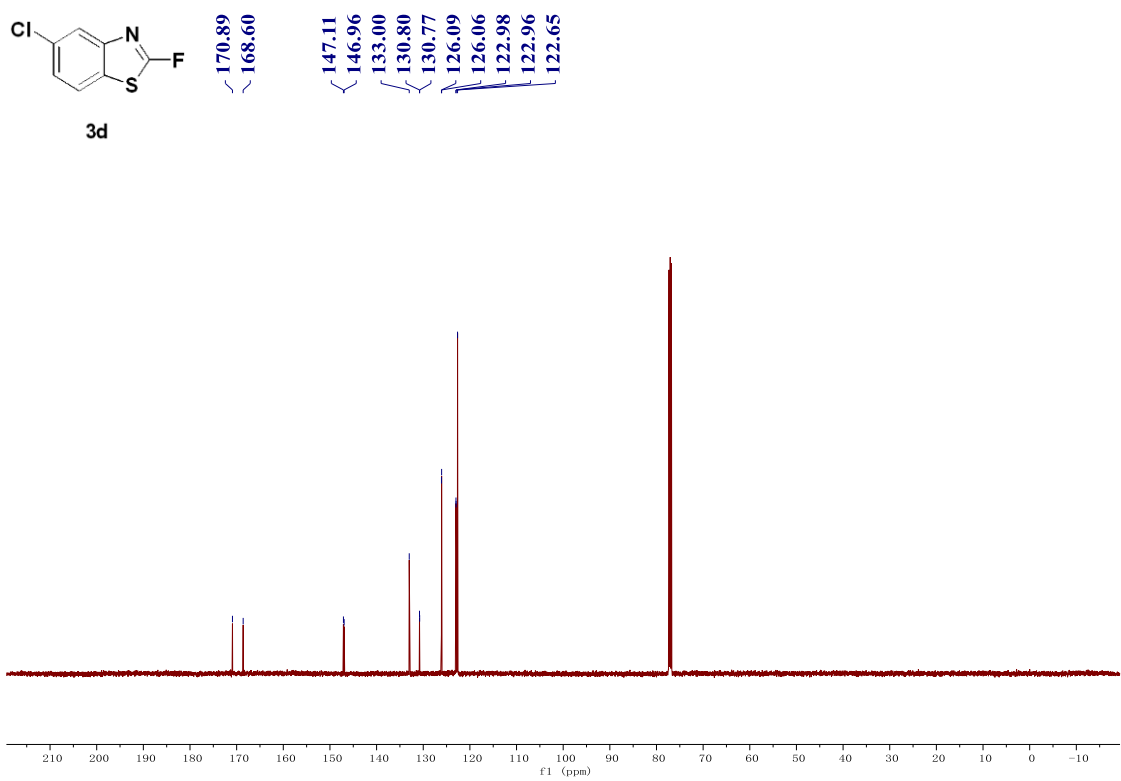

**Fig. 60**  $^{13}\text{C}$  NMR of **3d** in  $\text{CDCl}_3$

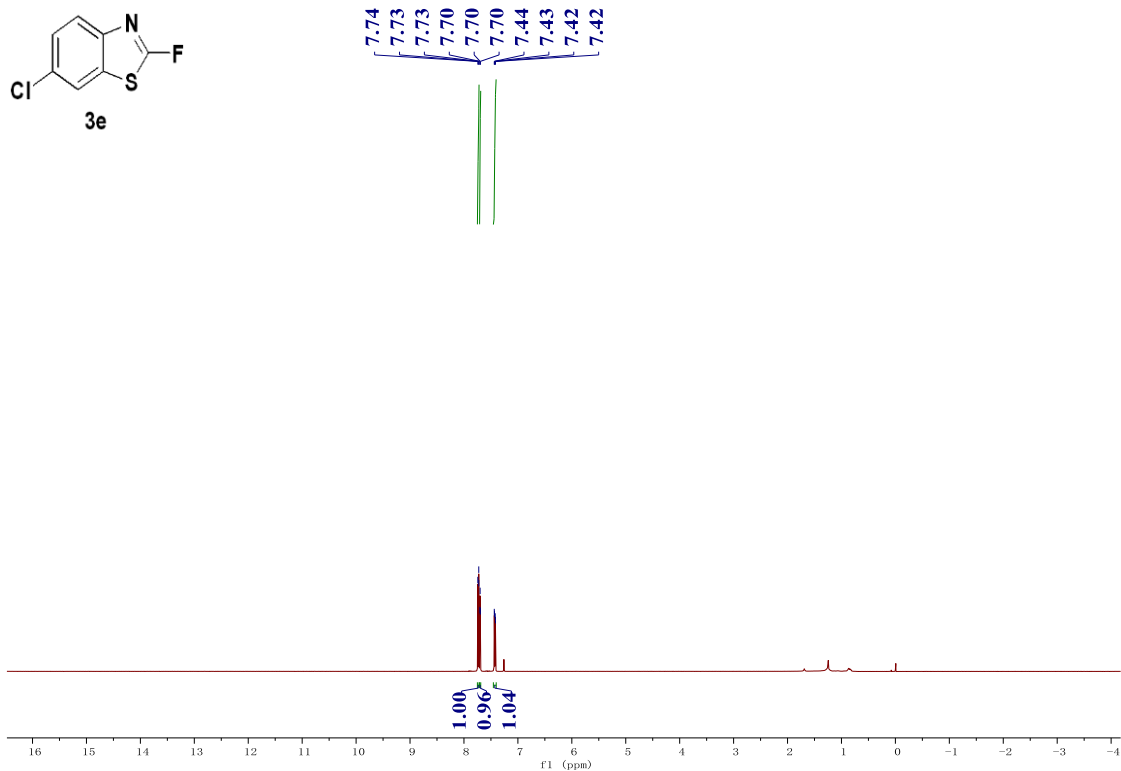

**Fig. 61**  $^1\text{H NMR}$  of **3e** in  $\text{CDCl}_3$

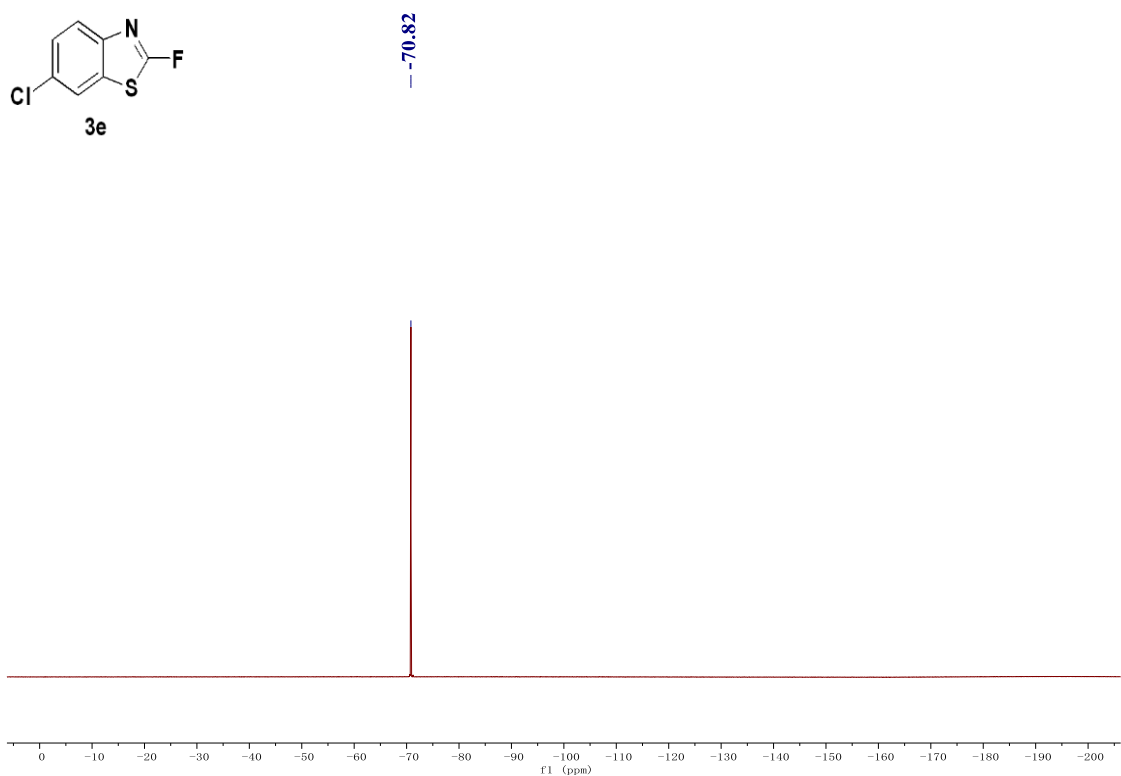

**Fig. 62**  $^{19}\text{F NMR}$  of **3e** in  $\text{CDCl}_3$

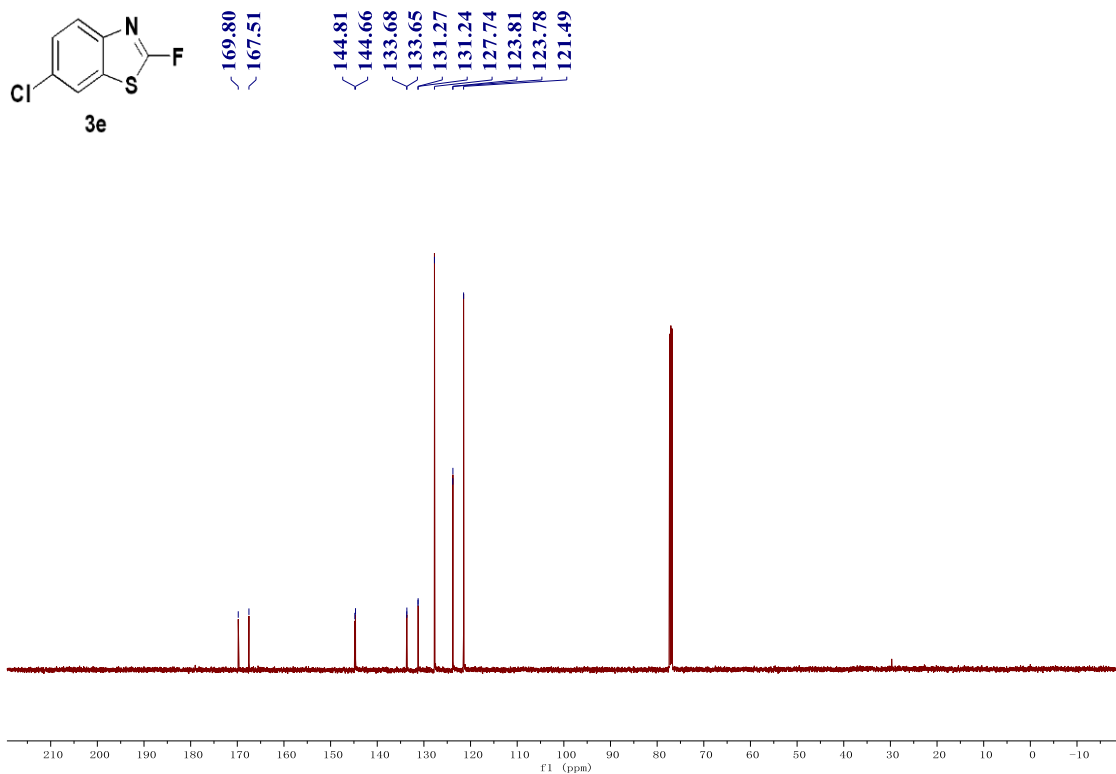

**Fig. 63**  $^{13}\text{C}$  NMR of **3e** in  $\text{CDCl}_3$

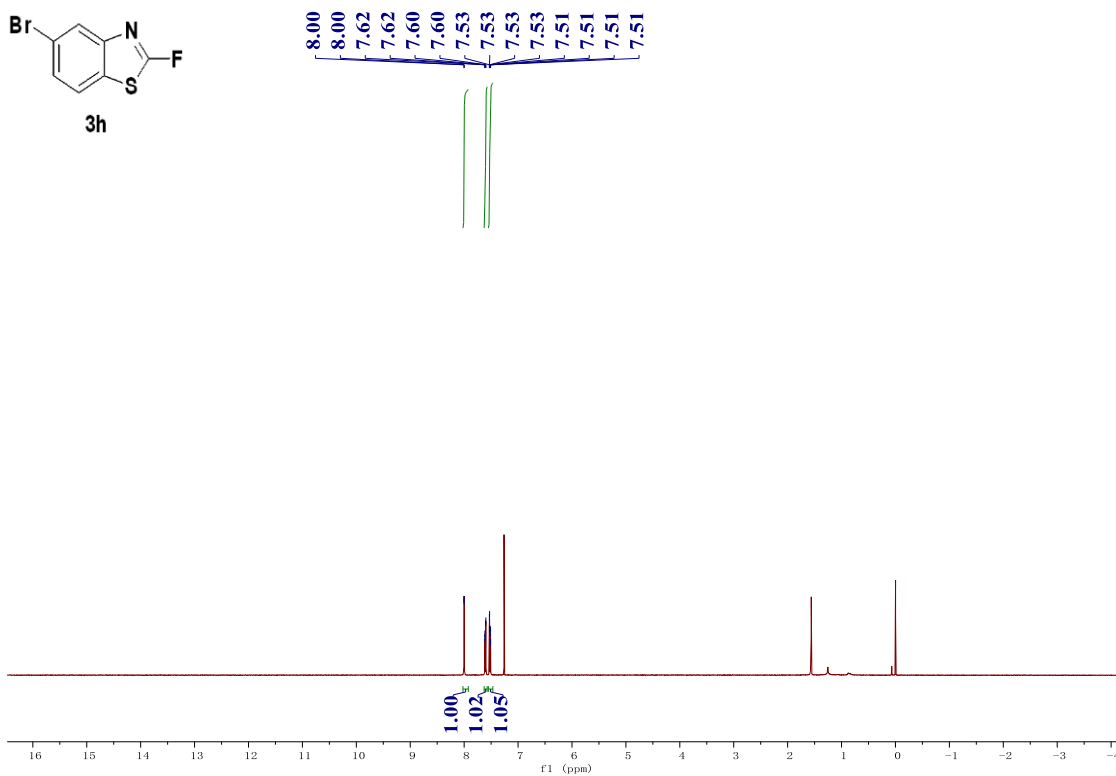

**Fig. 64**  $^1\text{H}$  NMR of **3h** in  $\text{CDCl}_3$

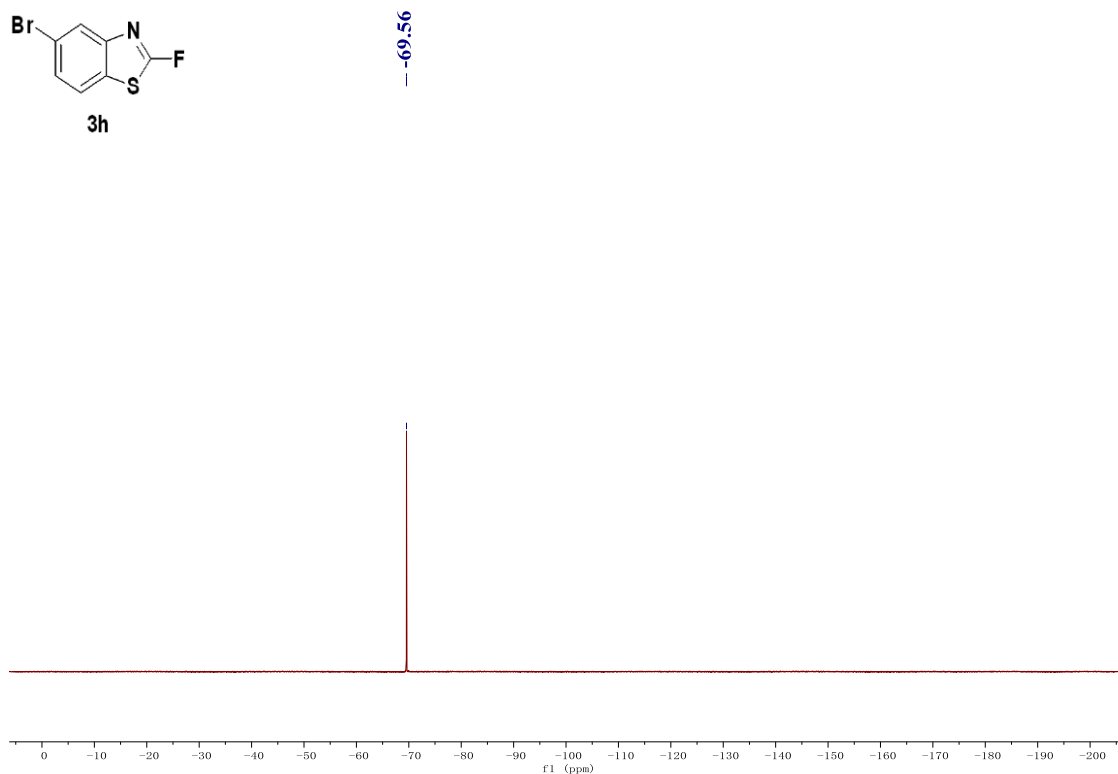

**Fig. 65**  $^{19}\text{F}$  NMR of **3h** in  $\text{CDCl}_3$

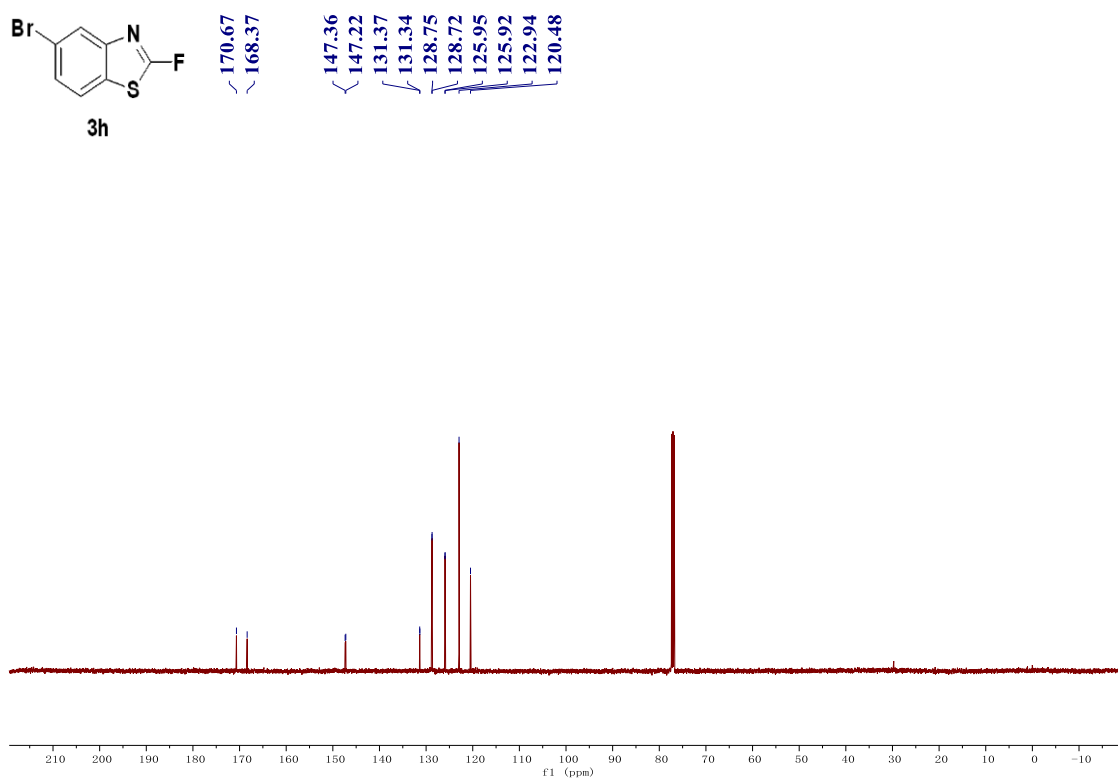

**Fig. 66**  $^{13}\text{C}$  NMR of **3h** in  $\text{CDCl}_3$



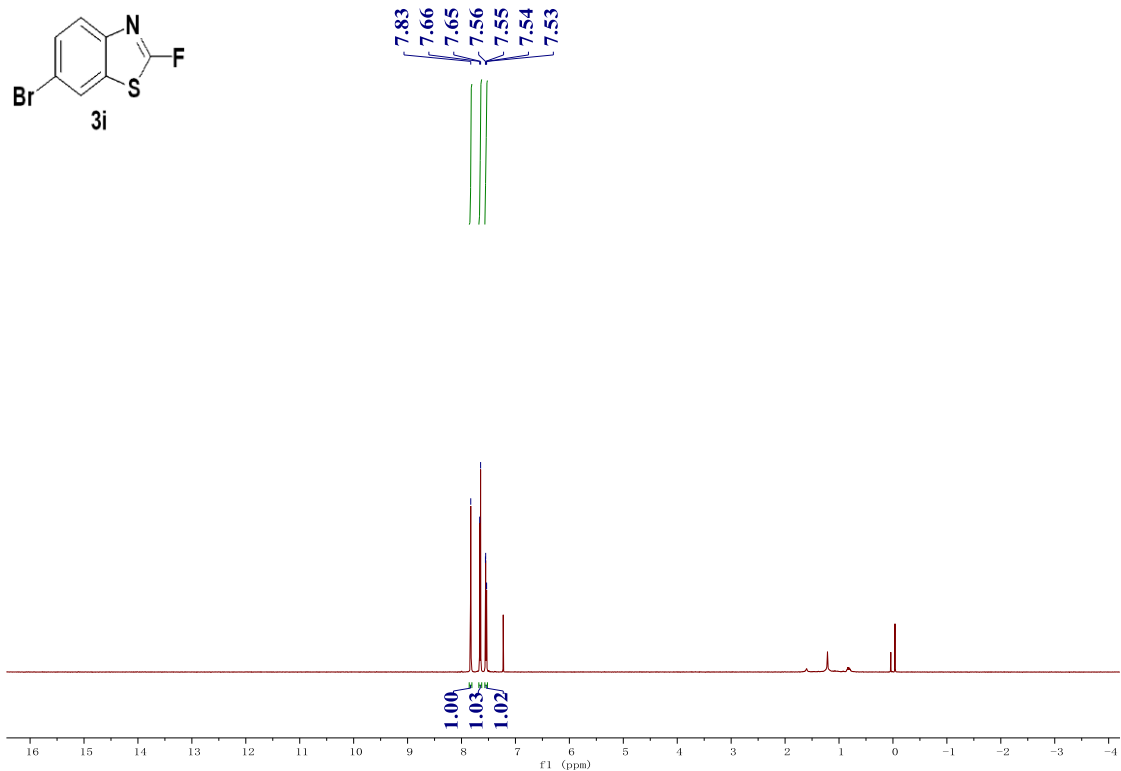

**Fig. 67**  $^1\text{H NMR}$  of **3i** in  $\text{CDCl}_3$

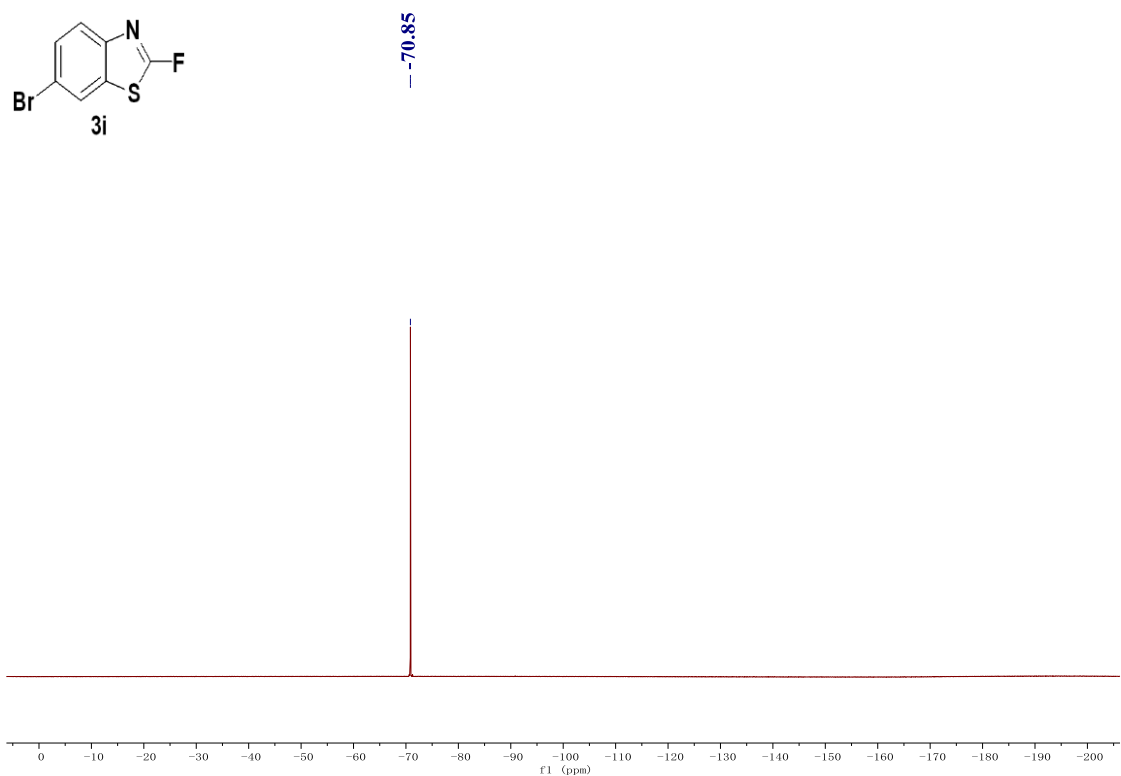

**Fig. 68**  $^{19}\text{F NMR}$  of **3i** in  $\text{CDCl}_3$

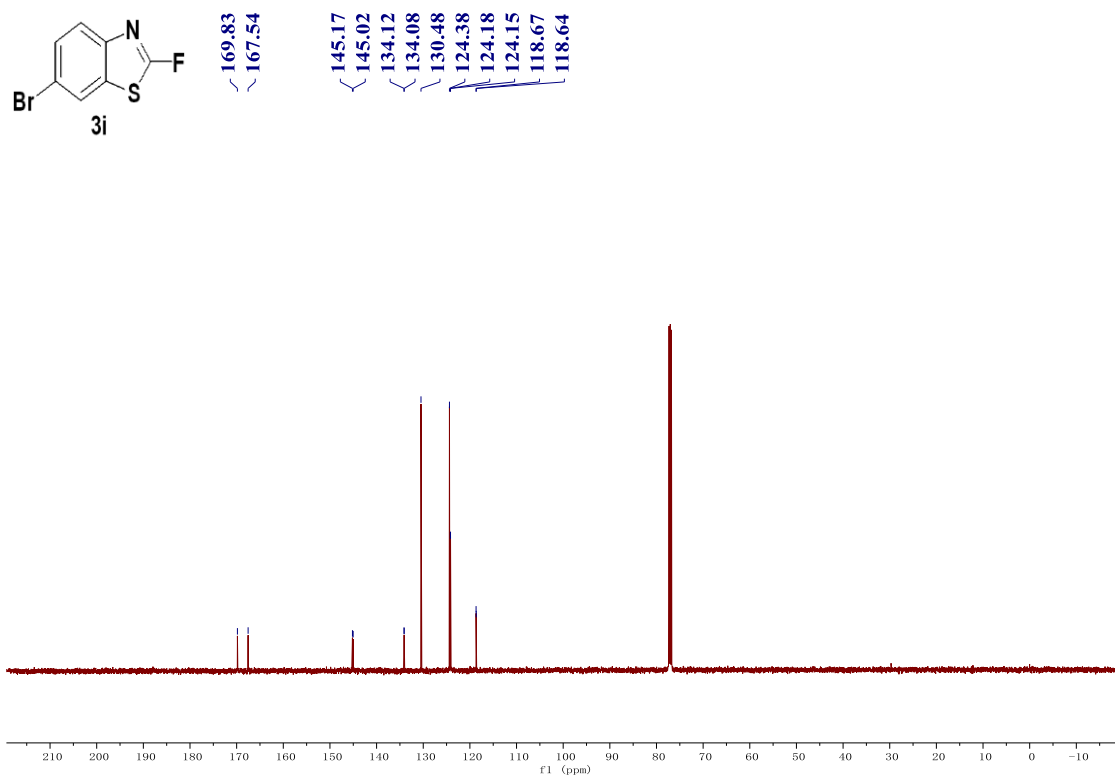

Fig. 69  $^{13}\text{C}$  NMR of **3i** in  $\text{CDCl}_3$

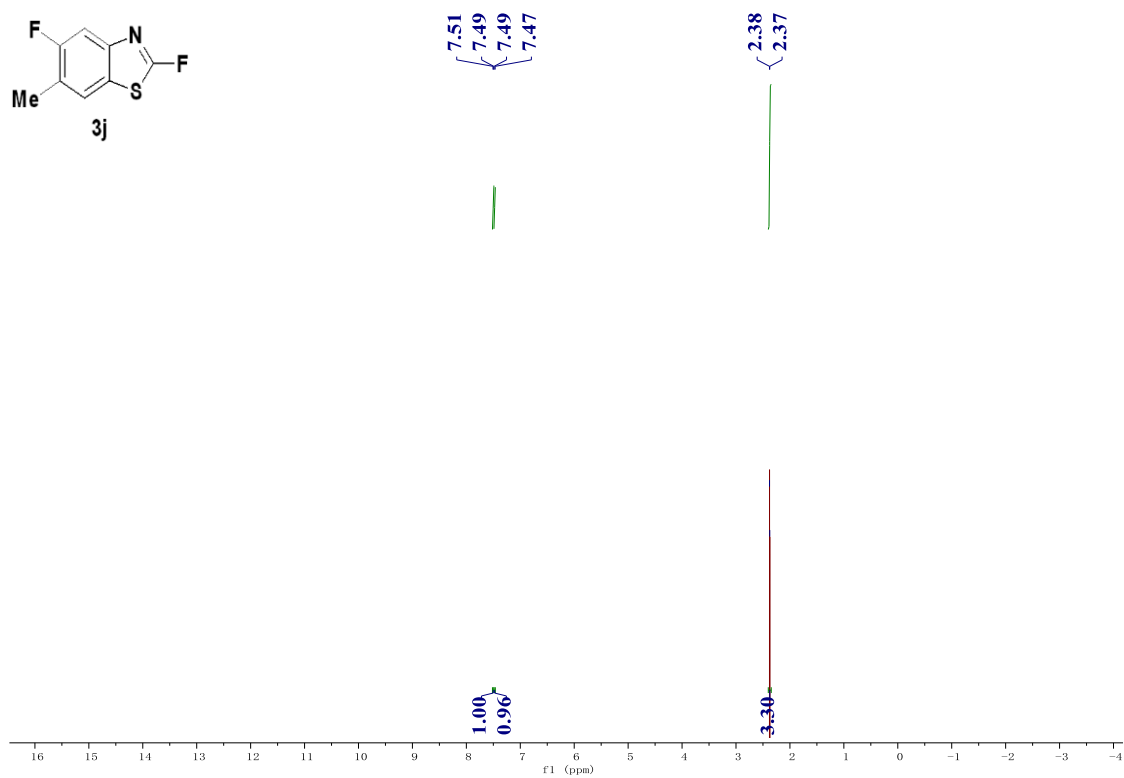

Fig. 70  $^1\text{H}$  NMR of **3j** in  $\text{CDCl}_3$

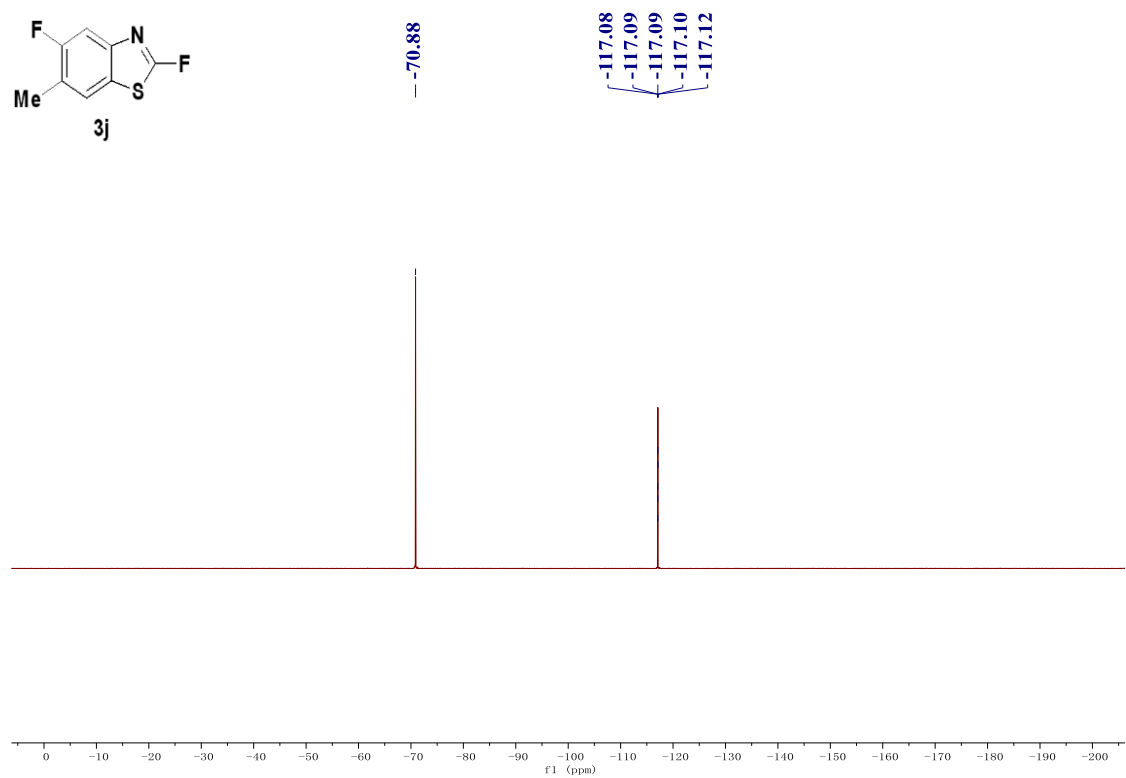

Fig. 71  $^{19}\text{F}$  NMR of 3j in  $\text{CDCl}_3$

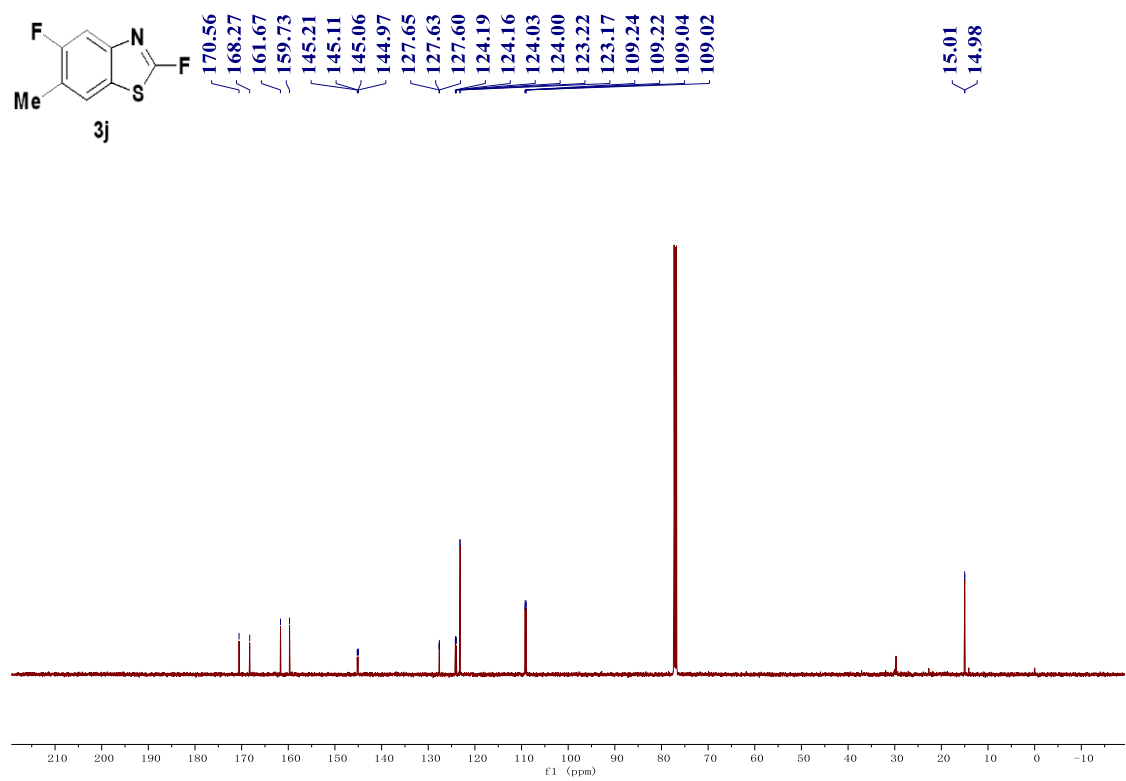

Fig. 72  $^{13}\text{C}$  NMR of 3j in  $\text{CDCl}_3$

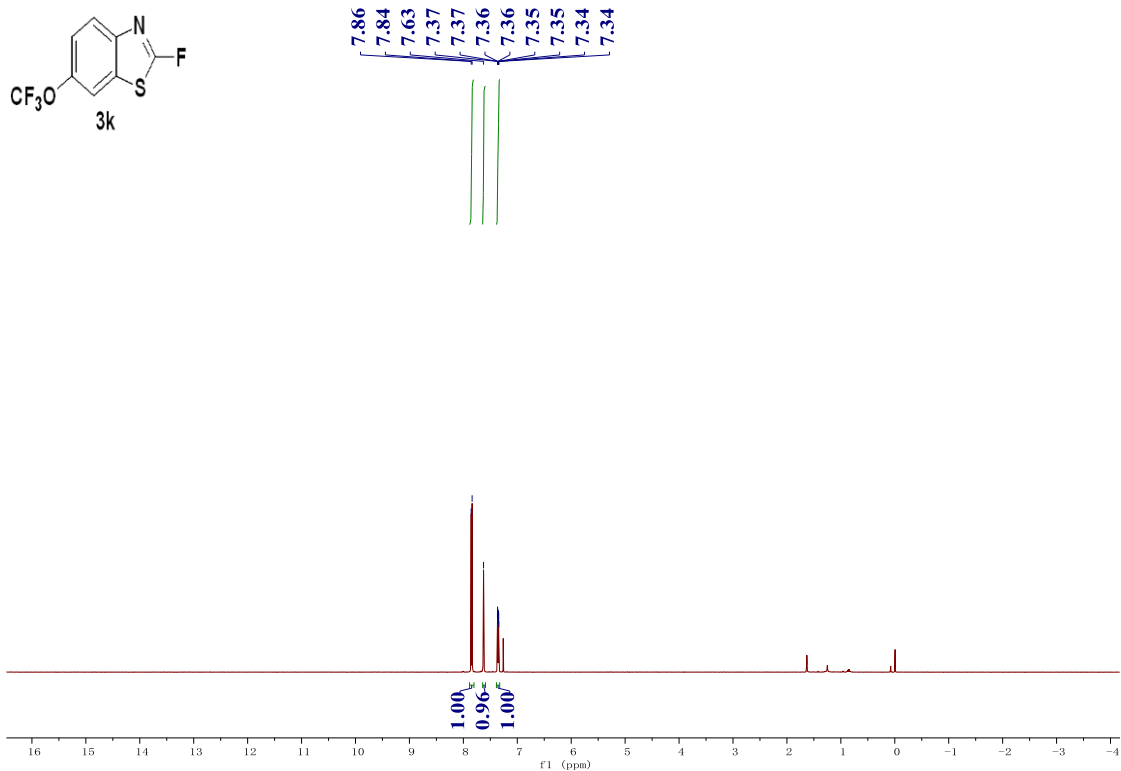

**Fig. 73**  $^1\text{H NMR}$  of **3k** in  $\text{CDCl}_3$

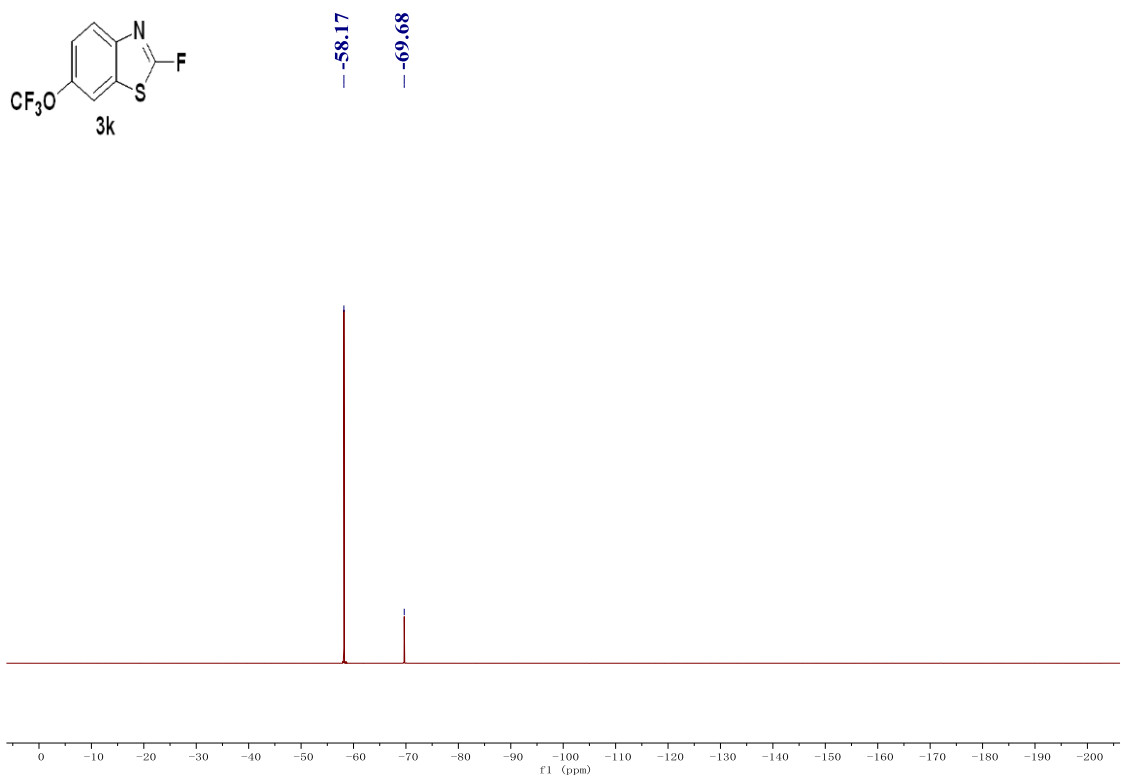

**Fig. 74**  $^{19}\text{F NMR}$  of **3k** in  $\text{CDCl}_3$

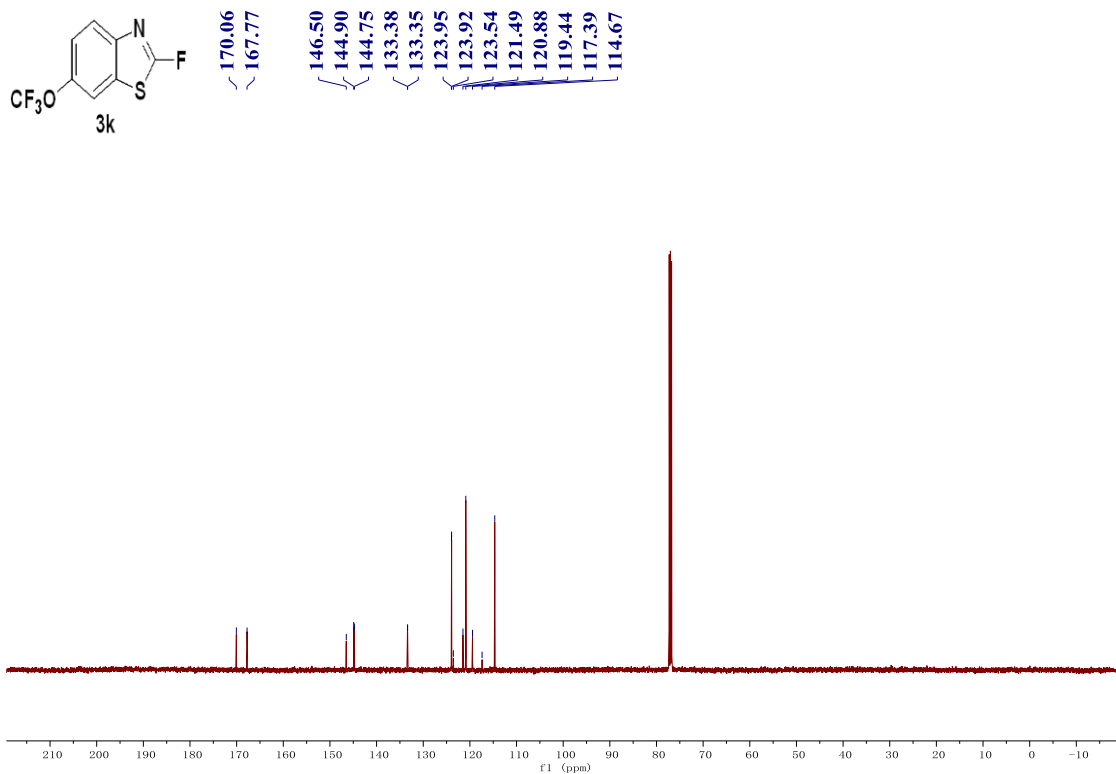

Fig. 75  $^{13}\text{C}$  NMR of **3k** in  $\text{CDCl}_3$

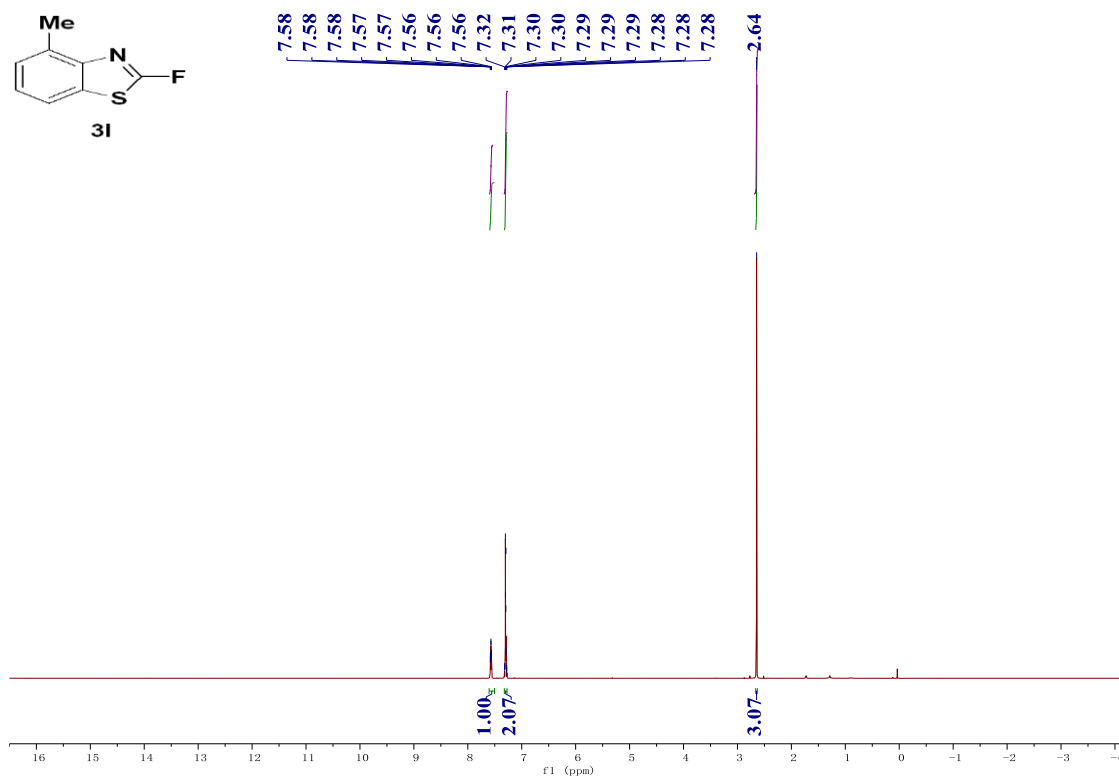

Fig. 76  $^1\text{H}$  NMR of **3l** in  $\text{CDCl}_3$

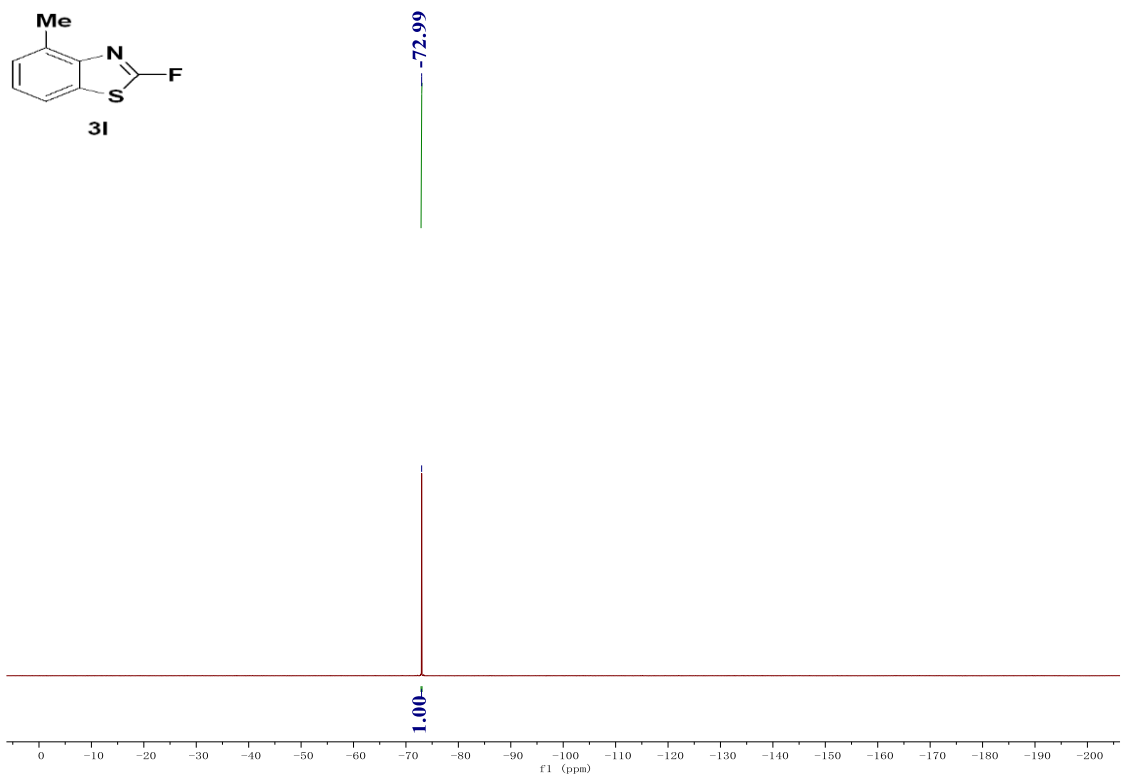

**Fig. 77**  $^{19}\text{F}$  NMR of **3I** in  $\text{CDCl}_3$

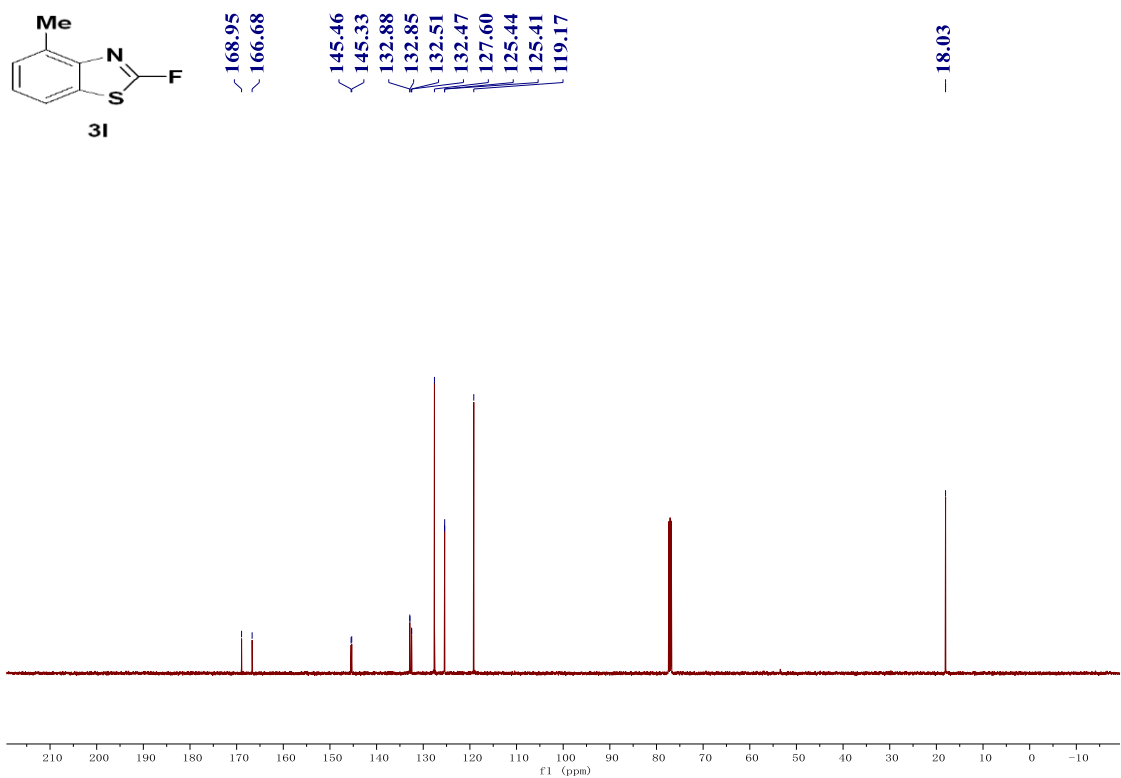

**Fig. 78**  $^{13}\text{C}$  NMR of **3I** in  $\text{CDCl}_3$

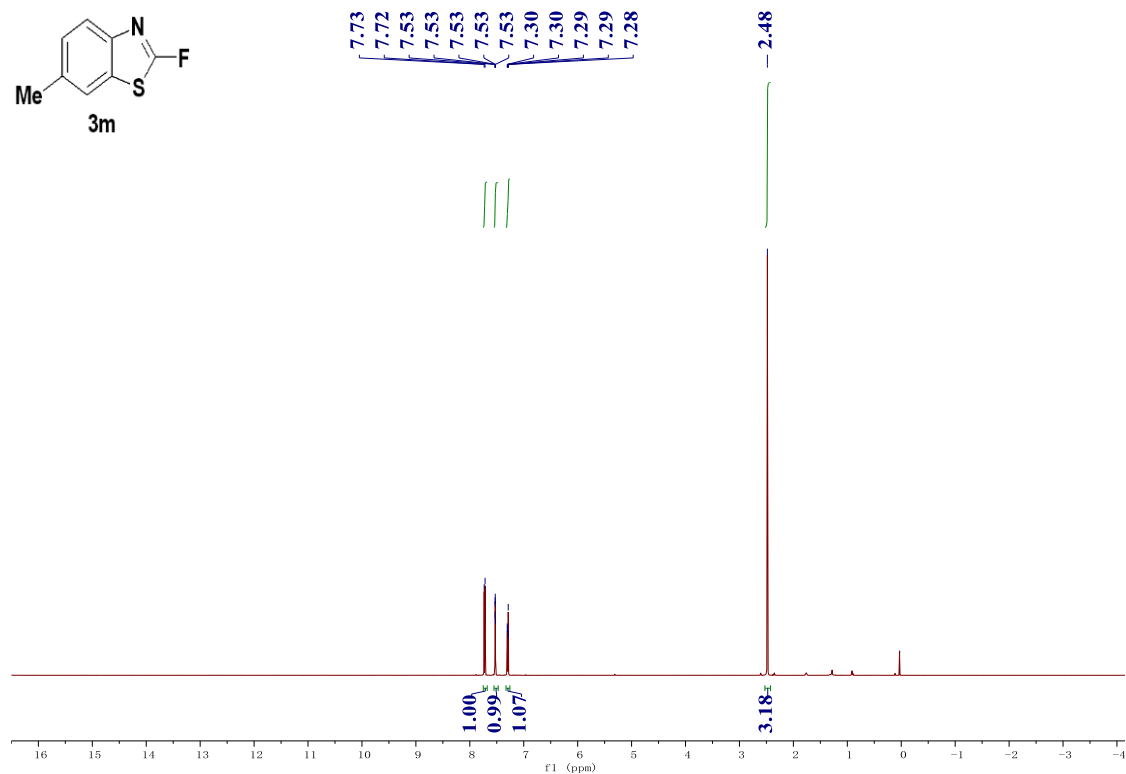

**Fig. 79**  $^1\text{H}$  NMR of 3m in  $\text{CDCl}_3$

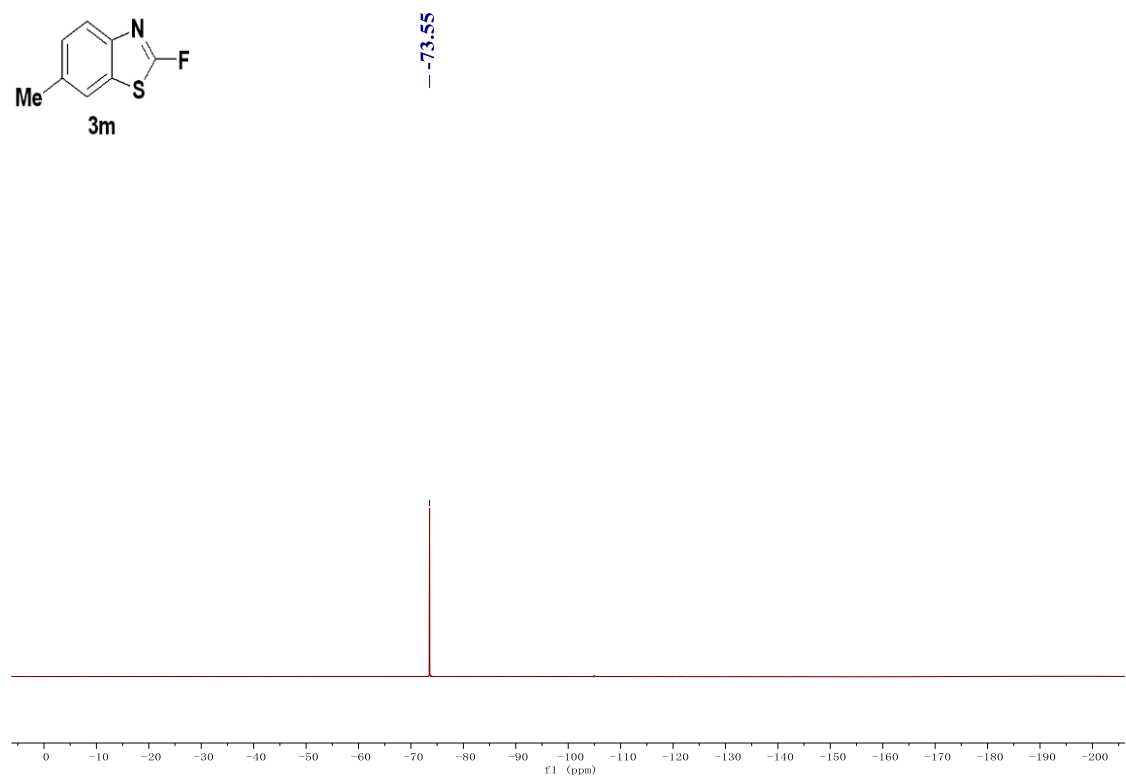

**Fig. 80**  $^{19}\text{F}$  NMR of 3m in  $\text{CDCl}_3$

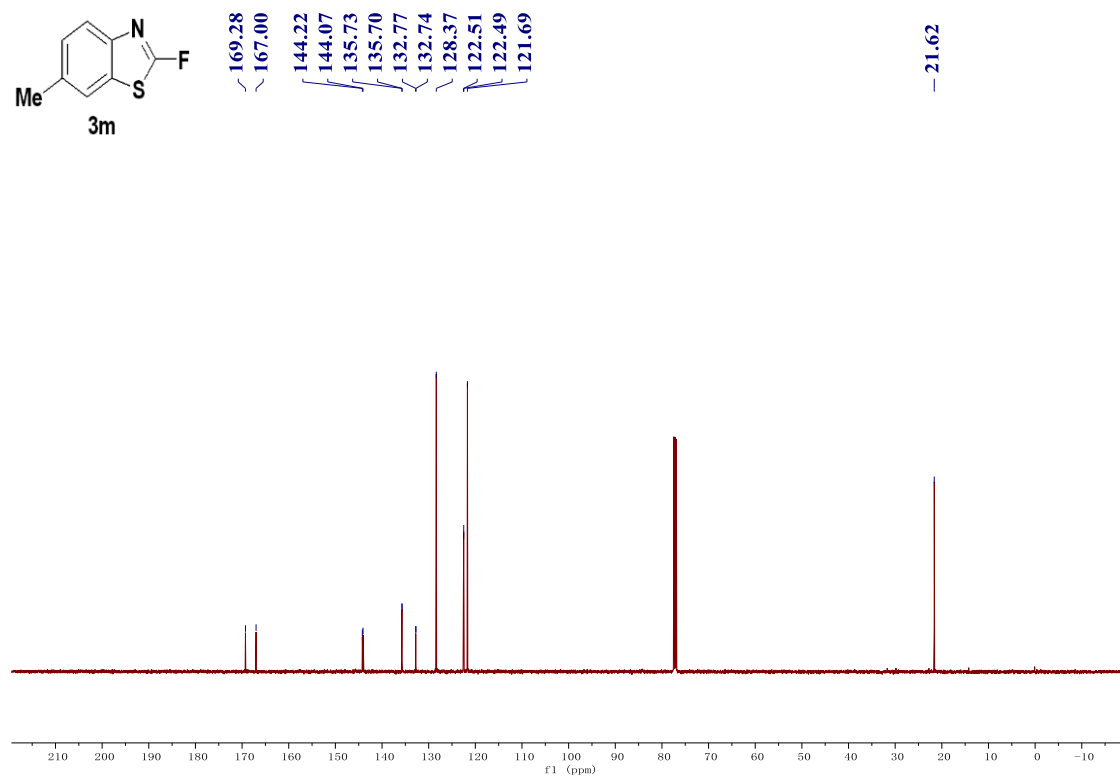

**Fig. 81**  $^{13}\text{C}$  NMR of **3m** in  $\text{CDCl}_3$

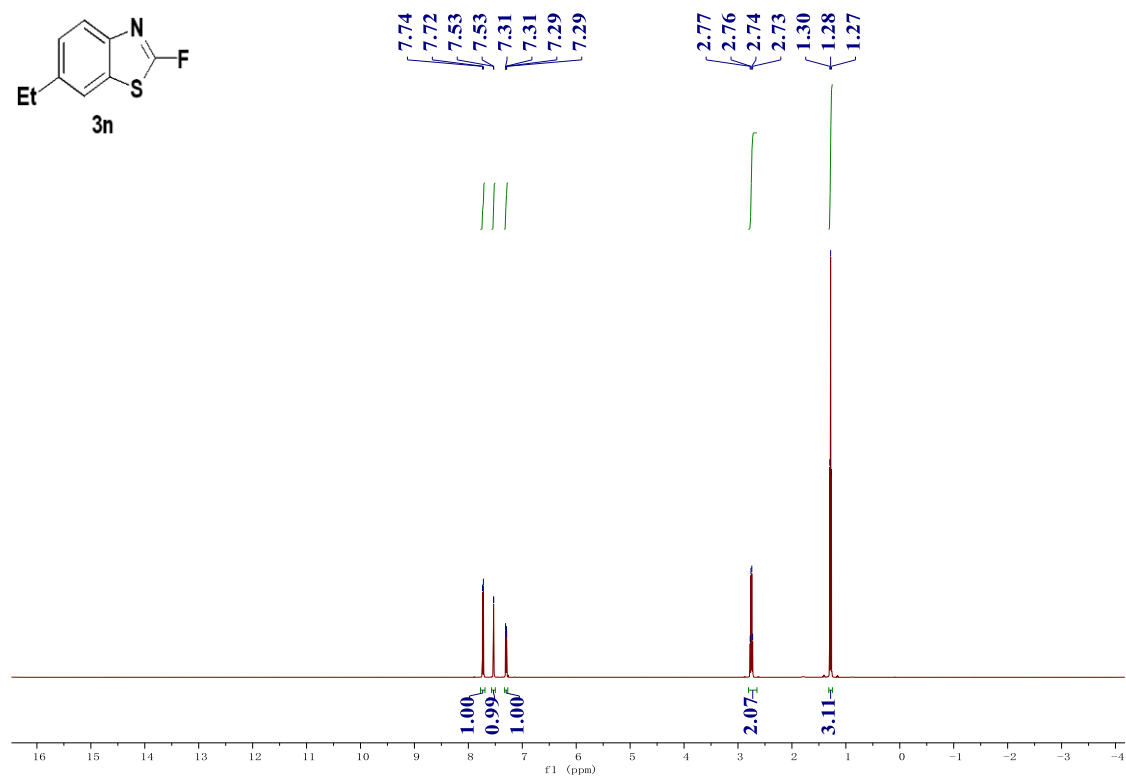

**Fig. 82**  $^1\text{H}$  NMR of **3n** in  $\text{CDCl}_3$



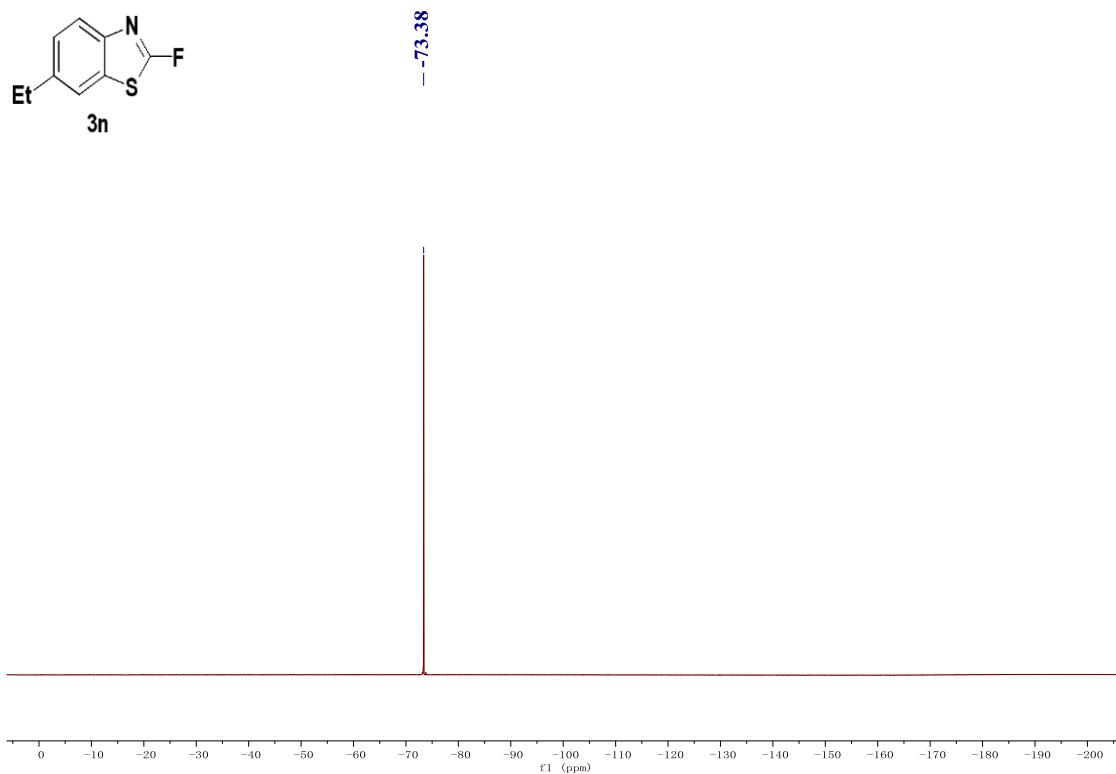

Fig. 83  $^{19}\text{F}$  NMR of 3n in  $\text{CDCl}_3$

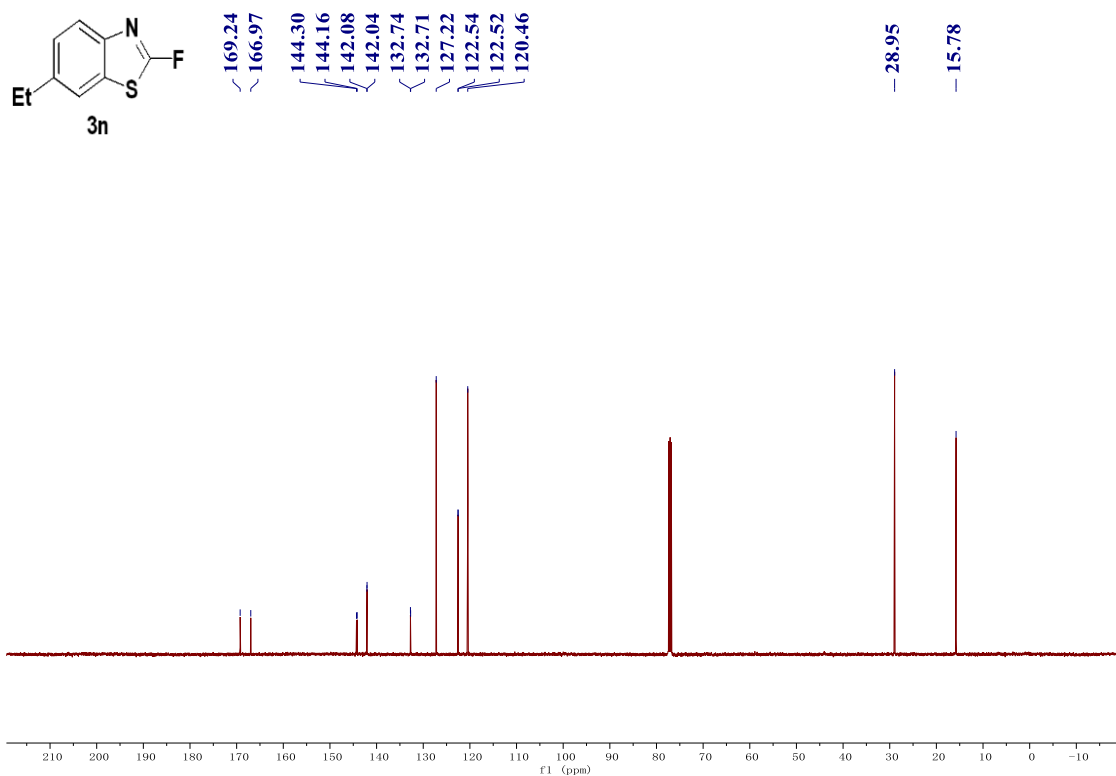

Fig. 84  $^{13}\text{C}$  NMR of 3n in  $\text{CDCl}_3$

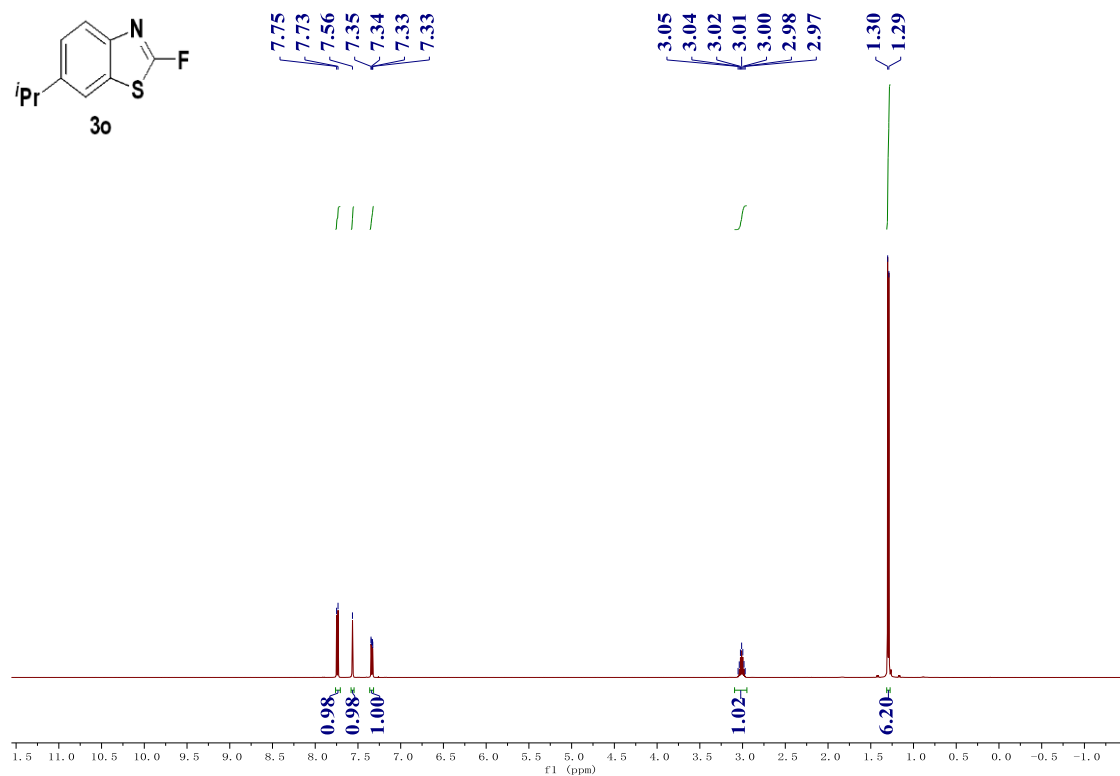

**Fig. 85**  $^1\text{H}$  NMR of **3o** in  $\text{CDCl}_3$

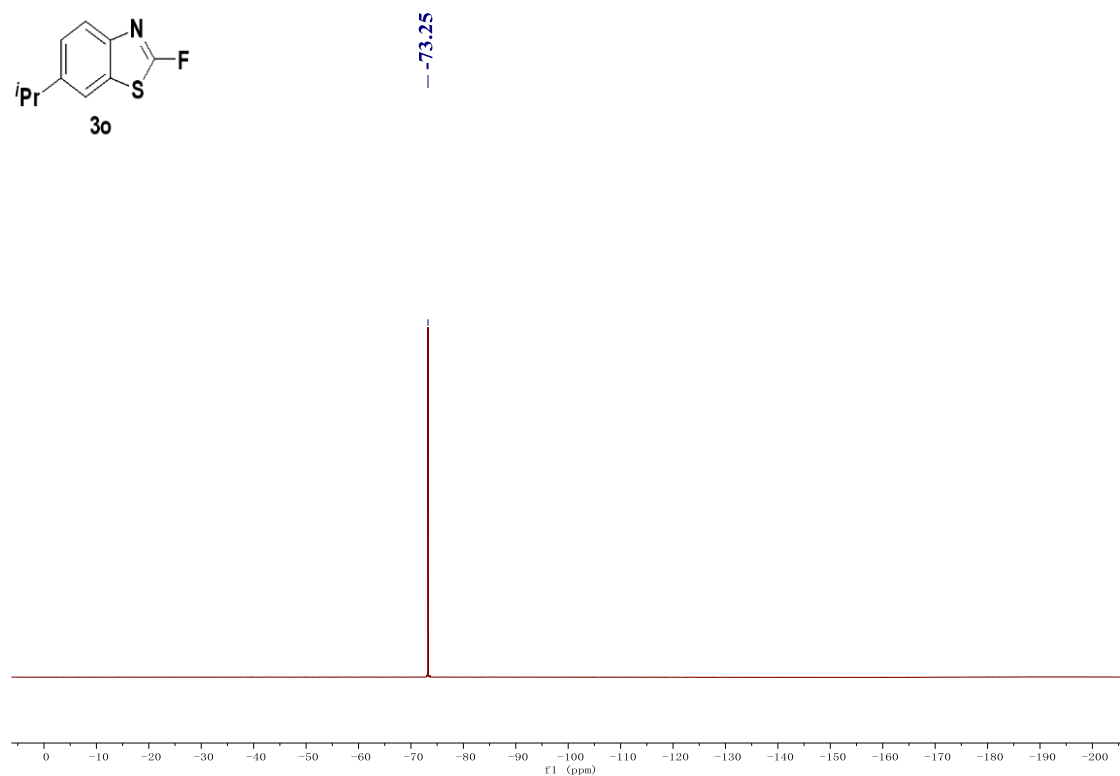

**Fig. 86**  $^{19}\text{F}$  NMR of **3o** in  $\text{CDCl}_3$

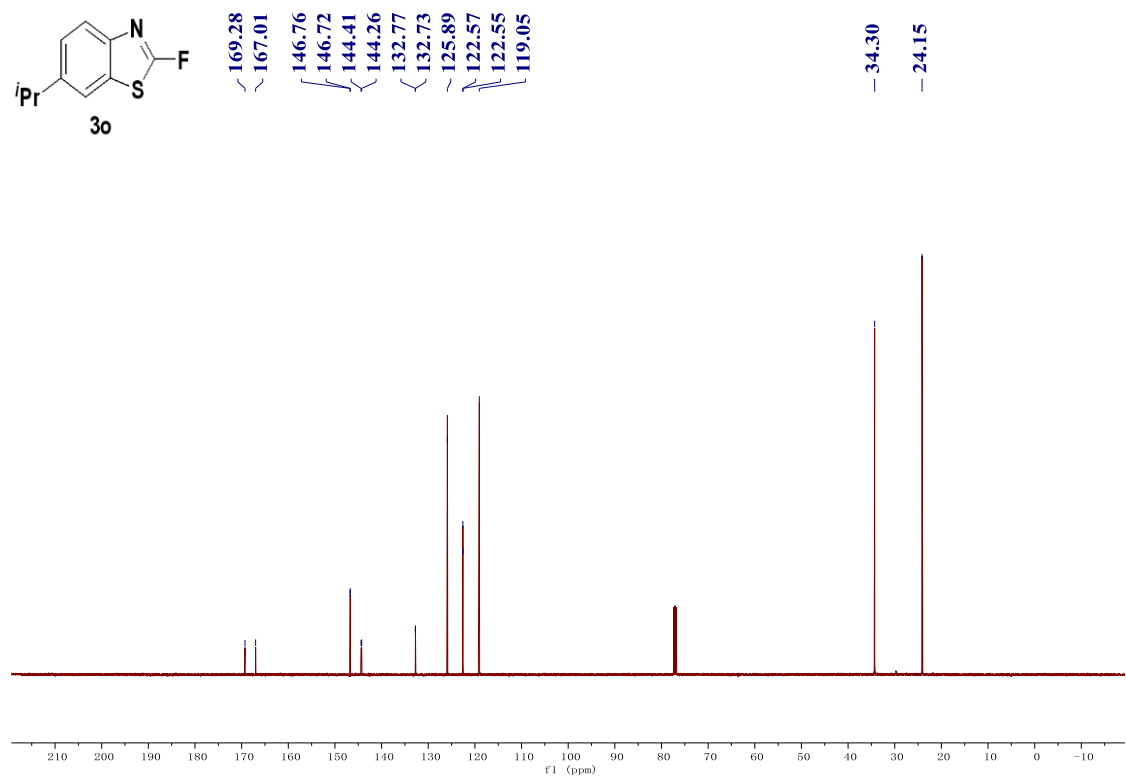

**Fig. 87**  $^{13}\text{C}$  NMR of **3o** in  $\text{CDCl}_3$

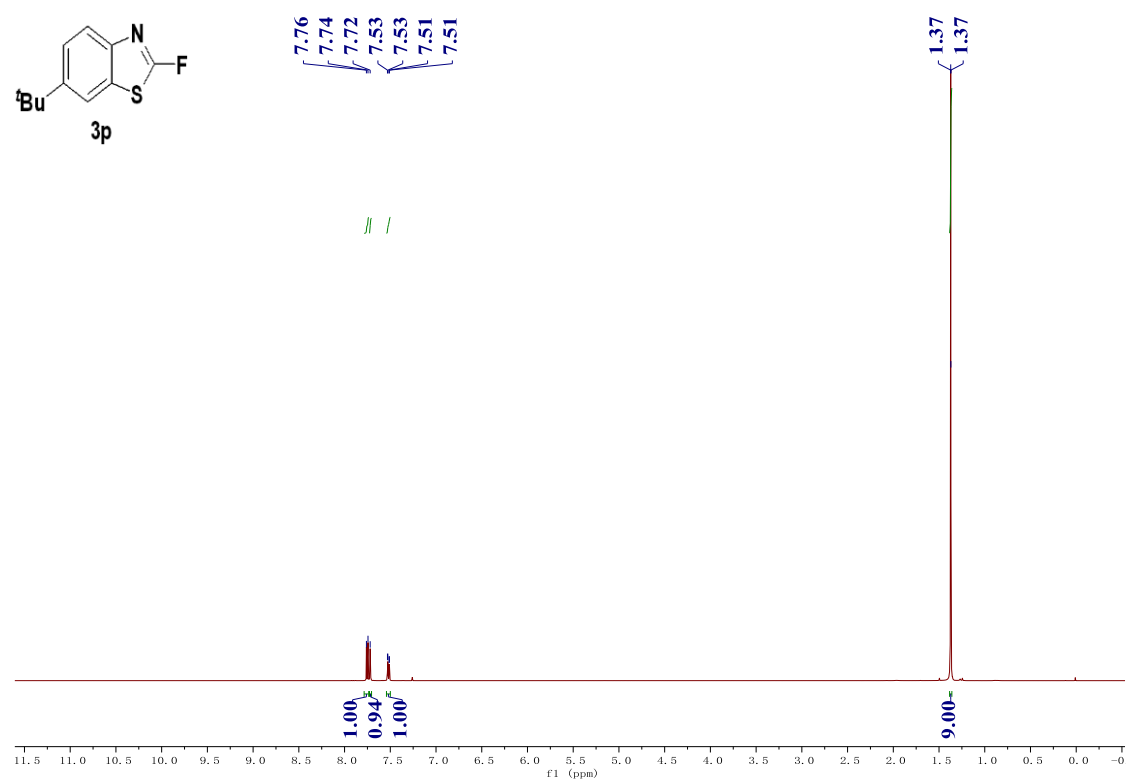

**Fig. 88**  $^1\text{H}$  NMR of **3p** in  $\text{CDCl}_3$

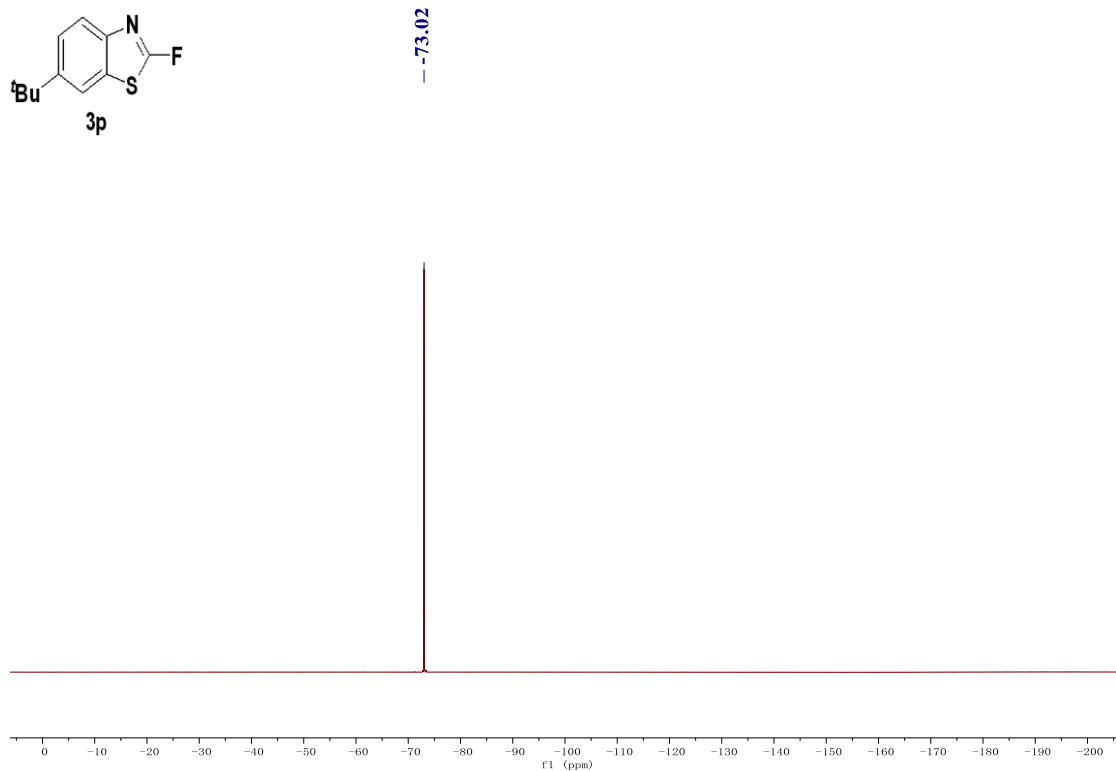

Fig. 89  $^{19}\text{F}$  NMR of 3p in  $\text{CDCl}_3$

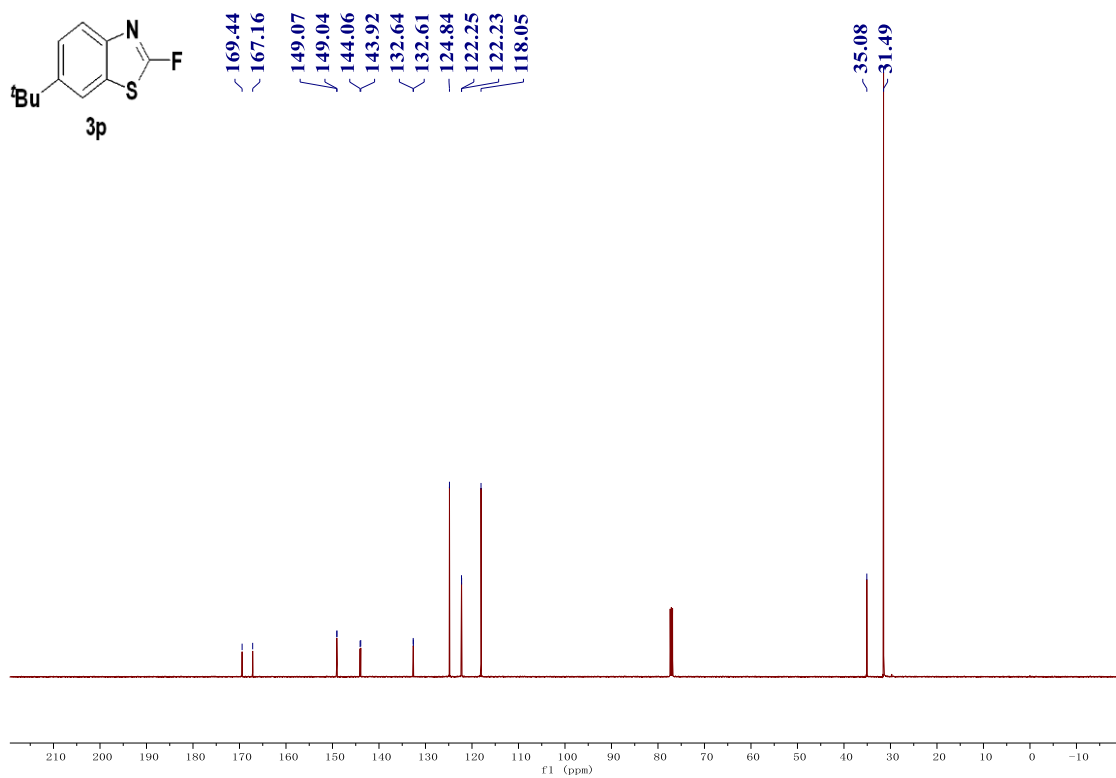

Fig. 90  $^{13}\text{C}$  NMR of 3p in  $\text{CDCl}_3$

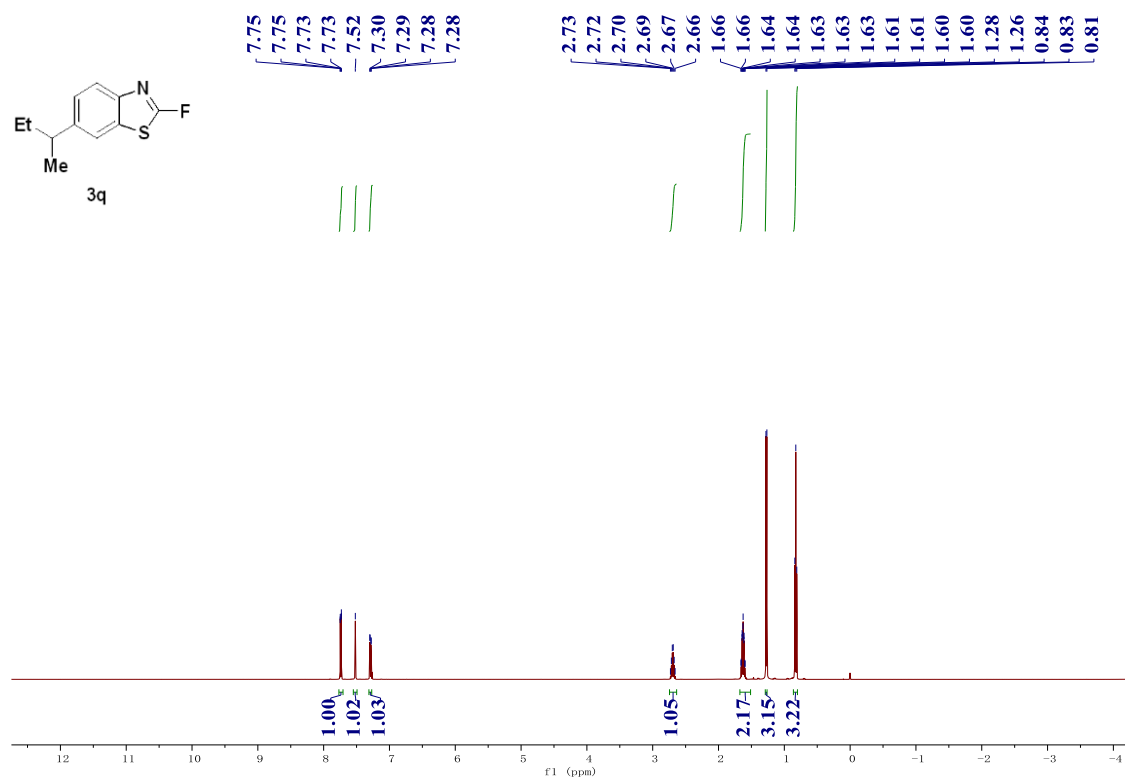

**Fig. 91** <sup>1</sup>H NMR of **3q** in CDCl<sub>3</sub>

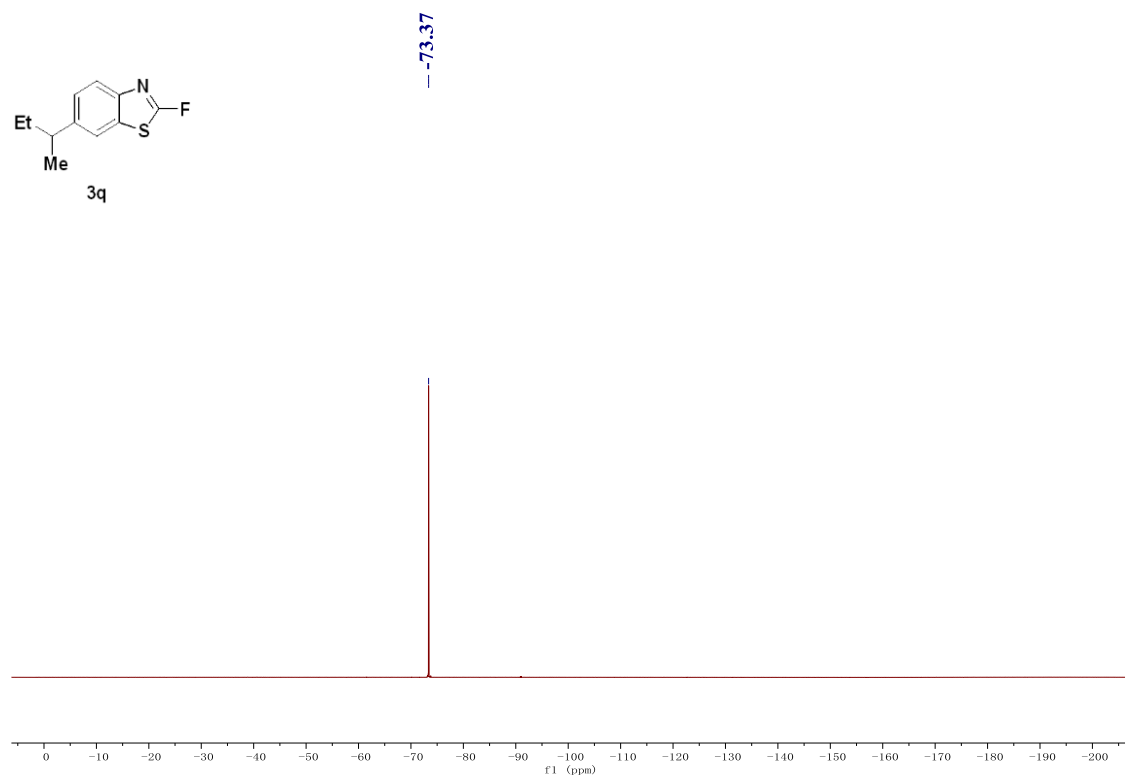

**Fig. 92** <sup>19</sup>F NMR of **3q** in CDCl<sub>3</sub>

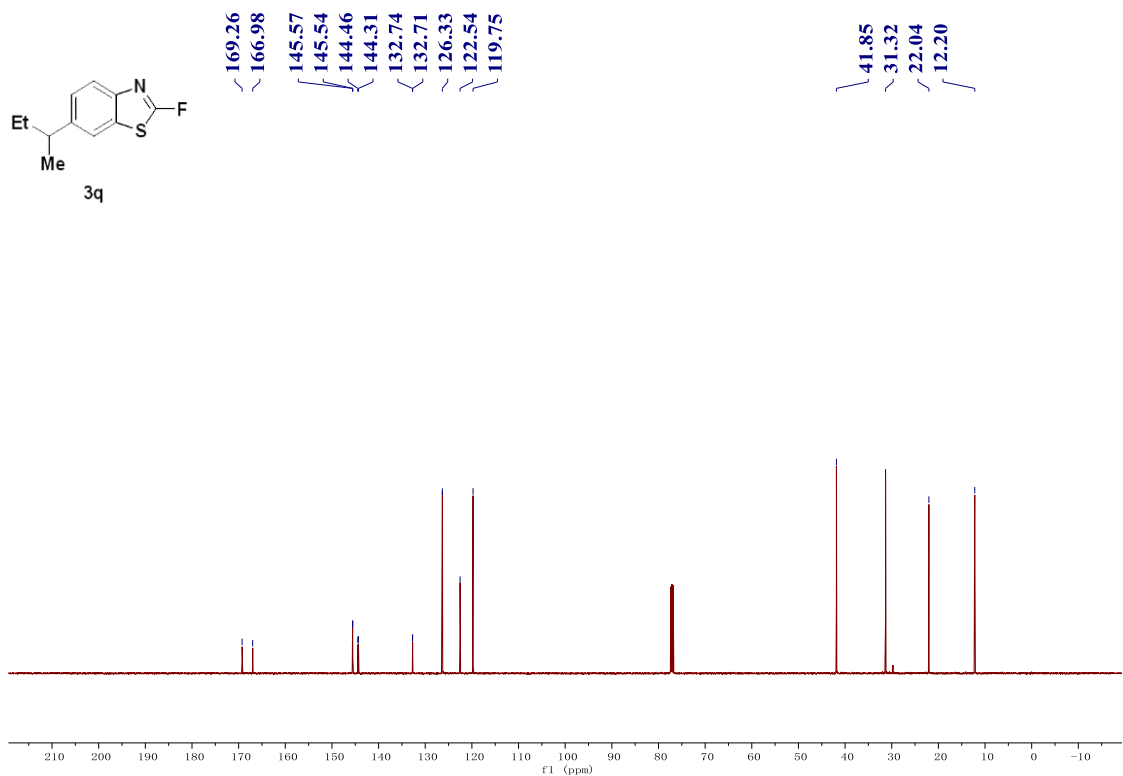

**Fig. 93**  $^{13}\text{C}$  NMR of **3q** in  $\text{CDCl}_3$

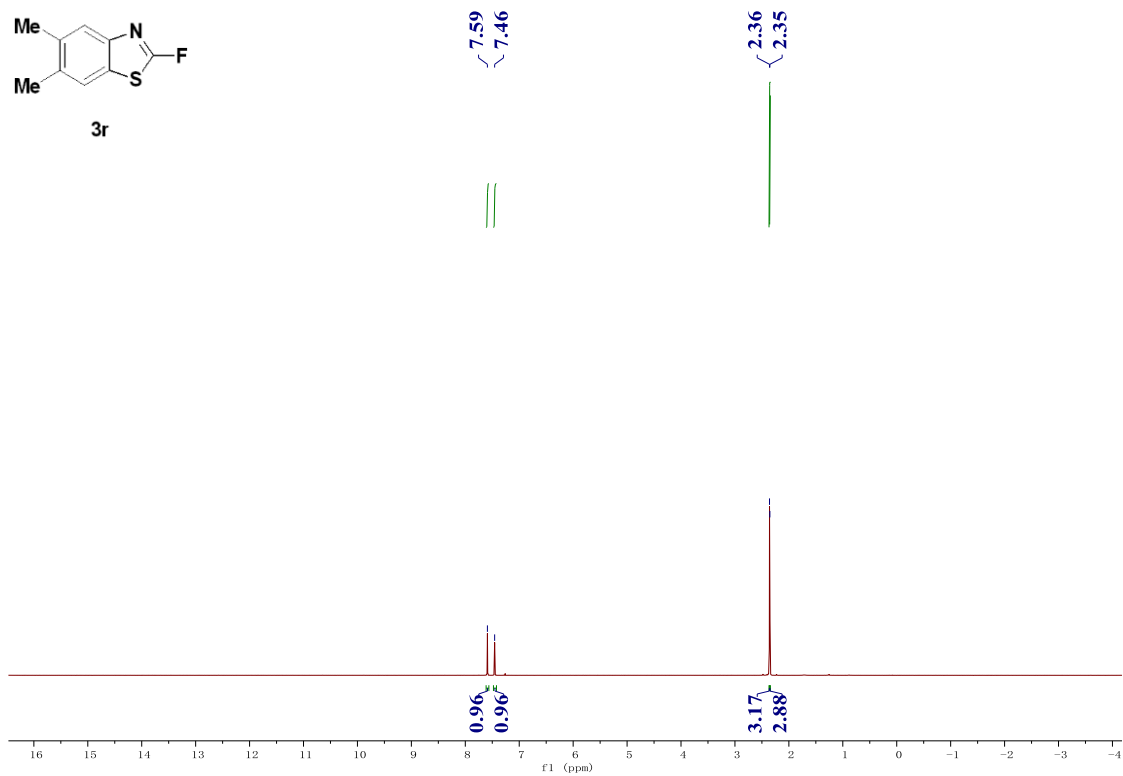

**Fig. 94**  $^1\text{H}$  NMR of **3r** in  $\text{CDCl}_3$

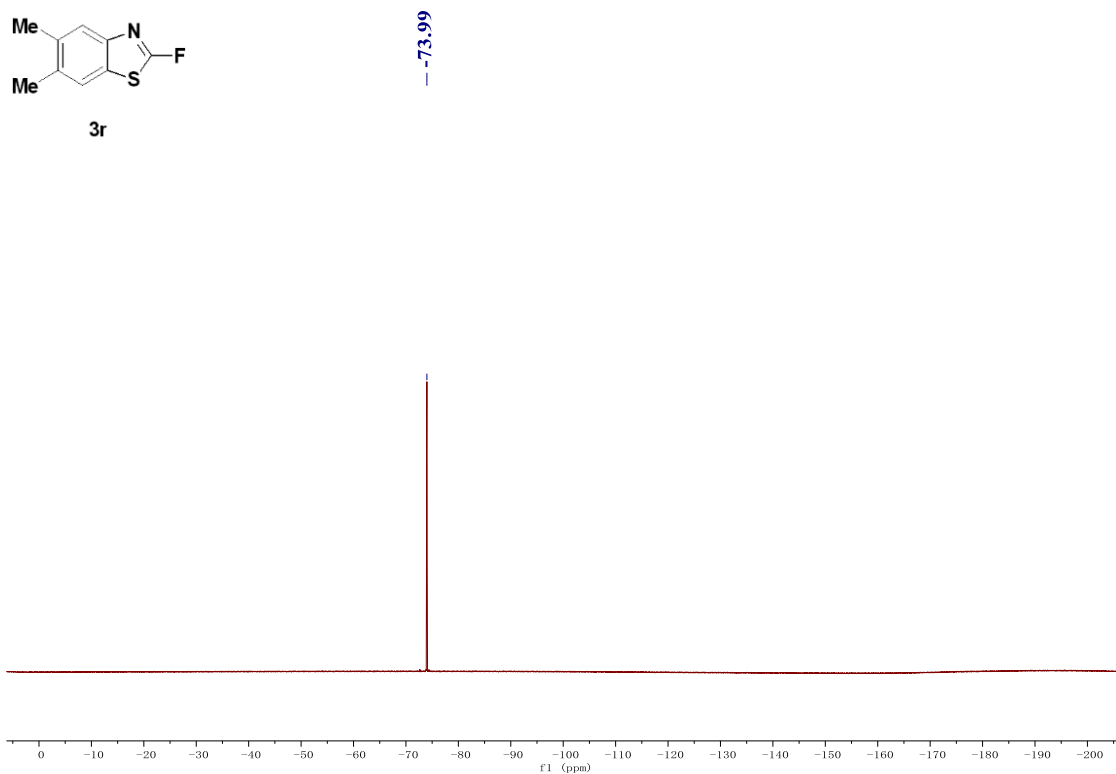

**Fig. 95**  $^{19}\text{F}$  NMR of **3r** in  $\text{CDCl}_3$

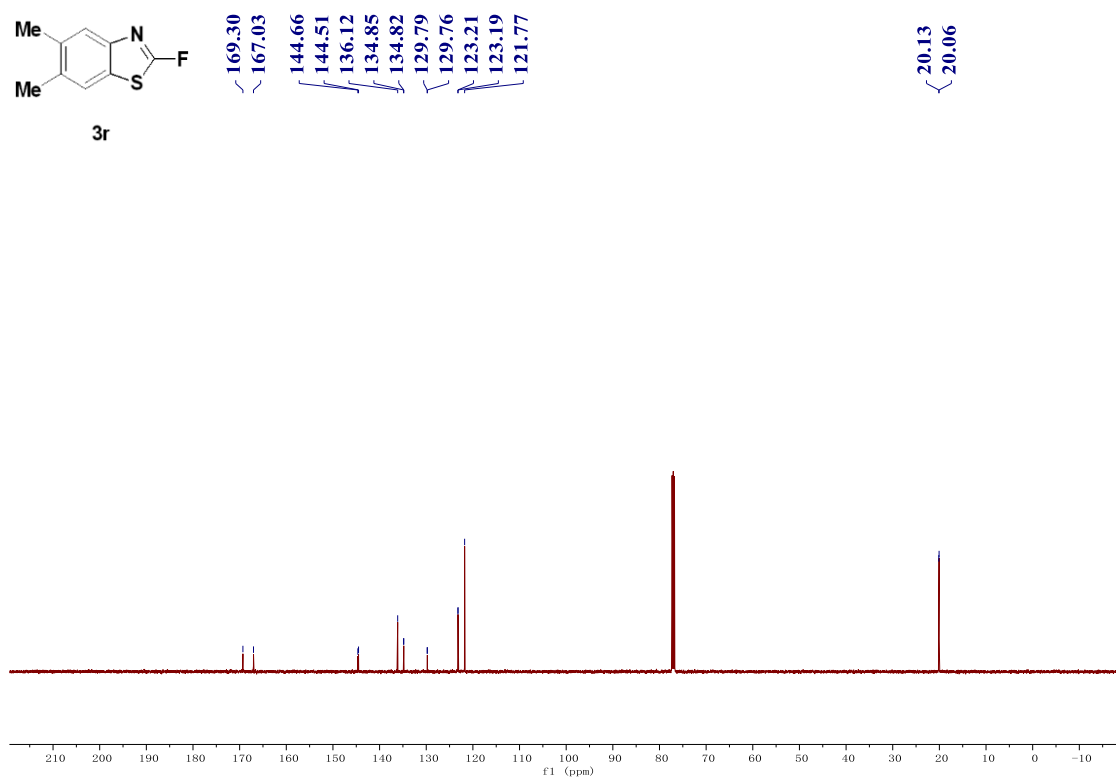

**Fig. 96**  $^{13}\text{C}$  NMR of **3r** in  $\text{CDCl}_3$

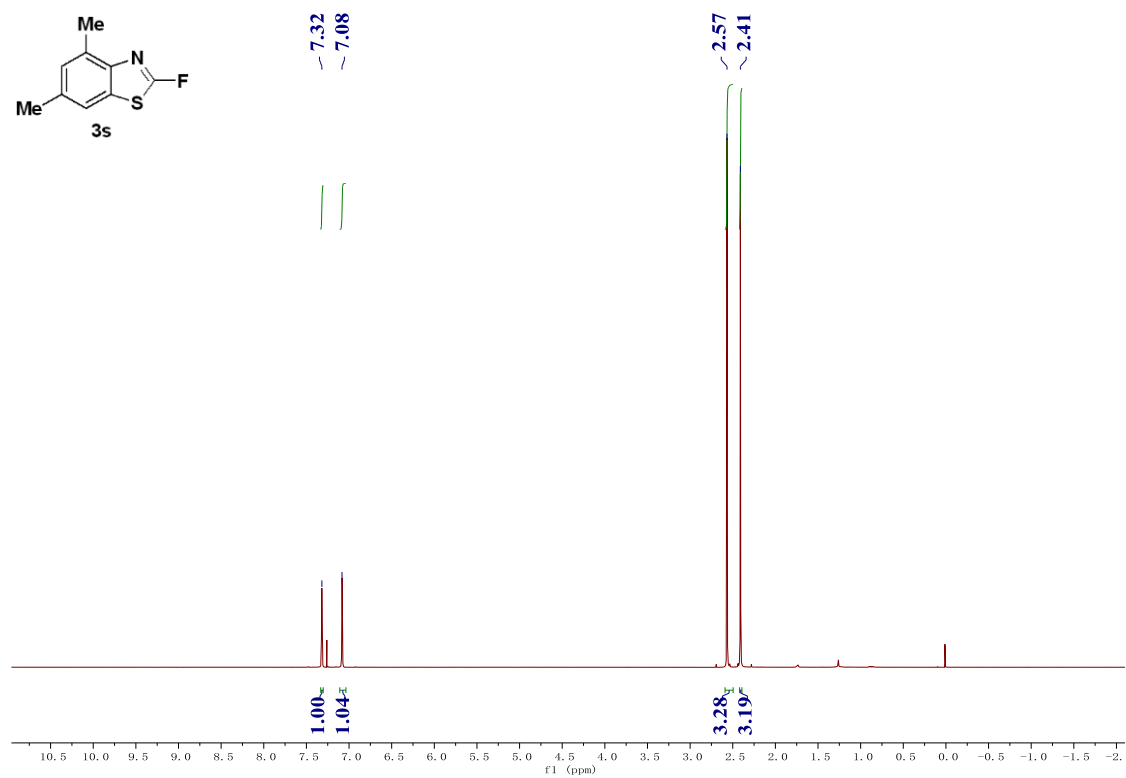

Fig. 97  $^1\text{H}$  NMR of 3s in  $\text{CDCl}_3$

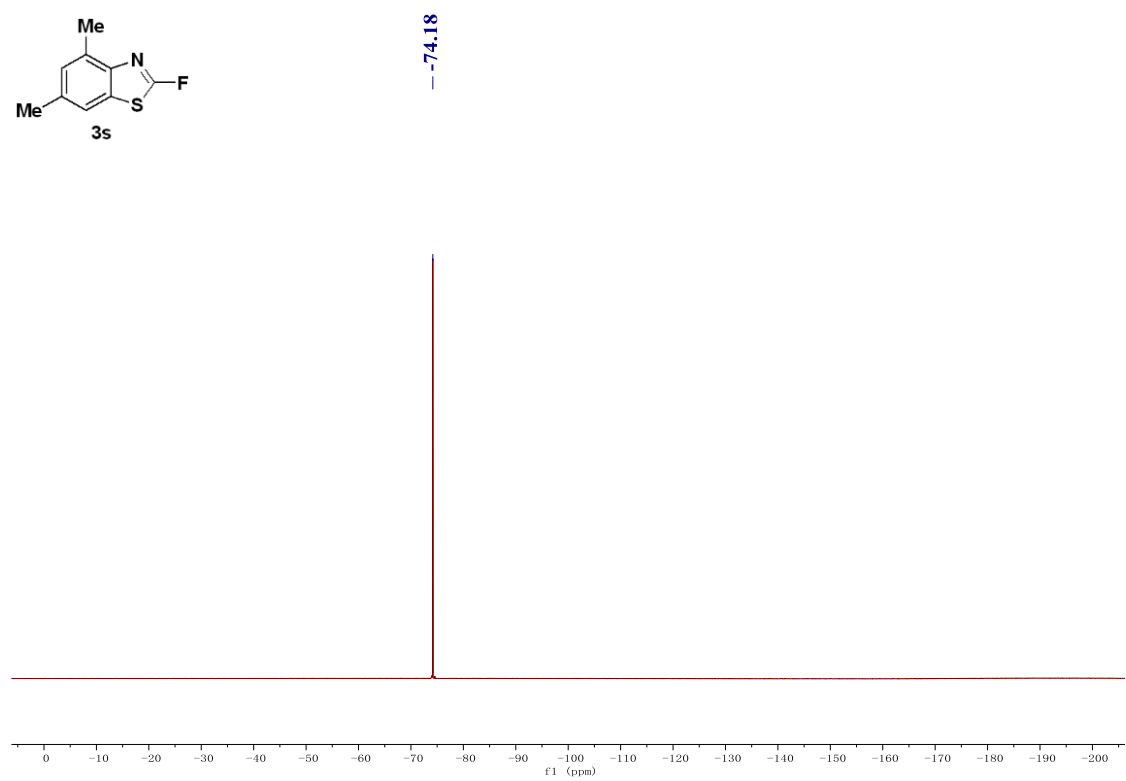

Fig. 98  $^{19}\text{F}$  NMR of 3s in  $\text{CDCl}_3$



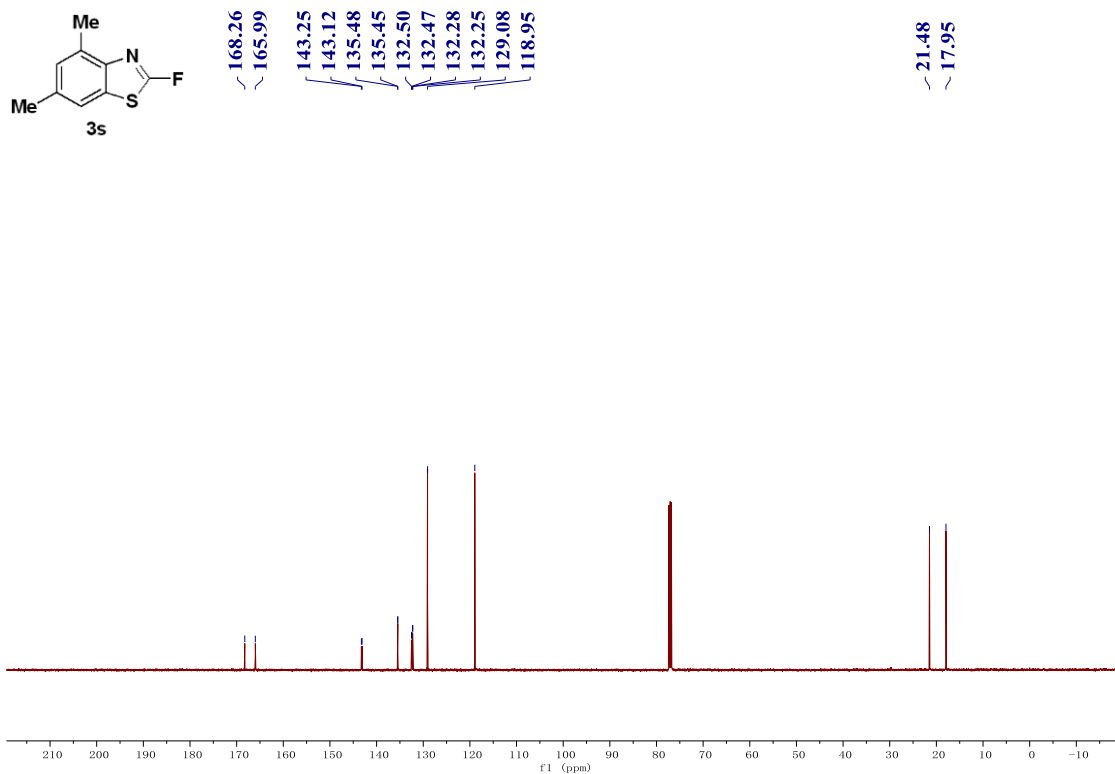

**Fig. 99**  $^{13}\text{C}$  NMR of **3s** in  $\text{CDCl}_3$

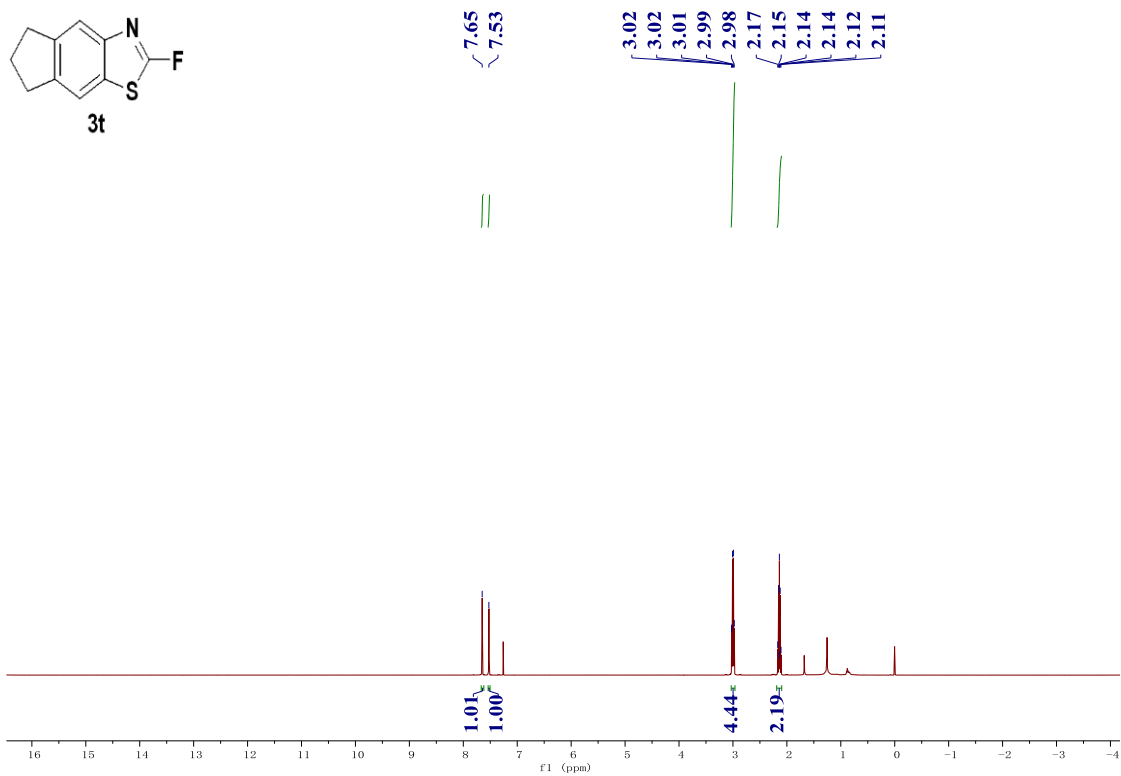

**Fig. 100**  $^1\text{H}$  NMR of **3t** in  $\text{CDCl}_3$

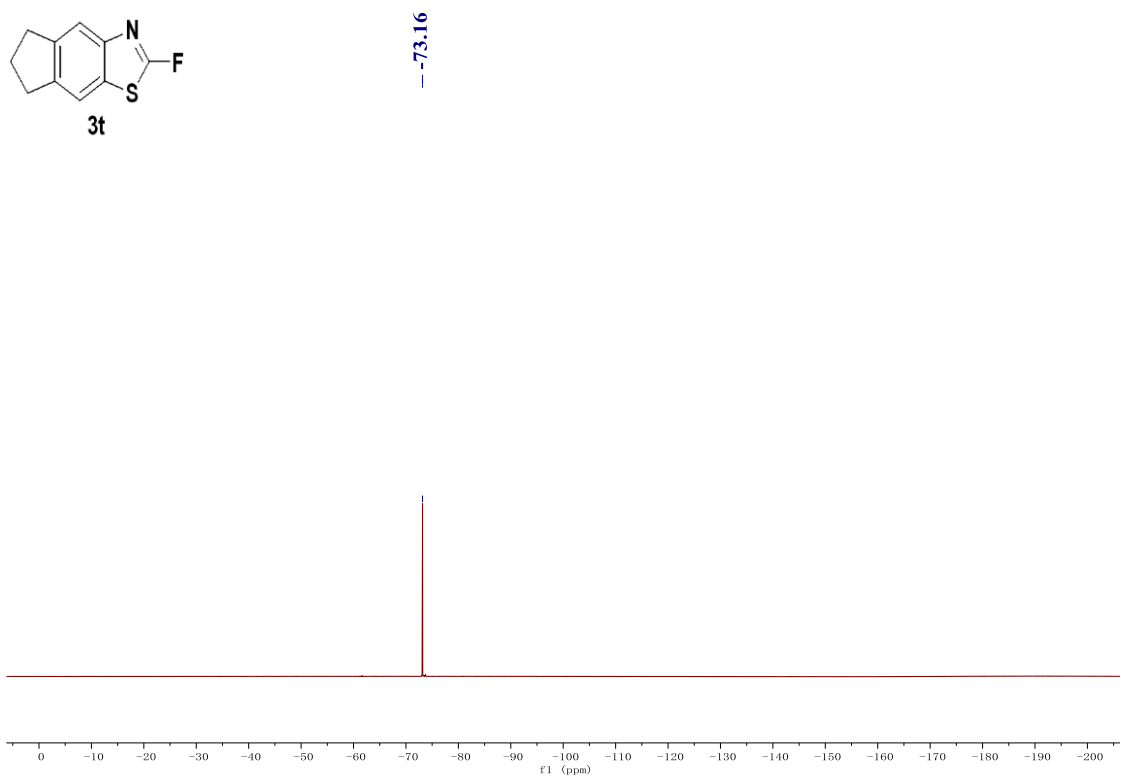

**Fig. 101**  $^{19}\text{F}$  NMR of **3t** in  $\text{CDCl}_3$

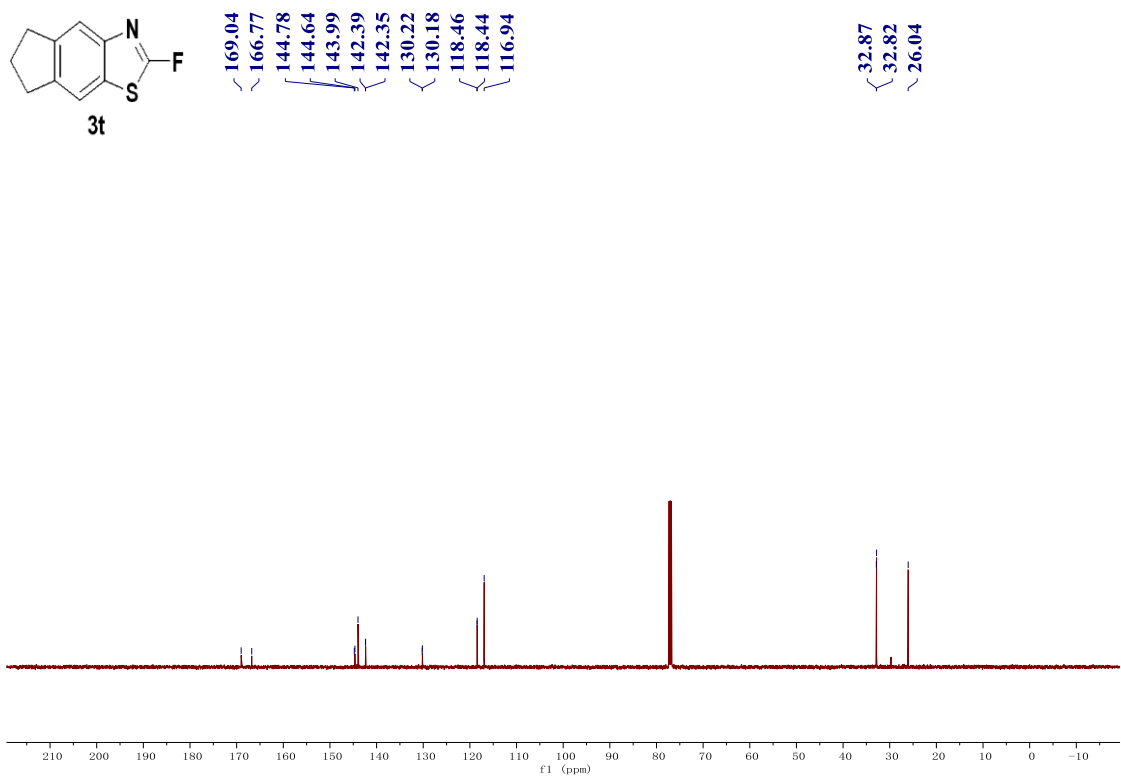

**Fig. 102**  $^{13}\text{C}$  NMR of **3t** in  $\text{CDCl}_3$

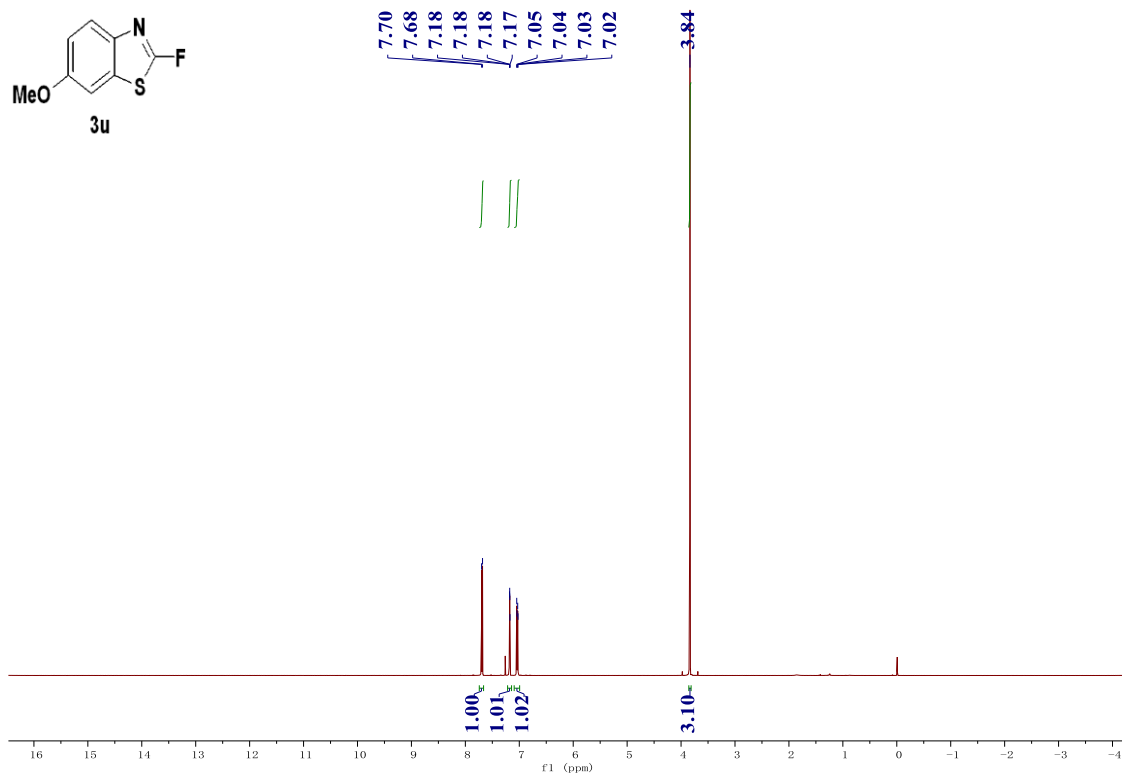

**Fig. 103**  $^1\text{H NMR}$  of **3u** in  $\text{CDCl}_3$

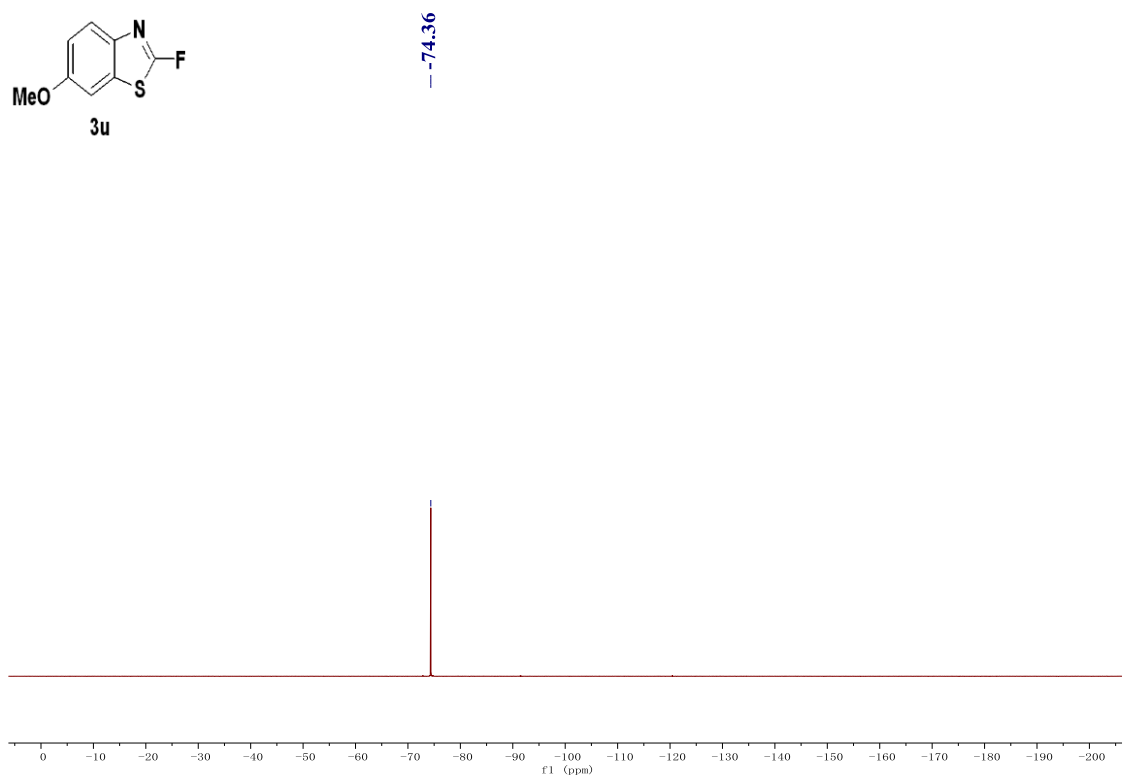

**Fig. 104**  $^{19}\text{F NMR}$  of **3u** in  $\text{CDCl}_3$

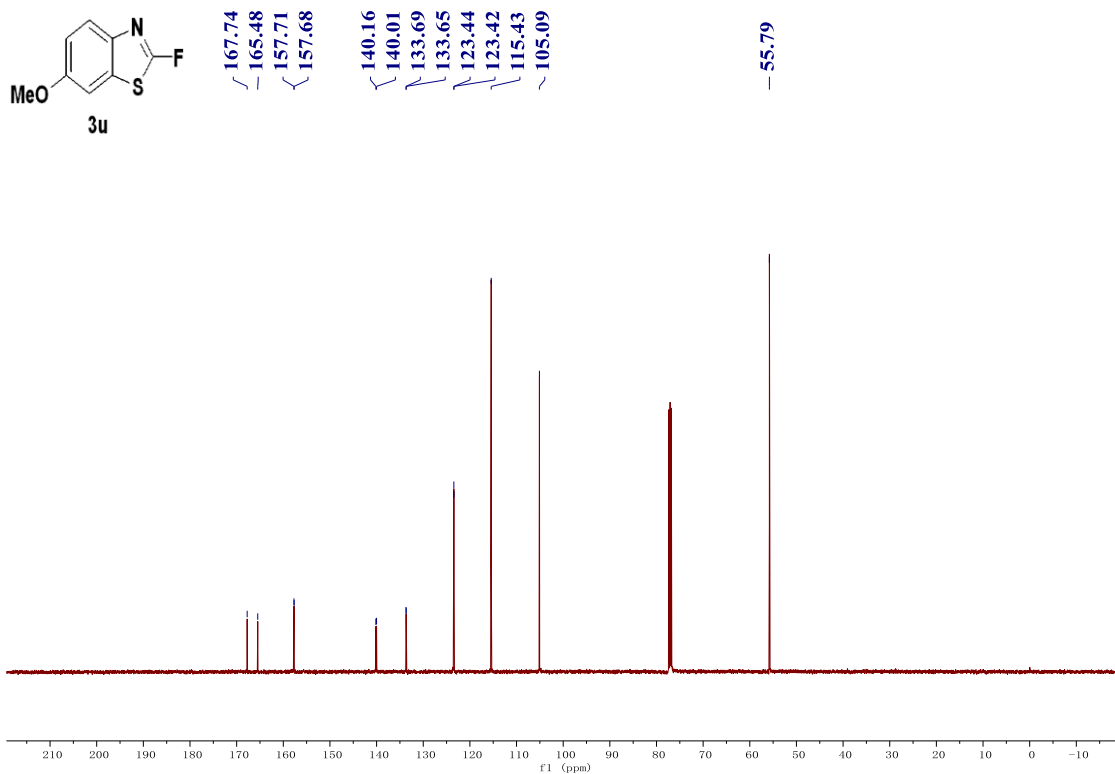

**Fig. 105**  $^{13}\text{C}$  NMR of **3u** in  $\text{CDCl}_3$

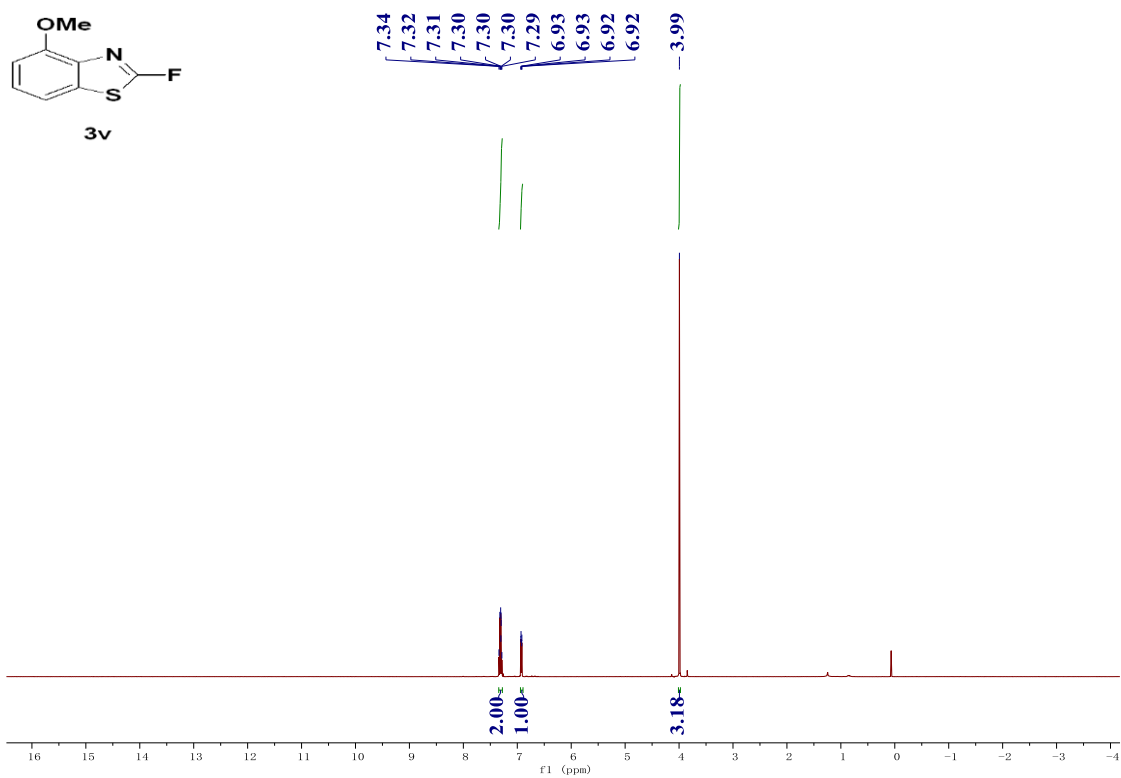

**Fig. 106**  $^1\text{H}$  NMR of **3v** in  $\text{CDCl}_3$

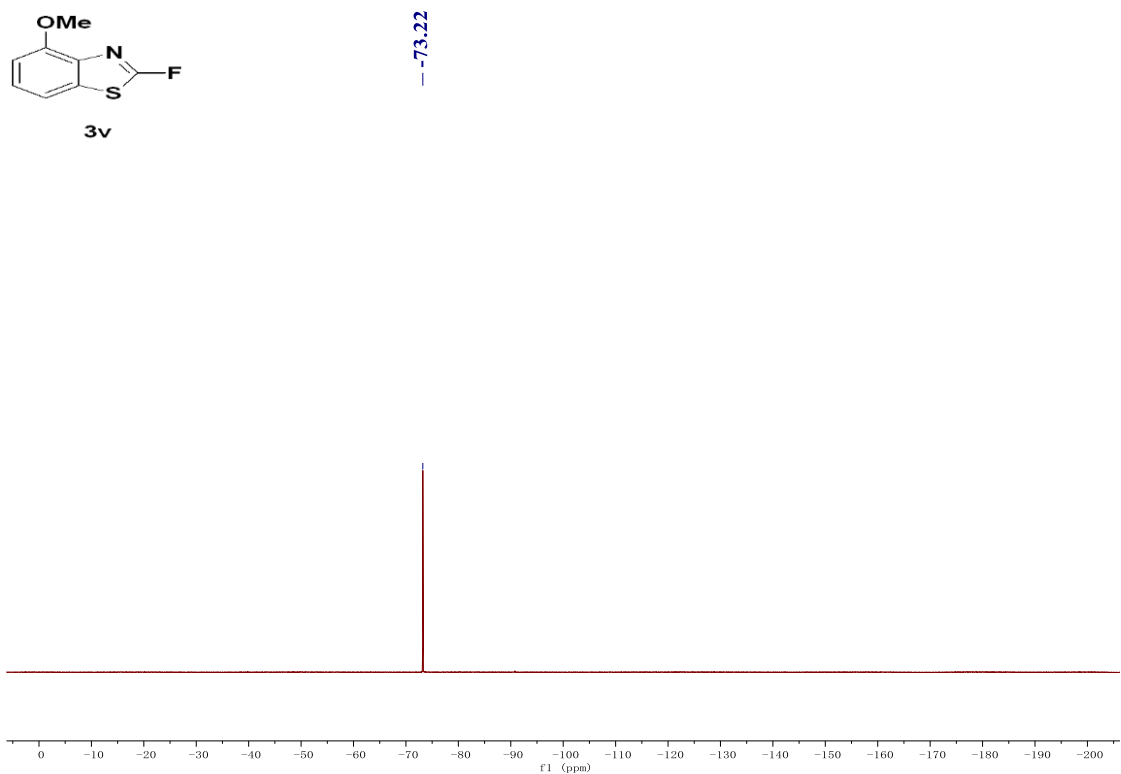

**Fig. 107**  $^{19}\text{F}$  NMR of **3v** in  $\text{CDCl}_3$

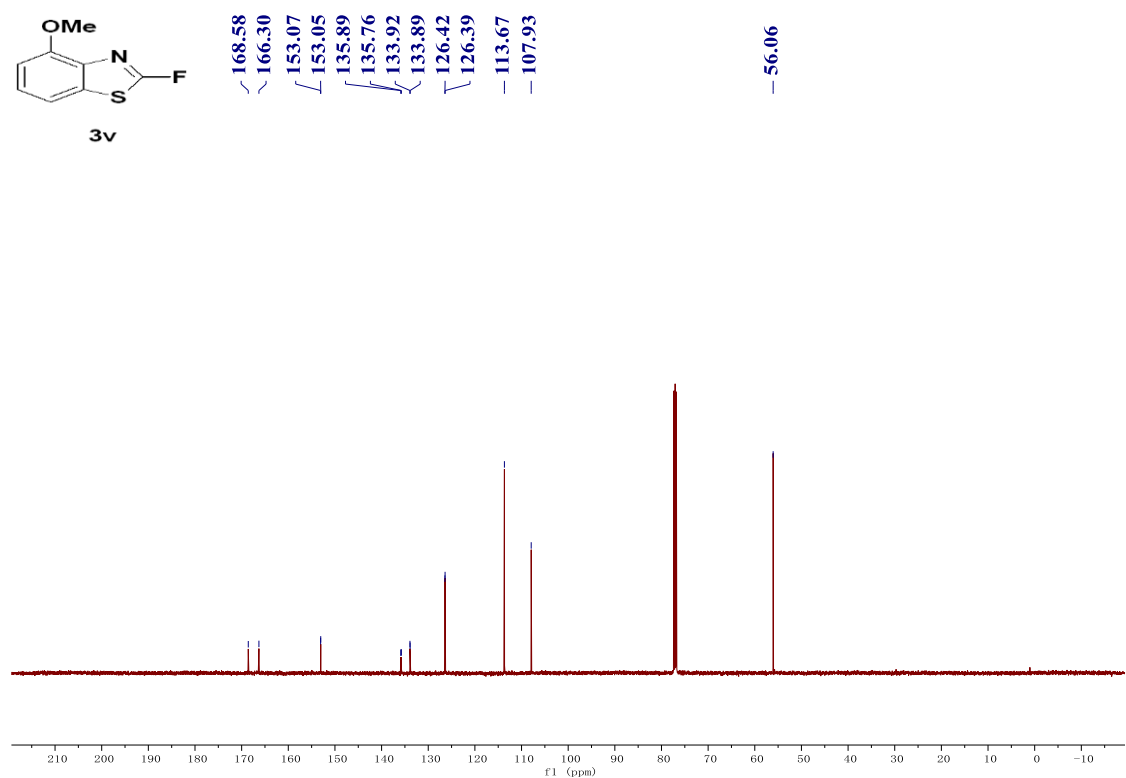

**Fig. 108**  $^{13}\text{C}$  NMR of **3v** in  $\text{CDCl}_3$

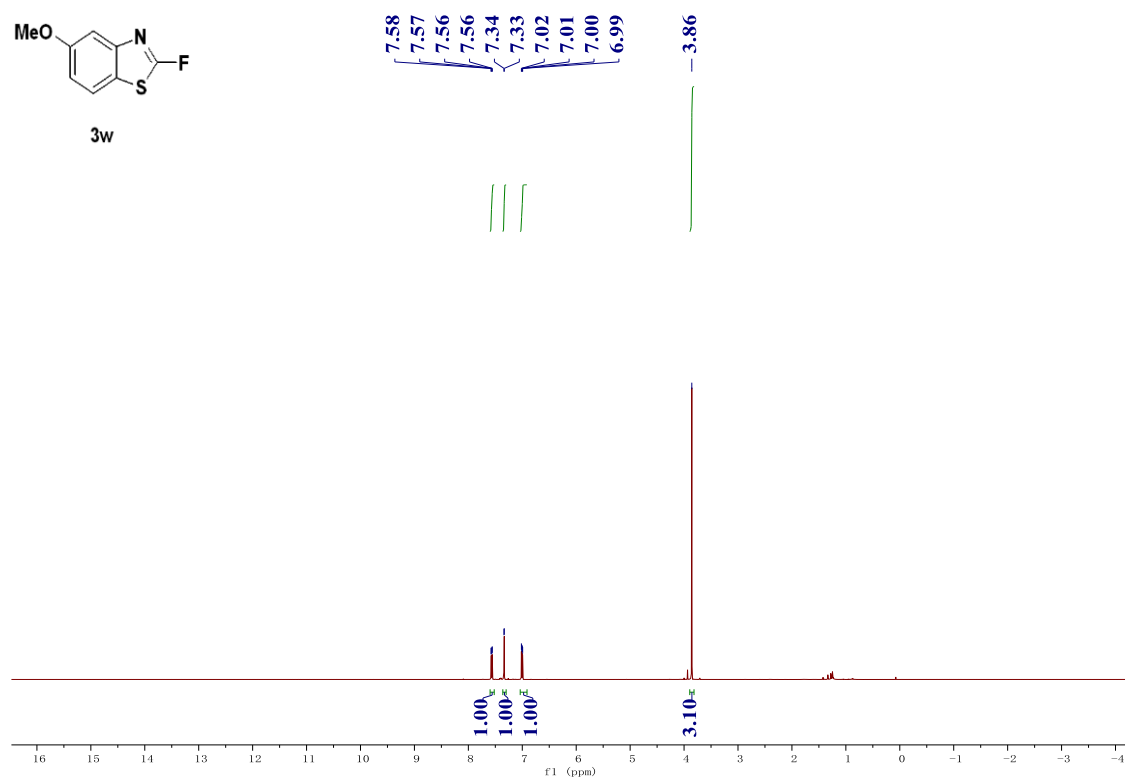

**Fig. 109** <sup>1</sup>H NMR of **3w** in CDCl<sub>3</sub>

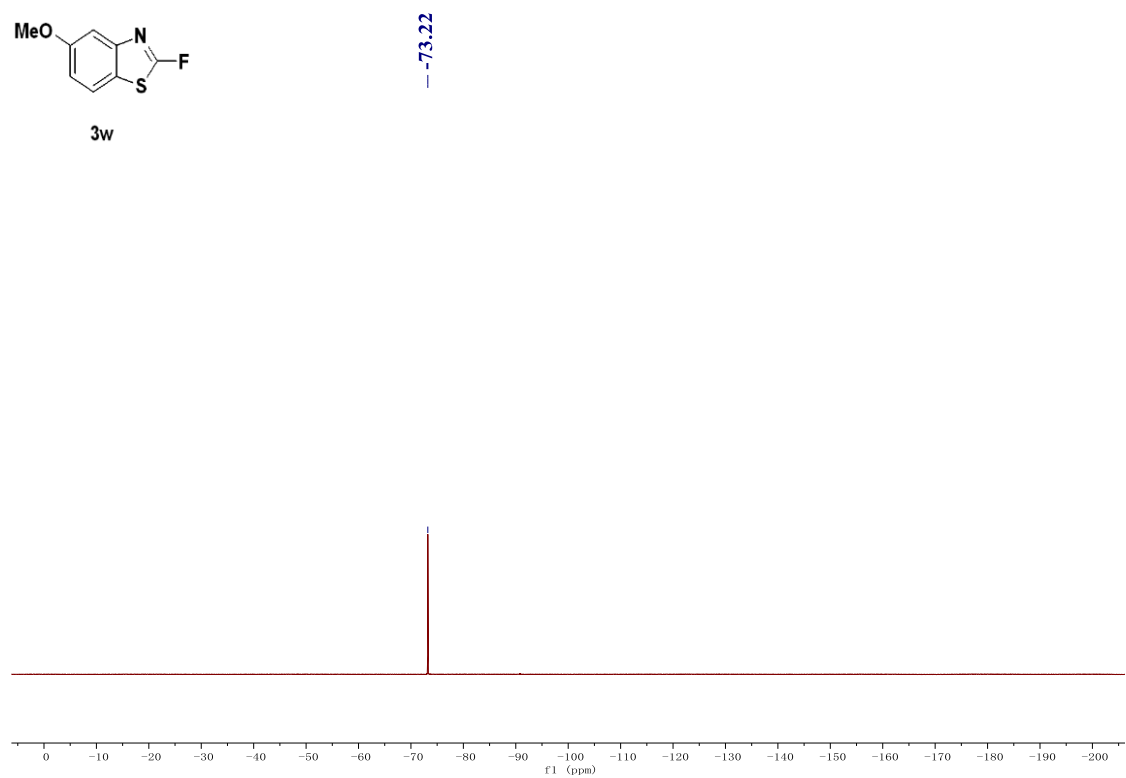

**Fig. 120** <sup>19</sup>F NMR of **3w** in CDCl<sub>3</sub>

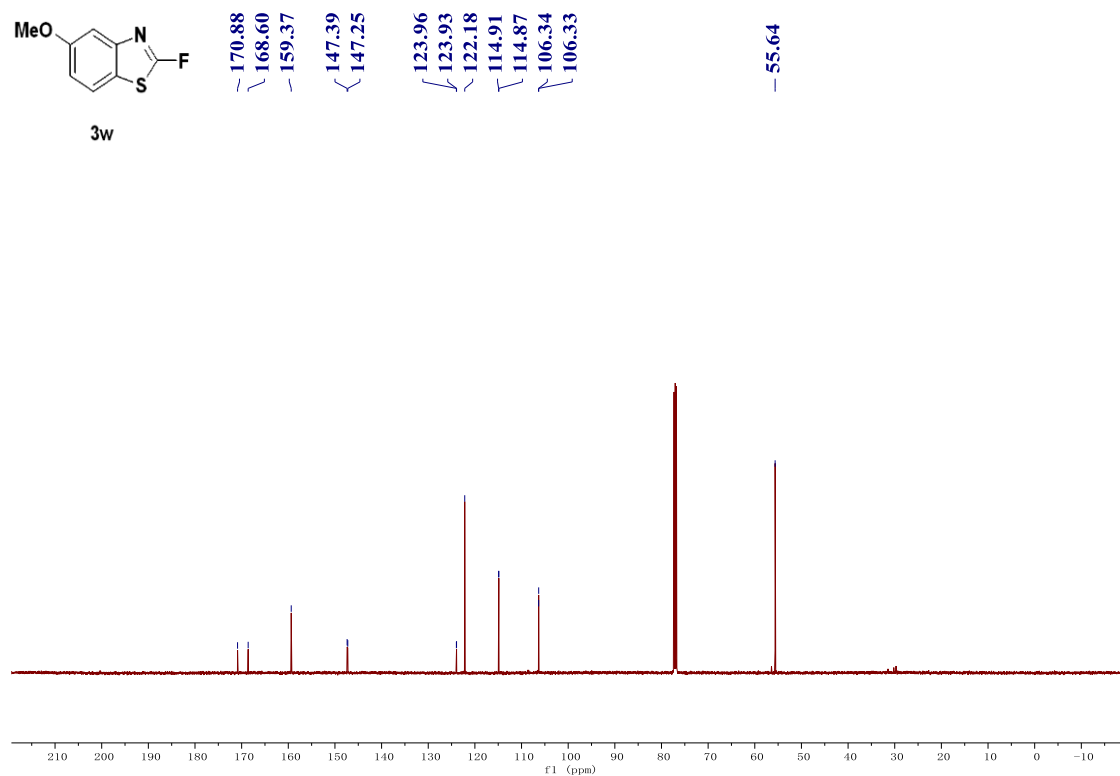

Fig. 121 <sup>13</sup>C NMR of **3w** in CDCl<sub>3</sub>

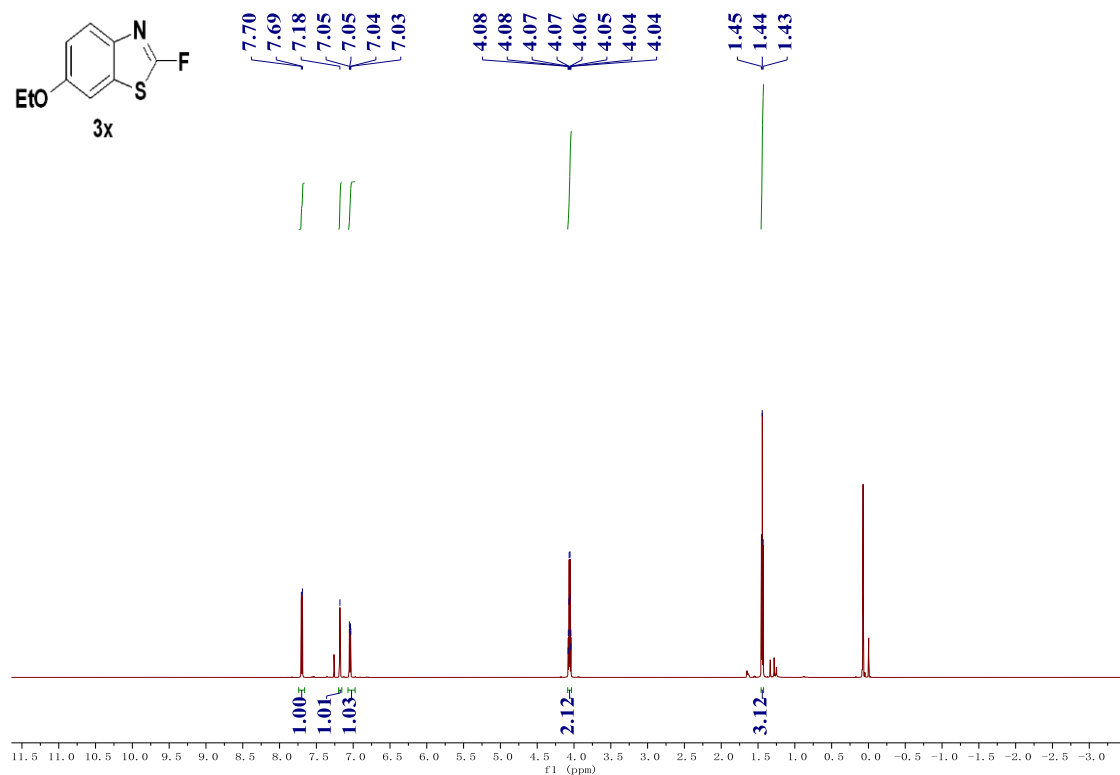

Fig. 122 <sup>1</sup>H NMR of **3x** in CDCl<sub>3</sub>

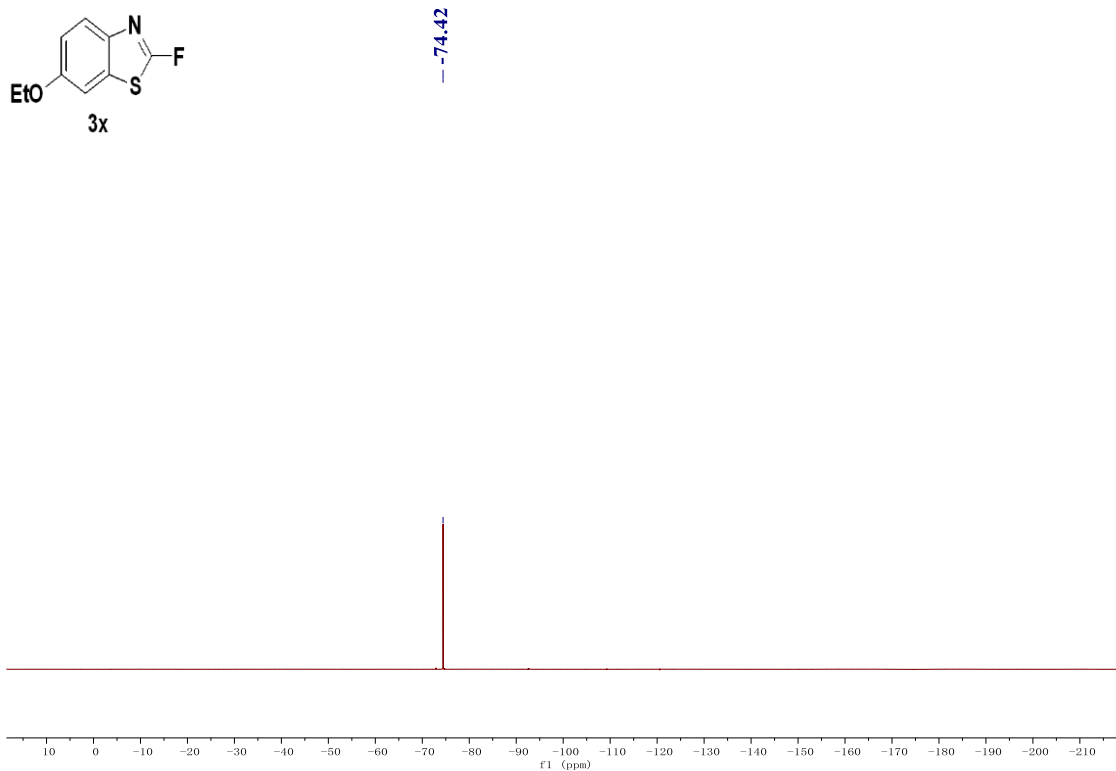

**Fig. 123**  $^{19}\text{F}$  NMR of **3x** in  $\text{CDCl}_3$

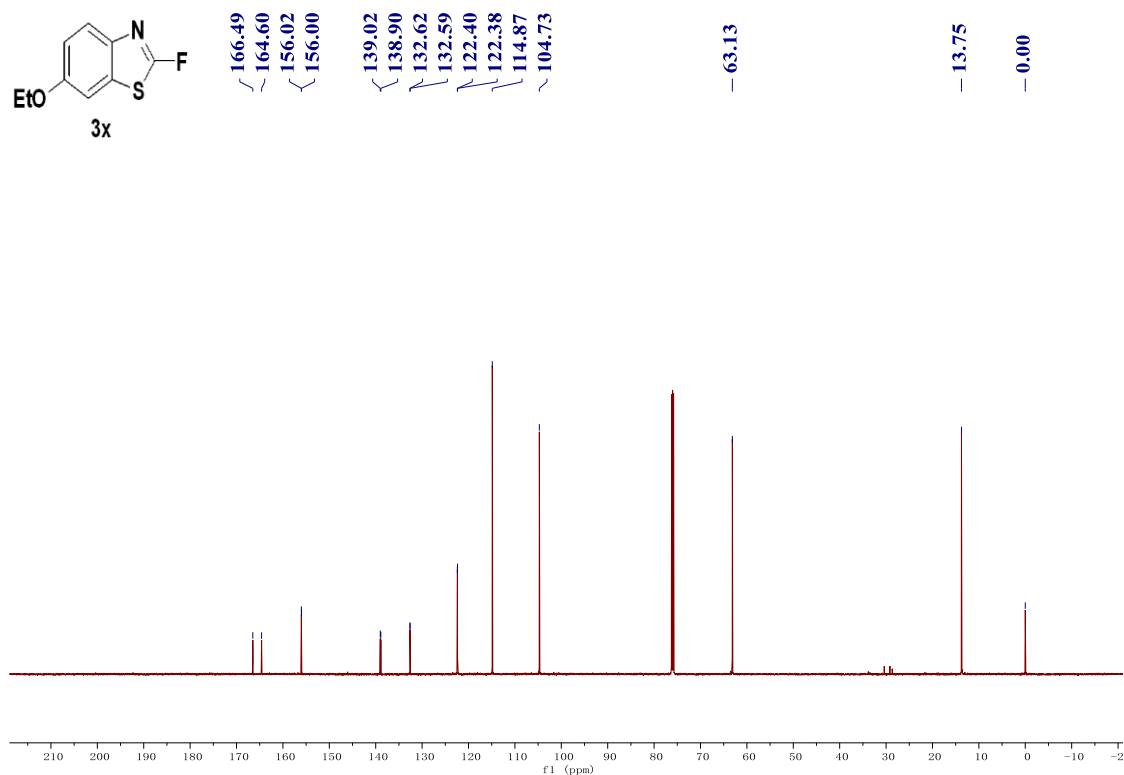

**Fig. 124**  $^{13}\text{C}$  NMR of **3x** in  $\text{CDCl}_3$



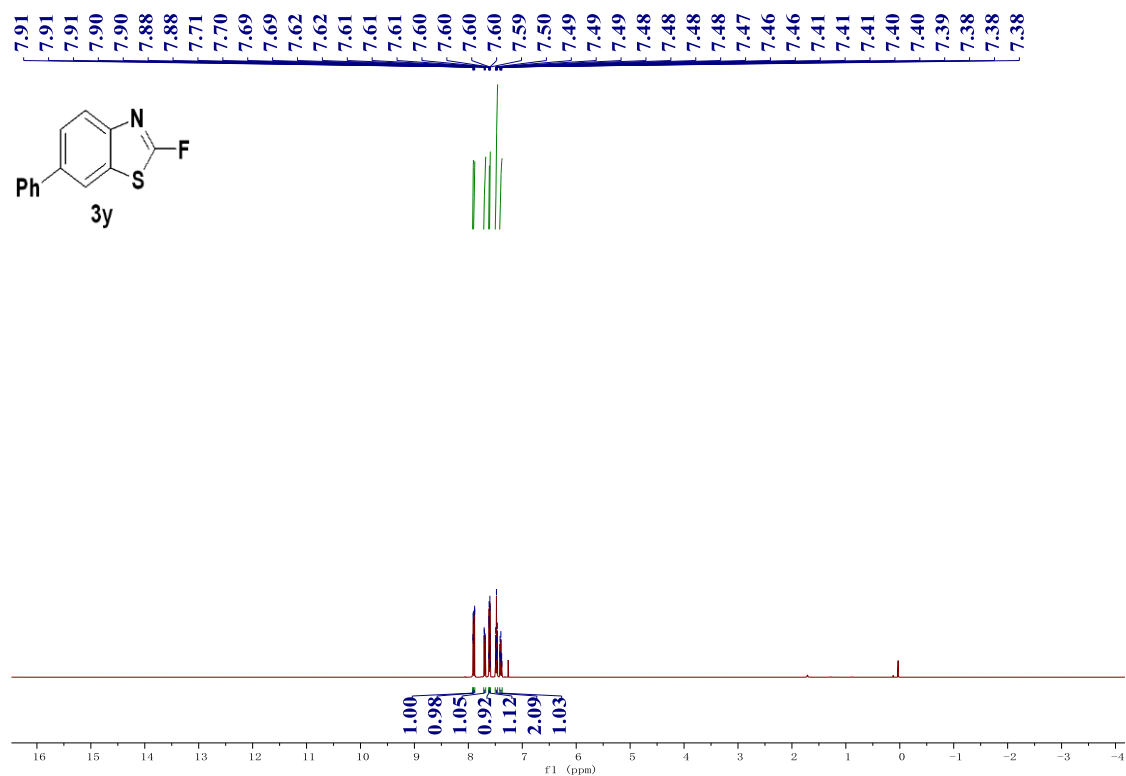

**Fig. 125** <sup>1</sup>H NMR of **3y** in CDCl<sub>3</sub>

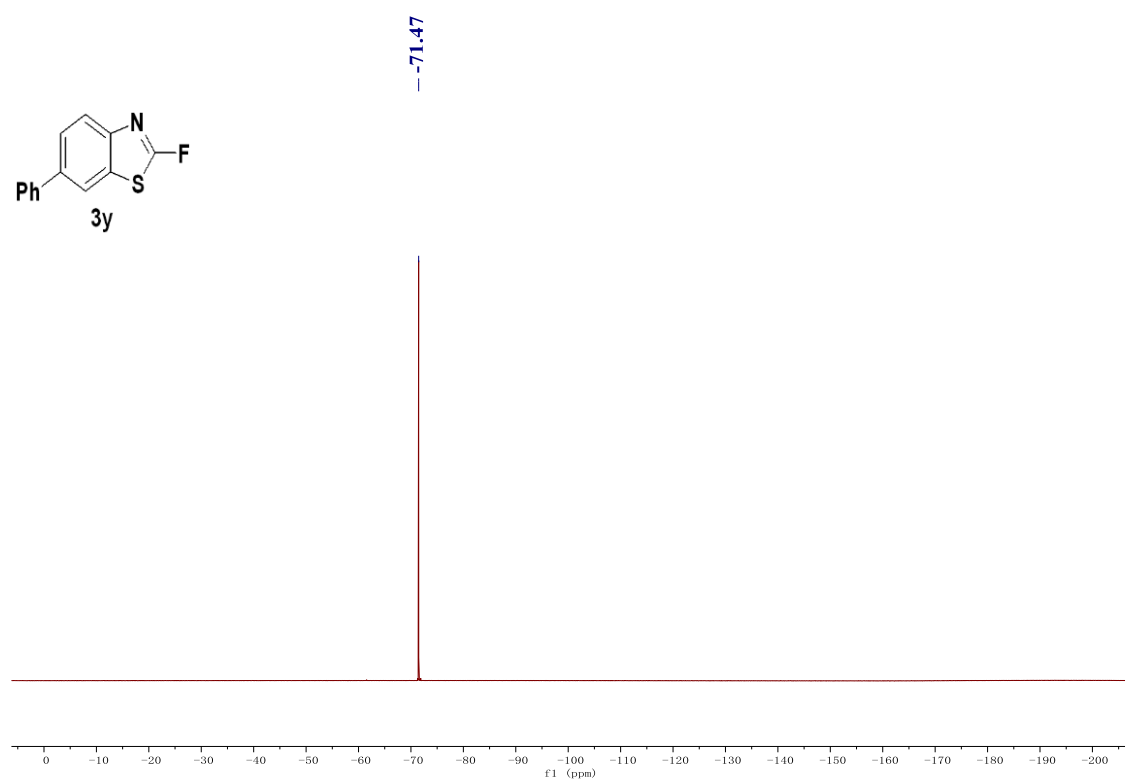

**Fig. 126** <sup>19</sup>F NMR of **3y** in CDCl<sub>3</sub>

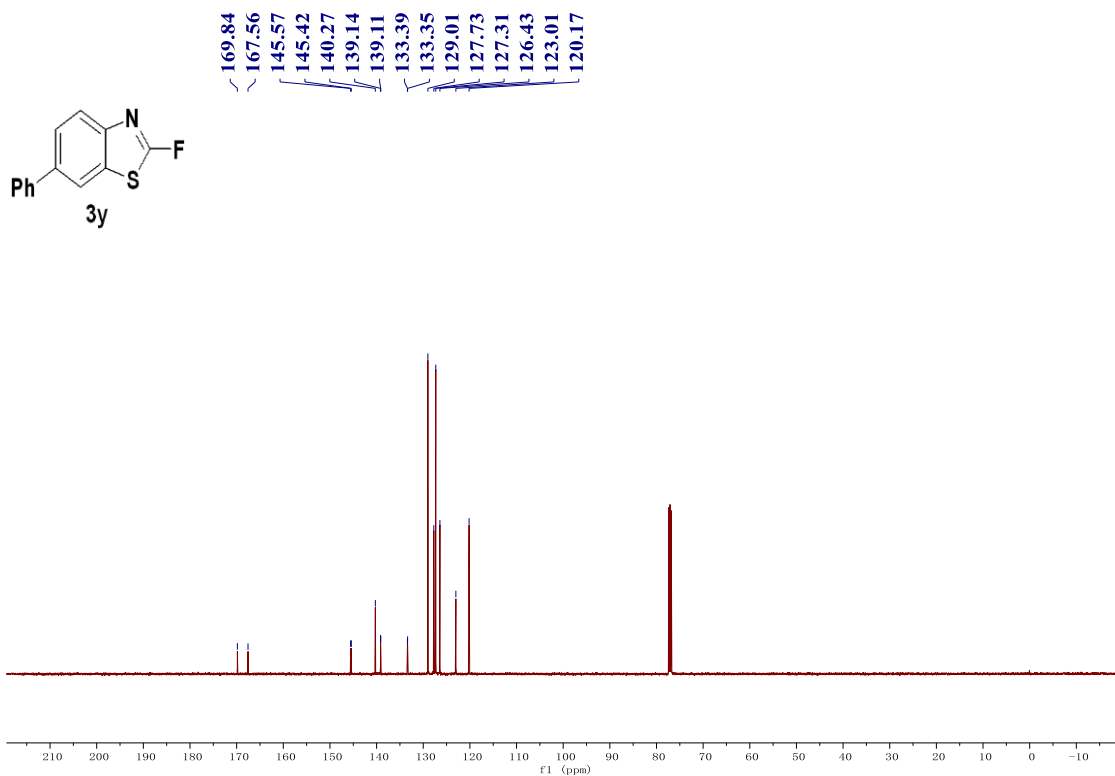

**Fig. 127** <sup>13</sup>C NMR of **3y** in CDCl<sub>3</sub>

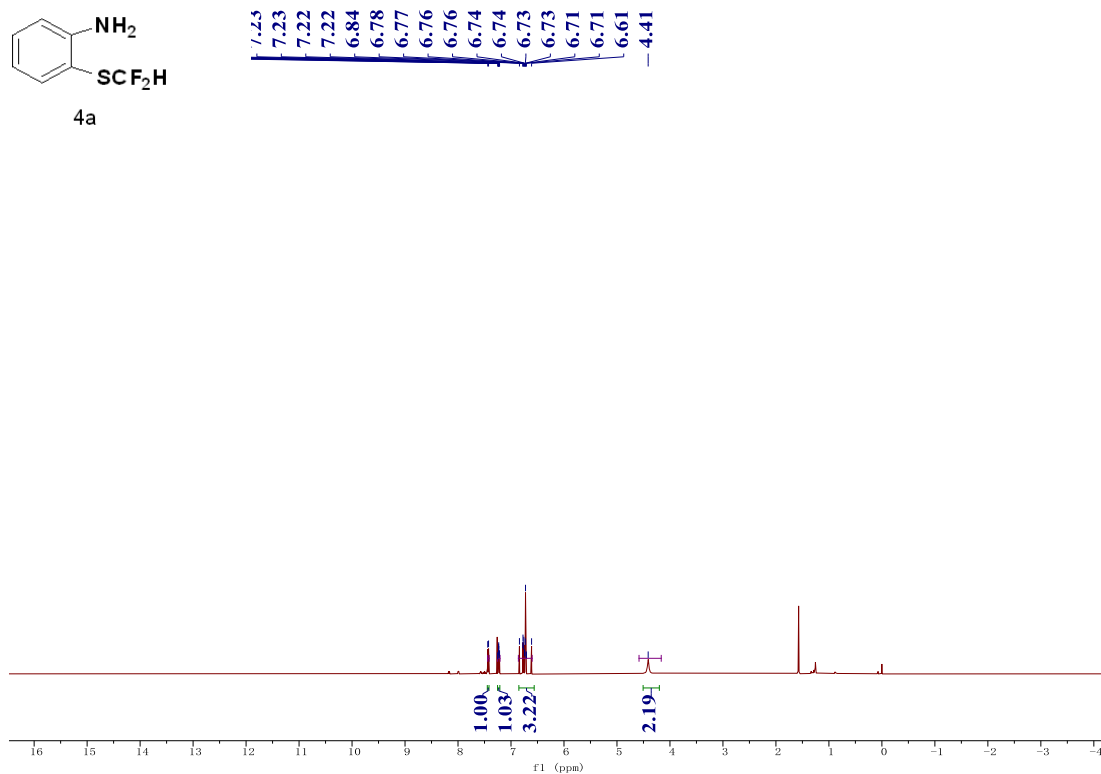

**Fig. 128** <sup>1</sup>H NMR of **4a** in CDCl<sub>3</sub>

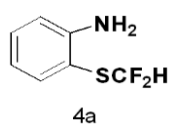

-90.94  
-91.07

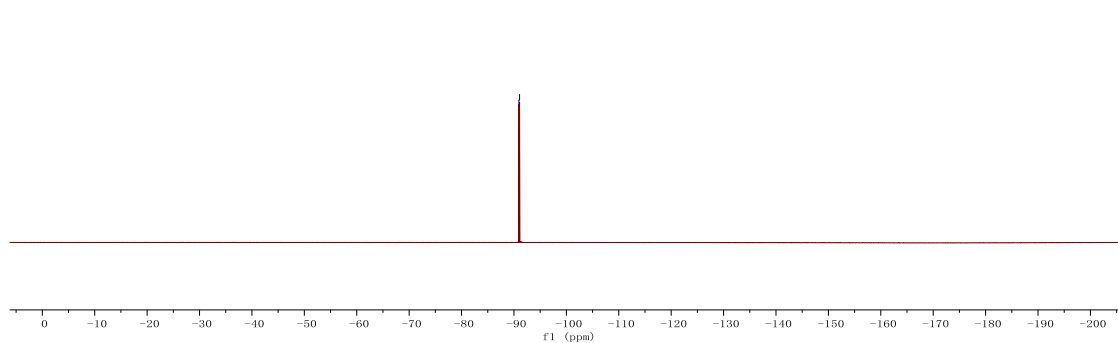

Fig. 129  $^{19}\text{F}$  NMR of **4a** in  $\text{CDCl}_3$

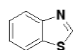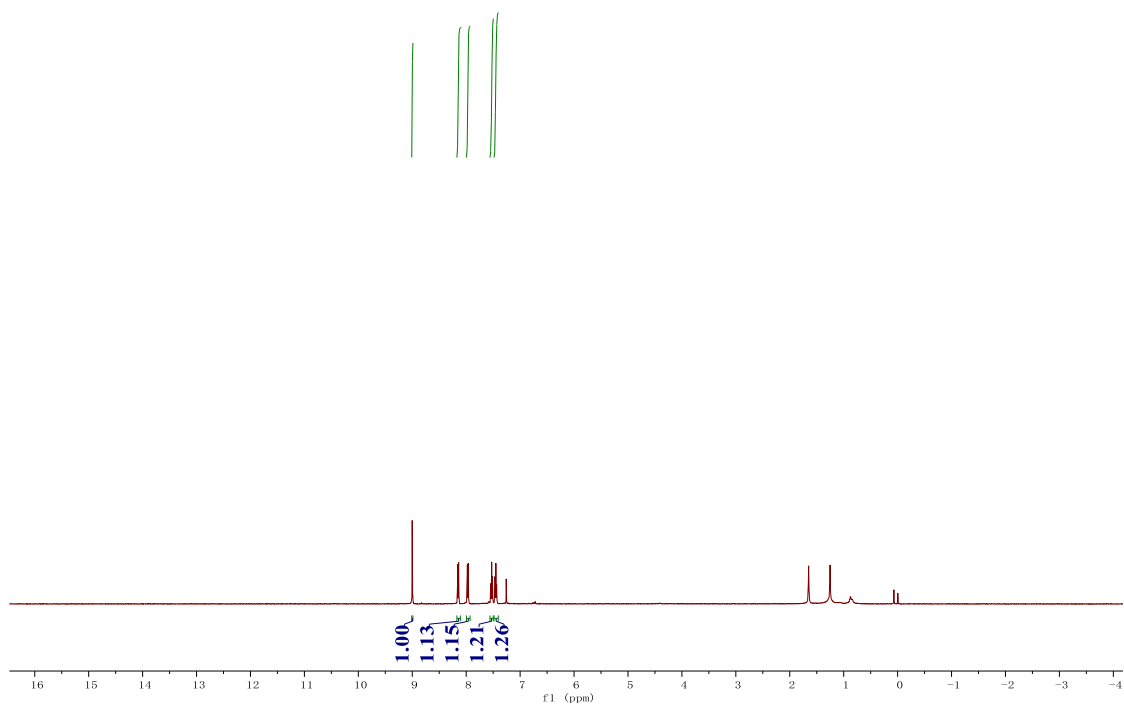

Fig. 130  $^1\text{H}$  NMR of **5a** in  $\text{CDCl}_3$
